# Supplementary material
Source: HighWire-hosted journal article supplement (doi:10.1101/rna.080819.125)
Supplement: Supplemental_FileS2.xlsx [file Supplemental_FileS2.xlsx]

## Sheet: pri-miR sequences (51)
>rna-XR_001273710.2 gene=gene-LOC106366705 name=LOC106366705 seq_id=NW_019168592.1 type=exon
GTGTGGGTGTGAAGATGTTCGATTACGATTACAAGTTGAGACACCTGTCGTCTCTTTTCTTTCCTTGTAATGTTTTggtctctcctcctcctcaaaaccCAACTTCtgataactaaaattttcattGGATAGCAATTCATTTCTCTGTATTTCCgtaattaattaataagtttCGATTATATAGCTAGGGTTGATGTGAGATTTGTATATCTAGATGGATCTATTTCTATGTTGGTTTTGAGAGGCTGAAGCTGCCAGCATGATCTGGTAATCGCTACATAcgacatatatacatatacatactAATTTAATTTACACATGTATCAATGTATCCAGGGCCGGCTGAGGCGCAGGTACAAGGGGGCGTGGACCCAgggtccaaattttttttttcataat…
>rna-XR_001273707.2 gene=gene-LOC106366705 name=LOC106366705 seq_id=NW_019168592.1 type=exon
TGTGGGTGTGAAGATGTTCGATTACGATTACAAGTTGAGACACCTGTCGTCTCTTTTCTTTCCTTGTAATGTTTTggtctctcctcctcctcaaaaccCAACTTCtgataactaaaattttcattGGATAGCAATTCATTTCTCTGTATTTCCgtaattaattaataagtttCGATTATATAGCTAGGGTTGATGTGAGATTTGTATATCTAGATGGATCTATTTCTATGTTGGTTTTGAGAGGCTGAAGCTGCCAGCATGATCTGGTAATCGCTACATAcgacatatatacatatacatactAATTTAATTTACACATGTATCAATGTATCCAGGGCCGGCTGAGGCGCAGGTACAAGGGGGCGTGGACCCAgggtccaaattttttttttcataatt…
>rna-XR_001273708.2 gene=gene-LOC106366705 name=LOC106366705 seq_id=NW_019168592.1 type=exon
GTGGGTGTGAAGATGTTCGATTACGATTACAAGTTGAGACACCTGTCGTCTCTTTTCTTTCCTTGTAATGTTTTggtctctcctcctcctcaaaaccCAACTTCtgataactaaaattttcattGGATAGCAATTCATTTCTCTGTATTTCCgtaattaattaataagtttCGATTATATAGCTAGGGTTGATGTGAGATTTGTATATCTAGATGGATCTATTTCTATGTTGGTTTTGAGAGGCTGAAGCTGCCAGCATGATCTGGTAATCGCTACATAcgacatatatacatatacatactAATTTAATTTACACATGTATCAATGTATCCAGGGCCGGCTGAGGCGCAGGTACAAGGGGGCGTGGACCCAgggtccaaattttttttttcataatta…
>rna-XR_002658214.1 gene=gene-LOC111205685 name=LOC111205685 seq_id=NC_027758.2 type=exon
aagaaacattttatttttaaaggtaATTATATTGTTCcagttataaataaatttattcatatttgCCTTCAGATCCAACTTTCGTTCCCTCTTTCGAATTTTTTTAAGTACCAGCAAAGTTTGGTTAATTCTTTCCCCCTCTATATATTTGTACCTCCACTCCTCTTACATCTCCACAAATCCTTGACAAAGAATAATTCTTCGGTTTCATTTTCCTCCCATCCAAATAAAATTACATACATATGTTTATTATGTTCCCTTTAAAACCGACGCATAAGCCATCCAACATTCATATTTAGAAGTCTTGTATACGTAACGTATGGAATAATAGTCGTGCCTGGCTCCCTGTATACCACAAGCAAACACCGATCTCATTATGAAATCGATCGCTAGTGGTGT…
>rna-XR_002656916.1 gene=gene-LOC111204469 name=LOC111204469 seq_id=NC_027757.2 type=exon
CTTAACCTTATAacattttttactttagttaaaatataaaacaatagtGAATAGTCTGTGATATTAAACTATATAGGGTGCAATATTGCTCTAGTTTAGATAGTTAAGTTACATTTTTgcttaaatattaaactacaggCCTGTGATACATTAAACTATATACGATGTATTTCTATAGTTCAGATAATTAGACGTAATTAATCTCCGCAATTGATATATCACATCAACCtctgatatttttgtttgtttgttttgtctgTTGAGTTGCTTTTTTGGCCTTGTTTTGTCTGTTCATTGGCTGTCGTtaagaaaatacttaaaaacaaaaaaagttaaacgcGAATAACTATTCTAATACAAGCGAAGAACTGATTCCCAAAAAGTAATTAGCTCCCAGTT…
>rna-XR_002660319.1 gene=gene-LOC111208321 name=LOC111208321 seq_id=NC_027757.2 type=exon
CCATTTATACACACGTCTCCAGAAATCCTTGACAAAGAATAACTCCATTTTTTCTCTGGTTCCATTTCTCCCACCCAAATGAAACTacagaaacatttttttttctattggaATCAAGACCGAACGACTATATAAGCCATCCATGATTCATATTTGGAAGTCTGGTATACACCACACATATATATGATACGAAGTCATGCCTGGCTCCCTGTATGCCACAAGTAAATACCGATCTCATTATGAAATCGGACACTAGTGGCGTACAGAGTAGTCAAGCATAACCACTGATATTCTTGATATATGAGTACTTTGTTTTTGTAACACAAGATATATATGTGTGGATGGTGGCTAGCTATAAGATATATGTTATATGCATGGATTATGTCTAGAACTGTTATA…
>rna-XR_002660886.1 gene=gene-LOC111209134 name=LOC111209134 seq_id=NC_027774.2 type=exon
TTGGTTAATTCTTTCCCCCTCTATATATTTGTACCTCCACTCGTCTTACATCTCCACAAATCCTTGACAAAGAATAATTCTTCGGTTTCATTTTCCTCCCCATCCAAATAAAATTACATACACATGTTTATTATGTTCCCTTTACAACCGACGCATAAGCCATCCAACATTCATATTTAGAAGTcttgtatacatatatactacGTATGGAATAATAGTCGTGCCTGGCTCCCTGTATACCACAAGAAAACACCGATCTCATTATGAAATCGATCGCTAGTGGTGTATAGAGTAGTCAAGCATGACCAAAGCTTTTCTTGATATATAAGTACTTTGTCTTTGTAACGCATAATGTCTATAAAATTTCTGGTATATGTATGCATGaattatgtttagaaa…
>rna-XR_001272838.2 gene=gene-LOC106360797 name=LOC106360797 seq_id=NC_027774.2 type=exon
GAAAAAACACCATTGCTcccacttagagagagagagagagagaaagaaagagagttcTTCACAGGCTCAGAGCAACTAGAGAAAGGATCCAAAGGGATCGCATTGATCCTAATTAAGCTGAATTTATTCCCaaataattgttatatttttctcaatCTAAAGAAAAAGTCCCAAAAATCTGCTTCGTTTTCAGGATCATGCGATCTATTTGGATTCATCCTTTGGTTGCTTCCATTTTGGTCAAAGTGTTTCACTGCCGGGGACTTCACCGGCGGGAAAATCTCCAGTGGGTCGATCCATGCCTCTTGGTCAGCGCAGGGAACTAGCCAACTTGGTGCAAAACAGTTGACGAATGGGGACCCAAAAACTCGTGATCTTCCTCCTTTAGCAAGGGAGTCA…
>rna-XR_001278112.2 gene=gene-LOC106389769 name=LOC106389769 seq_id=NC_027774.2 type=exon
CCTCATAAGatgaaactctataaattaaaatgttctGTTCAATTCAATGCCTCGCCAGACATCTGTTCCCTTTGCATGTAAGAGAGATAAAGAAAGCGACAAAAGCCATAAAGAAAGATAAGACTCTTTGAATGATAGAGAGATAAGGCTCCTCTTATCTTCTCAACAgatctttgtttctttcttcttttcttttcgttttttccttttttggttATGTTTGTTCTCGATTTAGACAAAAAAACCCTAGACTTGATCTTCCAAAGGGTGTCTGAATTTCTTCCCTTTGTACAGATTTGTATTCTTTCTCTTTGTGGTTCTTTGCCTTCTTTAGTTAAAACTTAGATCTAACCATTAATCTCTTATCTTTTCACTGACCCAATGACTCTTATTCTTCGT…
>rna-XR_001282809.2 gene=gene-LOC106414208 name=LOC106414208 seq_id=NC_027774.2 type=exon
TTGCAGTCTCATAGACTTTGCAAATAGCCACCTTCTTTtctctcctctgtttcttctacTTAGTACTTTTTGTTTTGGACGTTGCTGAAAATAAGAGTTCTGCGCGGATCCGATGATCTTCACCGCTAGTGATGAAAATCGGATGAGACGGGTTTTGGTTGTGATGTAAGCTGGTCAAGCGAGATATTAGTGCGGTTCAATCAAATAGTCGCACTCTTAGTAGATAGAGATTGATTTTGTTCGATTGAGCCGTGCCAATATCACGCATATAACCAAGATGGTTATTAACCTCAAAAGTATATTGTCAATCATCTTAAAGAGTGATAGAGCTCAAGGTACTCAAGTGCAGGACGATTCCATGACCAGCCTTGCTTCATCAGTGATTTAAACCACTCTCTA…
>rna-XR_002664208.1 gene=gene-LOC111215065 name=LOC111215065 seq_id=NC_027760.2 type=exon
CTTTGGAGTCTTGTGCGTTGCGTCTTTTAGCTCATGAAACGAAACtctatatatcaattaaaatgtTCTGTCCCCTTTGCATGTAAGAGAGATAAACAAACCGACAAAAGCCATAAAGAAAGATCTCTGGAGATGGAAGAACTGCGAGTGAATGAGTTgggacaaaagaaaaacatagcaACTGACAGAAGAGAGTGAGCACACAAAAGTAATCTGCATATACTGCATTTGCTTCTCTTGCGTGCTCACTGCTCTTTCTGTCAGATTCTAGTGCTGATCTCTTTGGCCTGTCCTTGTTCTCTTTgtctcaatctctctctctctctctcacatacGCAATCTCTCTCTACTTCTCTTGTTCATCTCAAATAAAGGTAAGCTTAATATGCGATTTAAACG…
>rna-XR_002664209.1 gene=gene-LOC111215065 name=LOC111215065 seq_id=NC_027760.2 type=exon
CTCCTCTTATCTTCTCATCAgatctttgtttctttcttcttcttctttttttttgcttttttggttatgtttttCTCGATTTAGACAAAAACCCTAGACTTGATTTTCCAAAAGATCTCTGGAGATGGAAGAACTGCGAGTGAATGAGTTgggacaaaagaaaaacatagcaACTGACAGAAGAGAGTGAGCACACAAAAGTAATCTGCATATACTGCATTTGCTTCTCTTGCGTGCTCACTGCTCTTTCTGTCAGATTCTAGTGCTGATCTCTTTGGCCTGTCCTTGTTCTCTTTgtctcaatctctctctctctctctcacatacGCAATCTCTCTCTACTTCTCTTGTTCATCTCAAATAAAGGTAAGCTTAATATGCGATTTAAACGATGGCTTG…
>rna-XR_002664210.1 gene=gene-LOC111215065 name=LOC111215065 seq_id=NC_027760.2 type=exon
AGTATCTCTTTCCTCTATTcatgtttgtgtgttttctcTCTATGGTTCCTTGTCTACTTTAATCTCTGGAGATGGAAGAACTGCGAGTGAATGAGTTgggacaaaagaaaaacatagcaACTGACAGAAGAGAGTGAGCACACAAAAGTAATCTGCATATACTGCATTTGCTTCTCTTGCGTGCTCACTGCTCTTTCTGTCAGATTCTAGTGCTGATCTCTTTGGCCTGTCCTTGTTCTCTTTgtctcaatctctctctctctctctcacatacGCAATCTCTCTCTACTTCTCTTGTTCATCTCAAATAAAGGTAAGCTTAATATGCGATTTAAACGATGGCTTGTTCCTTGTATAGATCTGATTGCATGCGAGGTGATAGCTTTAAACTTTCACCAT…
>rna-XR_002664297.1 gene=gene-LOC111215201 name=LOC111215201 seq_id=NC_027760.2 type=exon
ttgctagAACAAGTAATAACATAGTAAATGAGAATCCAGTGACATGTCTCAAAAAGTAAATCCAATGTTTTTACTGCGATATCTTGAAATTTGAAAGAGAGAGGGACAGAGAGTGTGGGGACCAGAGACACCCATGTTTCTTGTCTTGTTTATCTTTGGTTCTCCACTAAATTTCTTCATAAAAAGCcctttttatttcttgattCTCTCTTCTATCATCACCACTCacttatcttcttctccatctcgtctctctctctctctgtttctctcttgATCTTAGCCGGGTCTTGTGGGAGGAGCAAACCGACAGAGAGATAATTTTAGATCATTATAAACCATACAATGATTCTTCGAGGGAAGGGGCTTTCTCTTTTGAGGGGAATGTTGTTTGGCTCG…
>rna-XR_002654760.1 gene=gene-LOC111201542 name=LOC111201542 seq_id=NC_027766.2 type=exon
CACTCCCTGTCTAGTGCTTATCGTACACACCTATGCATATGTATGTAATGTATACGTACATACTCTTCTCTCactaaaaagattttaaaattaaataagcatctttttaccaaaaaaaagttagatCAGCATTTATGATAGAAAGTTAGTACAATATTGGTTTGTTGCGTCTGAGACTTTTCGACAGATCGGAAAATAACTAACCAGTCAGTATTTTTTTTCACGCAATTTTATTTGTCCCTACAAAAATGAATACGGTCTAAAACAGAATATTCCGTATTTTGTTTGGAAACGAACCATTTACAGATAGACACGTCAGCCCTTGGATTCTGGAACGTATTCTCTCTACTTCAGTCTTCAGCTATATATCTACTTTACTCGTCTCCTTGTTtctttcac…
>rna-XR_002653174.1 gene=gene-LOC111199259 name=LOC111199259 seq_id=NC_027763.2 type=exon
ctctctctctcttctctctctatctctctgctTTAGATCTCAGTCTCATCAGGTCTTATCTGCTTAGTAACTGGCTTCCACGATCTGGTTACATGTATATATGTCATTCCCTTTTTgcaaatcaaaattttgtatgGTTTAATCTTATTTTGCTGTTTTGGCTGTATATATCAGAGGGTGTTTTTTACATCCCCCTCTCTCATCTCTATCGCTTAGGGTTTCGCTTCTTCtgtgttttagttttgttttgttccaaTTAAGTAGAAGAGAGTAAAATTCCGTAATTTTTTTACTTCTCATCTAATCATACCAAGCCATTTCGAATAGTTCGTCAAGTTTCTCCtctcatatgtatatatatatatatgtattgtatATGCATAACTATGTATTTTGTAC…
>rna-XR_002653184.1 gene=gene-LOC111199262 name=LOC111199262 seq_id=NC_027763.2 type=exon
GAACATGTCCATCATTTATATCAATGGCCTTGGAGAAAAACAACATTGCTCCcacttagagagagaaaaagagttcTTCACAGCAACTAGAGAAAGGATCCAAAGGGATCGCATTGATCCTAATCAAGCTGAGTTATTCccgaataattattttaattttttctcaatggaaagatagaaaaaaaaaattttgcttCGTTTTCCGGATCATGCGATCTCTTCGGATTCATCCTCTGGTAGCTTCCACCTTGGTCAAAGGGTTTCTACAAAGTTTCGAGGATTTAGGACACATGTCAAGAAAACAAGAATATGAGTTTAATACAACGTGGAACAGACACTAACTAAAGAATTTTGAagggagaagagagaaggaaaaACAATACTAATGATTATGTTAGC…
>rna-XR_002661552.1 gene=gene-LOC111210097 name=LOC111210097 seq_id=NC_027759.2 type=exon
CTCTCTAACTAGTCGTGTGCTTATAAATATAGACATATATGTATGCATGTATAAGTACTCTTCAAtcgtaaataaataattttaaaattctgttaAGCATTTATGATAGAAATGTACAAGATTGGTTTGTTGTGTCTGAATCTGTACGGGTCGACAGATCGGAACATAACTAACCAGTCAgtattgtatattaatttaatatatcttcCACCTATATGCTTCGTTCTTCAACAATCATCGCATATTTTTTCCTGGAATTATGTTTCGTTTTCAATATATTGGTCcctaaattgattattttttgtaatttcttatggtataaaacaaaatattccatatttttttatatgacgAGAAAACATTTACAGGTTGACACGTCAGCCCTTGGATTCTGGAACG…
>rna-XR_001285906.2 gene=gene-LOC106430124 name=LOC106430124 seq_id=NC_027759.2 type=exon
TCCTTCCTCTCTGTTTTTCATTTCCCTTCTGCTTCCATTAAATCTAAGTTTCTAAAAAATGTTTCAGATCTTATTCATTTTAGggctttaaattttttctacTCTCTCTTGATAGAGAGATAAAGAGAAAGAGCCAGCACACATATATGCTTATATTTTGCATGGAGAGAgtgaatatttatataagattaacCTTTCTTTCTCCATACCAGTTTCAATTCTGAGTCGTATCTTCATCACCTTTTGTTTCTAGCTTCAGTTctttaaaacgaaaaaaaatctAGAGCTGAGAATTAGAGAAACCCTAGTTAGTGTCCGTACTTAGATATtttactttccttttatggATTCATAGATCGAGGTCTTGTTAGTTGTTATTATTCCCAAATCTGATCTCAA…
>rna-XR_002662798.1 gene=gene-LOC111211970 name=LOC111211970 seq_id=NC_027759.2 type=exon
cacatggAGACCAAAGAGATGAAGATGCATATTCATGCAAATTTCAGGTGATGTAGTTGAGAAGTAGCTGTAAAGCTCAGGAGGGATAGCGCCATGTCTCACCAGTACTATGAAATGTTTGTATATCTATATTGGCGCTATCCATCCTGAGTTCTATGGCTTCTTCTTGCTTTTATCCTGAGATGGTAAGGAACGGGCCTCTGTATTGTTCCAATGTTGGATGGAGCctttaaccaaaacaaaatgtGGTAGATGGACCCAGCCGACGATTGATCTACTGCATTCCGCCGTTCATAAGCAGGATCCTCAGTGGAAATGATCAAGAAAAAATCACGAAATCCACTATCCTTCCAACGAAAATTGGATCTCAACAAGATTTCCAATTGGCTCCTACCGTAT…
>rna-XR_002662891.1 gene=gene-LOC111212237 name=LOC111212237 seq_id=NC_027759.2 type=exon
CTTAACCTTATAacattttttactttagttaaaatataaaacaatagtGAATAGTCTGTGATATTAAACTATATAGGGTGCAATATTGCTCTAGTTTAGATAGTTAAGTTACATTTTTgcttaaatattaaactacaggCCTGTGATACATTAAACTATATACGATGTATTTCTATAGTTCAGATAATTAGACGTAATTAATCTCCGCAATTGATATATCACATCAACCtctgatatttttgtttgtttgttttgtctgTTGAGTTGCTTTTTTGGCCTTGTTTTGTCTGTTCATTGGCTGTCGTtaagaaaatacttaaaaacaaaaaaagttaaacgcGAATAACTATTCTAATACAAGCGAAGAACTGATTCCCAAAAAGTAATTAGCTCCCAGTT…
>rna-XR_002663545.1 gene=gene-LOC106438439 name=LOC106438439 seq_id=NC_027759.2 type=exon
aacattttgtCACAAGTATAAAGcatacattatataatttatttatttattttatatacacacacacttCTCTTGTATATTCACACAAAGATGTATGCTTTCTCTTtgtctctcctctctcctctctctccatctctctgtTTTAGATCTCATCAGGTCTTCTCTGCTTAGTATGTGGCTTATCTGGTAACATGTATTATATAcgtcatacttttttttttgcaaatcaaaatttgtgttgttttgtttcattttactGTTTTAGCTGTATAAAATACCAAGTTCAGACTTCAGAGTGTATTCAAGATTTTTcattctcctctctctcttagGGTTTcgcttcttctgtttttttttctttttttggtctgGTTCCAATTAAGTAGAAGAGAGTAAAAT…
>rna-XR_002664046.1 gene=gene-LOC111214693 name=LOC111214693 seq_id=NC_027759.2 type=exon
TCCTCTTACACCTATCTGCAAAAATCCTTAAAGAACAATCGCCATTTTTTCTCTGATTTCATTTCTCTCCTAATCCCAAATGAACTACGAACACATCTTTATTCTTTACCTACGTATAAGCCATCCAACATTCATTTATGGAAATCTTTTTtctacaatatattatatatgtgtgtgtgctCTTATGGTCGTGCCTGGCTCCCTGTATGCCACAAGTATATACCGATCTCGTTACGAAATCTGTGGCTAGTGGCGTACAGAGTAGTCAAGCATGACCAAAGCTTTTCTTGGTGTATAAGTAGTATTTTGTCTTTATAACAACATATAGCATGTATGGTGTTTTATATGCATTTTATTATACGCATGGATTATGTTTTATTGTACACatcttcattattt…
>rna-XR_001289864.2 gene=gene-LOC106452787 name=LOC106452787 seq_id=NC_027759.2 type=exon
CCCCCAAGTTAAAAGAAAagtgaaagataaaaaaaacacaatctcCGCTATTTTCaaaccctttctctctctttatatacCGACTGTGTAGTAATACTAACAGAGATCTCTGAGAACTGAAAGACGATTGAATTGCGGGTTCTCTGGAGTATTCATTAGGGTTTGTAGAGATCTGTGGGAATGGGAGGTGAATAAGCTAGAAAATTGAGTCCTTTTGCACAGAAAATCTATATATGGGTTTGTTGTTTTAAGACAGAGAAGGAGGTGATTGAGGATTTGCAACAGAGAAAACTGACAGAAGAGAGTGAGCACATGCAGGCACTGTTATGTGTCCATAACTTTGCTTGTGCGTGCTCACCTCTCTTTCTGTCAGTTGCCTGAGTTCTCGCTttcacacac…
>rna-XR_001283710.2 gene=gene-LOC106418636 name=LOC106418636 seq_id=NC_027775.2 type=exon
GAGAGACGACGGTGGATGGAGGGAAAAAAAAGGGTTATCGGCGGTCTCGGATTCGCTTGGTGCAGGTCGGGAACTGATTGGCTGACACCGCCACGTGGATTTTCACGGTTGGCTTGTGAGCAGGGATCGGATCCTGCCTTCCATCAACTGAATCGGAGCCCGAGGTGAAAATACAAAAGTTTCCAACTTTCAGATCTGACATTAAACCTTGTTTAGTTTTGAAGCAGGGTACTCGATTGGCTAATTCGGTTAGATGTGTGATGCCCACTCTGTTTCTAAAGGCTGTGGATTTTGATGTAAAAACTCTCTAAATCCCATAAATGCTTTATGGGGTTTTTCAGAATTTCTAGGGTCTTACATTGGCTTAGGTTCAGTGAGATCAATTCAACTCCTTTTCAC…
>rna-XR_001283168.2 gene=gene-LOC106416467 name=LOC106416467 seq_id=NC_027775.2 type=exon
GAGAGACGACGGTGGATGGAGGGAAAAAAAAGGGTTATCGGCGGTCTCGGATTCGCTTGGTGCAGGTCGGGAACTGATTGGCTGACACCGCCACGTGGATTTTCACGGTTGGCTTGTGAGCAGGGATCGGATCCTGCCTTCCATCAACTGAATCGGAGCCCGAGGTGAAAATACAAAAGTTTCCAACTTTCAGATCTGACATTAAACCTTGTTTAGTTTTGAAGCAGGGTACTCGATTGGCTAATTCGGTTAGATGTGTGATGCCCACTCTGTTTCTAAAGGCTGTGGATTTTGATGTAAAAACTCTCTAAATCCCATAAATGCTTTATGGGGTTTTTCAGAATTTCTAGGGTCTTACATTGGCTTAGGTTCAGTGAGATCAATTCAACTCCTTTTCAC…
>rna-XR_002661141.1 gene=gene-LOC111209711 name=LOC111209711 seq_id=NC_027775.2 type=exon
TCAAGTATGAAGATCTTTGGAGTCTTGTGCGTTGCGTCTTTTAGCTCATGAAACGGAACtctatatatcaattaaaatgtTCTGTCCCCTTTGCATGTAagagagataaagaaaccgACAAAAGCCATAAAGAAAGGGGACTCTCTGAATGAGCAAGAGATAAGGCTCCTCTTATCTTCTCATCAgatctttgtttctttgtttcttctttttttttttgcttttttggttatgttttttCTCGATTTAGACAAAAACCCTAGACTTGATTTTCCAAAAGGTGTCTTAAATAGTATCTCTTTCCTCTATTCATATGTGTGTATTTTCTCTCTATGGTTCCTTGTCTACTTTAATCTCTGGAGATGGAAGAACTGCGAGTGAATGAGTTgggacaaaaga…
>rna-XR_002661140.1 gene=gene-LOC111209711 name=LOC111209711 seq_id=NC_027775.2 type=exon
TCAAGTATGAAGATCTTTGGAGTCTTGTGCGTTGCGTCTTTTAGCTCATGAAACGGAACtctatatatcaattaaaatgtTCTGTCCCCTTTGCATGTAagagagataaagaaaccgACAAAAGCCATAAAGAAAGGGGACTCTCTGAATGAGCAAGAGATAAGGCTCCTCTTATCTTCTCATCAgatctttgtttctttgtttcttctttttttttttgcttttttggttatgttttttCTCGATTTAGACAAAAACCCTAGACTTGATTTTCCAAAAGGTGTCTTAAATAGTATCTCTTTCCTCTATTCATATATCTCTGGAGATGGAAGAACTGCGAGTGAATGAGTTgggacaaaagaaaaacatagcaACTGACAGAAGAGAGTGAGCACACAA…
>rna-XR_002661139.1 gene=gene-LOC111209711 name=LOC111209711 seq_id=NC_027775.2 type=exon
TCAAGTATGAAGATCTTTGGAGTCTTGTGCGTTGCGTCTTTTAGCTCATGAAACGGAACtctatatatcaattaaaatgtTCTGTCCCCTTTGCATGTAagagagataaagaaaccgACAAAAGCCATAAAGAAAGGGGACTCTCTGAATGAGCAAGAGATAAGGCTCCTCTTATCTTCTCATCAgatctttgtttctttgtttcttctttttttttttgcttttttggttatgttttttCTCGATTTAGACAAAAACCCTAGACTTGATTTTCCAAAAGATCTCTGGAGATGGAAGAACTGCGAGTGAATGAGTTgggacaaaagaaaaacatagcaACTGACAGAAGAGAGTGAGCACACAAAGGTAATTTGCATATACTGCATTTACTTCTCTTGC…
>rna-XR_002661288.1 gene=gene-LOC111209882 name=LOC111209882 seq_id=NC_027775.2 type=exon
CAAAGCCTGGCCATTGATTAAGACACGTTTCTCTTTCCGACGAACCATAACCAAGCGTTTCTCATCCGTACTCACTTTTCtctcctccctctctctctctgtttctcacCTTCTTTTCTGCTTCCAAAGAATCTAGCTTCAGTCCTAGGGTTTTACGATTCTCTATTTAACTTCCCTCTTCTTTCGATAGCGAGCAAACCGAGCCGACACATATACATTCTTTGCATGCAAGAGAGTGATAATACATATAAGATTAAAGGAAATAAACTCATCTGTTATCCGTTCCAGATTCAACCCTGAATGTATCTCCATCACCGATTTTTCTAgatccagtttttttttttctagattcAGTTCTTTCTAGACTAGGTtcttttgaaaccctaatttacaTTATTG…
>rna-XR_002661290.1 gene=gene-LOC111209884 name=LOC111209884 seq_id=NC_027775.2 type=exon
CACTCCCTGTCTAGTGCTTATCGTACACACCTATGCATATGTATGTAATGTATACGTACATACTCTTCTCTCactaaaaagattttaaaattaaataagcatctttttaccaaaaaaaagttagatCAGCATTTATGATAGAAAGTTAGTACAATATTGGTTTGTTGCGTCTGAGACTTTTCGACAGATCGGAAAATAACTAACCAGTCAGTATTTTTTTTCACGCAATTTTATTTGTCCCTACAAAAATGAATACGGTCTAAAACAGAATATTCCGTATTTTGTTTGGAAACGAACCATTTACAGATAGACACGTCAGCCCTTGGATTCTGGAACGTATTCTCTCTACTTCAGTCTTCAGCTATATATCTACTTTACTCGTCTCCTTGTTtctttcac…
>rna-XR_001272553.2 gene=gene-LOC106359524 name=LOC106359524 seq_id=NC_027764.2 type=exon
aaaactaaacatgTTTTGCAAGTGAATGGGAAAGAGATATCCTTAGGGACGAGAATCTAGCCAGCCTTGAGCATTTGCAAGTTTATGCGCTCGTAGACAAGCTTAATACACTACATGGAAGCATACGTTTGATTTCCGACCAATGGATCTATCCAAATTGTCCATCAACCACGTTTACGACCCATTTCTCCACCTCAACCAACACCAACGGAACATTTTGAACCGAGCTCAATGGTTGCAAACTTACATATTATGCCTTTGGAGTTGGTTATAAACTTTAGTCATTTGAATGTTGGGCTTCTGATAAATGGGTTTAACCCATGTTTCTAAATATTTGTGCACACTATATTTCGGGCCGTAGAGATGTCTCTCCCGTTGGCATTCAGCTAGGGTTTCTAA…
>rna-XR_001284807.2 gene=gene-LOC106424115 name=LOC106424115 seq_id=NC_027764.2 type=exon
tctctctctctctctcccctttaTATACCGACTGTGTCGCCATTGGCAGAAAGCAATGCTCATCAAACAGCTAGATCTCTGAGAATTAAAATACGATCGAATTGAGGATTTTCTCTTGTGTTCACTAGGGTTTGGAGAGATCTGTGAGAACGGGGAGTGAGGATGAGAGATTTTGAGTCTTTTTGCACAGAAAATCTATGtgggttttatttaattataagttGCTAGAAGACAGAGAAGAAATGCAACAGAGAAAACTGACAGAAGAGAGTGAGCACTTGCAAGGCACTGTTATGTGTCAATAACTTTGCGTGTGCGTGCTCACCTCTCTTTCTGTCAGTTGCCTGACTTctcgctttctctctctcttctctcaacTTTGTTGGCCTTTTTATCATC…
>rna-XR_001272725.2 gene=gene-LOC106360231 name=LOC106360231 seq_id=NC_027764.2 type=exon
AGTCCCATAGACTTTGTAAAATAGccaaactcttcttcttttctcccTTGATTCTTCTCCTTACTACTTTTGACGTTGCCTAAGAGTTTTGTAAGGATCCAGTGACCTTTCCCGGTAAAGTAAGTTTTTTGTGCCGACAATCAtttcttatataatttgatttgatgTATAGTTGATGCTACTCTTTTGTTCTCGATTTTCTGGAGCTGACTAGTGATAATCGGGTGAGACTGGTGTTGATGTAAAGGTAACGCGAGATATTAGTGCGGTTCAATCAAATAGTCGTACTCTTAGCTATTAGAGATCGGTTTTGTTCGATTGAGCCGTGCCAATATCACGCATAAAACCAACATGGCAAAGATGGTTATTACCCTTAAAAGTATATTGTCAGTCTTCTTT…
>rna-XR_002657824.1 gene=gene-LOC111205331 name=LOC111205331 seq_id=NC_027770.2 type=exon
TTCACTTTCCTCTCAAGTCTCtttatcatttttcatttttagtaacaagaaaaaaagaaagtagaGAAGAATCTGTAAAGCTCAGGAGGGATAGCGCCATCATATATAATCTCATTCACATCGATATTTTTGGCGCTGTCCATCCTGAGTTTCATTGGCTCTCCTTACTGCAGTGAAAAAGGCTTTCACAGATACATCAACAACttcaaaaatcaatatcaatTTTGTTTAGAGTTTCACTTTAGCTCTTTTAATATCACCACCACCTTTTTCTTgctttcttcctttttctctttGATCAAAGAAAATTAGTCTCTTTCTCCGGTGAAGTCAGCCACCAACAGGTATTCGAGAAGTAAATAATGTCAAAGGATGGATAGGTCTTCTTCTGTATATTTT…
>rna-XR_001279212.2 gene=gene-LOC106395336 name=LOC106395336 seq_id=NC_027770.2 type=exon
ttgtcttttttctttttcatatgtGCCAAGTAAAAAACCGGCTTAACGGTGAGTACCATGTTCTCTCTTCACGTACAATTCAATTCTATTTTCAGTCATTTGCcttctttgattcttttattttttatttttgatgttgAGTATGGGATAATAAGCAACGGATCGGCGAGAACGTATGAATATCTTACTAACGTAAAGACAATACGAGATATTGGTGCGGTTCAATCAGAAATCCACACTCTTTTGTTGTAGAGATCGGTTTGTTTGATTGAGCCGTGCCAATATCACGAGTGTAATTGGCCTCCACCATGCTAGCTGGTGTTCatcaagGTTCTGGAGTTCGGATAACACAAGAATGAGCGTAATCCTTGAATATAGACATCGATATACCTAATCTGC…
>rna-XR_002657946.1 gene=gene-LOC111205394 name=LOC111205394 seq_id=NC_027770.2 type=exon
AtttcttcattctctcttctaTCATCACCACTCacttatcttcttctccatctcgtctctctctctctgtttctctctaGATCTTAGCCGGGTCTTGTGGGAGGAGAAAACCGATAGAGAGATAATTTTAGATCATTACAAACCATACAAGGATTCTTCGATGGGAAGGGGCTTTCTCTTTTGAGGGGAATGTTGTTTGGCTCGAAGACTCTAGCTATTCATGTTAGATCTTCTTCGATCTAATCGAATCACACCTCCATGTTTGAGATCtgattaggattttagggtCGTCGGACCAGGCTTCATTCCCCCCAATTATTGCTCCCTGCTTACTCTCCAACGTaccttttttcttaatttagggtttcagatcTTGTGGTTGAACCCTTGTTAAAGATA…
>rna-XR_002652944.1 gene=gene-LOC111198823 name=LOC111198823 seq_id=NC_027762.2 type=exon
ATAACTTCCTCTCCTTCACTTTGCAGTCCCACAATCTTTCAAATAGCCACGTTCCTTTTTTTCTCCGTTGATGCTACTTTTGTCTTTGACGTTGCTGAAAGTAAGAGTTCTGCAAGGATCCGATGATGTTCACCGGTAACGCGAGATATTAGTGCGGTTCAATCAAATAGTCGTGTTCTCACTTGATAGAGATCGGTTTTGTTCGATTGAGCCGTGCCAATATCACGCGTCAACCCAAAACGGTAAAGATGGTTTTATTAACCGTGAAGGTATGTTGACACGCGACACAAACCCCAAAATCCAAGTACAACTGCGATATAACActtctatttttagaaagtaaataagaaattttaagcaaaaagaaaaatatgtagtAATAGCTAGAATGAAAATGTT…
>rna-XR_002652935.1 gene=gene-LOC111198781 name=LOC111198781 seq_id=NC_027762.2 type=exon
AACAAAACTTTGCCAGATATGGTAactgttctctctctctctatctctccttcttctttctatcttttcaattgagagagagagaagagaaggtccGAGGAGGAGGACTAAAAAGATGTTACGGCGGCCTCTGACTCGCTTGGTGCAGGTCGGGAACTGATTGGCTGACACCGCCACGTGGCTTTCCATGGTTGGCTTGTGAGCAGGGATCGGATCCCGCCTTGTATCAAGTGAATCCGAGTCCgacgtgaaaaaaaaaaaaaagtccacaGCTTTCAGATCTGACACACTCATCAAATATCTTGTAATTGGGGATTTATTCTTCTTTGTTAatcttttatttagttttgacGCATGATGATTAATGGCTATGCTCTTAAAATTTCAGGATCTAAGGTG…
>rna-XR_002655401.1 gene=gene-LOC111202409 name=LOC111202409 seq_id=NC_027767.2 type=exon
AGAAGCAACAGAGGAACCTTATCtctttaattataattattttttgaatctcttgattctTCAATTCTATTTTATTACAACTGGTGTATAGTTATTTCGCattaatttttagggttttcgcattaaatgaaaagaaaagaatacatCTCAAGTCTTCTTCCTTTCGATTTCGTTATTTTATTTCCTCTCATCTCTCTTCACCATCTTCTATATAAATCGAGAGCGAGGAGTCTTCTagtattcataatatatataccaaacAAAACATATGTATACACCTCCTCAATTCCATCTTTATTGTTACATTTGAGAAGAAAACTACCAGAAATATATGGCATCACATATATATCTGGTGTGGTTTTCATATACACATGCGTGTATATAGGGGAAGGCGTATGT…
>rna-XR_001280160.2 gene=gene-LOC106399790 name=LOC106399790 seq_id=NC_027771.2 type=exon
AATCTTTCAAATAGCCACGTTCCTTTTTTTCACCGTTGATGCTACTTTTGTCTTTGACGTTGCTGAAAGTAAGAATTCTGCAAGGATCCGATGATGTTCACCGGTAACGCGAGATATTAGTGCGGTTCAATCAAATAGTCGTGTTCTCACTTGATAGAGATCGGTTTTGTTCGATTGAGCCGTGCCAATATCACGCGTCAACCCAAAACGGCAAAGATGGTTTTATTAACCGTGAAGGTATGTTGACACGCGACACGCGACACAAACCCCAAAATCCAAGTACAGCTGCGATATAACActtctatttttagaaagtaaataaggaattttaagcaaaaaaaaaaaagtagtgaCATGCTACGAGTGTAAAAGTAATAGCTAGAATGAAAATGTTGTCGT…
>rna-XR_002658380.1 gene=gene-LOC111206228 name=LOC111206228 seq_id=NC_027771.2 type=exon
TTTTTGTGCCGACAATCAtttcttatataatttgatttgatgTATAGTTGATGCTACTCTTTTGTTCTCGATTTTCTGGAGCTGACTAGTGATAATCGGGTGAGACTGGTGTTGATGTAAAGGTAACGCGAGATATTAGTGCGGTTCAATCAAATAGTCGTACTCTTAGCTATTAGAGATCGGTTTTGTTCGATTGAGCCGTGCCAATATCACGCATAAAACCAACATGGCAAAGATGGTTATTAACTTATAAAGTATATTGTCAGTCTTCTTTAAGCTTCCAAGGTAGATGATGTTAACAAGtaacacaaaccacaaaatcCAAGTACAAGGGCGAAAACActtctatttttagaaagtatcAAAGGAATTTCAAGCAAAGAATATGTAGTAACATGC…
>rna-XR_002655830.1 gene=gene-LOC106375391 name=LOC106375391 seq_id=NC_027768.2 type=exon
CCATATTGAGTGAGTGTTTTGGGACAAGTTTTAGAGAAACGCAAAGAAACTGACAGAAGAGAGTGAGCACACAAAGGCACTTTGCATGTTCGATGCATTTGCTTCTCTTGCGTGCTCACTGCTCTATCTGTCAGGTTCCGGCACCGATTCTTTTTGGTCCGTTCACGTTTTCTTCTTTGATTGTGTTCCCATCTCTCTCATAGTCTCACCCACTTTCTTTCTCCATAGGTTTTGATTGTCTATGCCAGAGATGAACGCAGTGTTTACGGTAACCTATTAACTTGTACTTGGGAtgttgatttagggtttttgtgTCATGTTTTATCAGTTGATTGCCGCAGGTTtcacatatgtatatatgaatgaTCTAGTTTAGAGTCAGGATATTAAACAATGTTT…
>rna-XR_001275257.2 gene=gene-LOC106375391 name=LOC106375391 seq_id=NC_027768.2 type=exon
CCATATTGAGTGAGTGTTTTGGGACAAGTTTTAGAGAAACGCAAAGAAACTGACAGAAGAGAGTGAGCACACAAAGGCACTTTGCATGTTCGATGCATTTGCTTCTCTTGCGTGCTCACTGCTCTATCTGTCAGGTTCCGGCACCGATTCTTTTTGGTCCGTTCACGTTTTCTTCTTTGATTGTGTTCCCATCTCTCTCATAGTCTCACCCACTTTCTTTCTCCATAGGTTTTGATTGTCTATGCCAGAGATGAACGCAGTGTTTACGAAAACATGGAGGAGTCGAGCGAGAGGGTTGTTCGGTTAGAGCAACACGATGAGATCACGATGGGCGATGACTTGATTATCCATTCCATCCCACAGGACCTAGCACTAGCAGTATCGGCGATATATGATCTC…
>rna-XR_002655629.1 gene=gene-LOC111202735 name=LOC111202735 seq_id=NC_027768.2 type=exon
cacactcatATATCGAAGCCTGATGATGGACATGGGTGCCCATCGGAGTAAAGTTGCATGAAGTGGAGTAGAGTATAATGCAGCCAAGGATGACTTGCCGAAACGTCGTTCATCATGCGTATAGGTATTGGTGATGAACATATTTCTGGCAAGTTGTCCTTCGGCTACATTTTGCTCTCTTCTACTTATGCAAACTCTCCATGGTATATTCTacattttcattctttcaaaTGGACGATATCTCTCTTAATTAAGAAGGCGTTGGTGTTGATCAGATTATCCGAAGTCCAGCCTCGaAAACCTTCTTGGAGACACATACAAAAGAGGATAGACTTCTTGCAAAATCTGTAATGAATCCATTCCATCAAATAATGGACTTGAGcttcatgtttcttttt
>rna-XR_002656669.1 gene=gene-LOC111204292 name=LOC111204292 seq_id=NC_027769.2 type=exon
ACGAAGAACATTATTGCTGgtttaaaagagagaaaaatatctTCGAGGGTAGAGGACCTCGACAGGGTGGACATGAGAACACATGTGTATTCAAAGGCTGTAATGACGCCACGTCACTGTAACGTACATCTCTCTTTTCATGTGTTCTCAGGTCACCCCTGCTGAGCTCTTTCTCTACCATCCATCTTTATCAATGCTCGGTGGCTTCACTCATTCACCAAATGGGACAAATAATTCTGGAGTACGTAGTTTCTATCTGCAGTGTGGTTACAAGTTAAATGGgacaaagaagatgaaactCACGTTACGCACCTACCTTAACTTCACAAGTCATCAACACACCTTTACCAAATCATACCATCCACAAATCCCCCCACccaaaaaagagaaacaaaatgg…
>rna-XR_001278178.2 gene=gene-LOC106390022 name=LOC106390022 seq_id=NC_027769.2 type=exon
AATACATAAAAAGGGTGGCTTATATGAACAACAGaattaaatgtttaattcaTCAAATTAATAGAAAGGGAAAAAGTAGTCACACACAACACATATGGCCTTTTCGCCGGCTGTGTTACACACGCGCCACCTTTGAAAAGCCGGTTTACAGACCAGGTGTGCTCTTCTACCCAGTCACTATAAAACACGTGTTTGAAACTCTGTAGAACTCTTAGCAACGAGCCAAGGATTGGacaattcaaaacaaaacaaaagaaagaagatctctctctctctctctcccccctTTATATACGGACTATGTCGCCATTGGCAGAAAGCAATACTCATCAAACAGCTAGATCTCTGTGTTCACTAGGGTTTGGAGAGATCTGTGAGAACGGGGAGTGAGGATGAGAG…
>rna-XR_001271588.2 gene=gene-LOC106352368 name=LOC106352368 seq_id=NC_027765.2 type=exon
ATGCTCGATTACGATTACAAGTTGAGACACTTGTCGtctcttttctttccttttaatGTTTTGCTCTCTCCTCCCCCTCAAAACCCAACTTCtgataactaaaattttcattGGATAGCAATTCATATTCTCTGTATCTTCCgtaattaattaataagtttCGAGTATATAGCTAGGGTTGATGTGAGATTTGTATATCTAGATGGATCTATTTCTATGTTGGTTTTGGGAGGCTGAAGCTGCCAGCATGATCTGGTAATCGCTACATACgacatatatacatacacatgcTAATTTAATTTACTTCCACATATATCAATGTatctctcaaataatatataatcttttttttttttgctaacattTGGATCATATATAATCTTAGTgttaaaaatgtgt…
>rna-XR_001273409.2 gene=gene-LOC106365105 name=LOC106365105 seq_id=NC_027765.2 type=exon
TTTGTCTTGTATGTTCTCTCTCCGCTACTTCCCCTCATGAGTCCTTCTCTTCATAAAAACCTCTTATTTATTTATCCTTCTTATCATTCTCGTCATCATCATCTCAAcattcatctctttctctctctcttccttgatCCCAGCCGGATCTGATGGGTGTTGGGAGGGGACGAACAAAGACAGAAATAGAAAATTTCTTGTAAAACCCTAATAGAAAAAGTCTGGTTATAAAGACGAGAAGGATTTATAGAGGGATTTATCTTTTGAGGGGACTGTTGTCTGGCTCGAGGACTCTTATTCTAACTCAATCACGTTTTATAAAATCTACTTGATCTGATGattgattagggttttagtgtcTTCGGACCAGGCTTCATTCCCCCCAATTATTACTTCCTC…
>rna-XR_001274070.2 gene=gene-LOC106368582 name=LOC106368582 seq_id=NC_027765.2 type=exon
ACCATTTTACCTCATAAGatgaaactctataaattaaaatgttctGTTCAATTCAATGCCTCGGCAGACATCTGTTCCCTTTGCATGTAAGAGAGATAAAGAAAGCGACAAAAGCCATAAAGAAAGATCTCTAGAGTTGGATGAATTGTGAGTGAATGAGCTGGGGCAAAAGAAACACACAGAAACTGACAGAAGAGAGTGAGCACACAAAAGTAAATTGCATATGTTGCATTTGCTTCTCTTGCGTGCTCACTGCTCTTTCTGTCAGATTCCCGTGCTGATCTCTTTGGCCTGTCCTTGTTCCTCTTTGtctcagtctctctctctctcacatacacaagctctctctctctctcttgattaTTTCCAAACTAAGGTAAGAATATACCACTGAAATGA…
>rna-XR_002659848.1 gene=gene-LOC106407493 name=LOC106407493 seq_id=NC_027773.2 type=exon
TGTTAAGCATAATGGCCGACGAACAAGAATGATTGTTTGAACTCTTAACAACATACACACAAAAGGGTGGCTTATAGATGAGGTCTGACAGAAGAATTCACTGGACAAGATAAGTCGCAGACATATGAGTCCTATTTCGCCCGATGTGTTACACACGCGCCACCTCTGGAAAAGCTGGTTTAAAttgaactgttttttttttttgtaaaactaaatTGAACTGTTTATTTGACTGACCAGGTGTGCTCTTCTATCCACACAATAGAACACGTGTCTGAAACCctgttaaaagttaaaaactctCTTAACTGAGATTGGACCCTAAAAAAgacaattaaaagaaaagtgaaaaaaaCCACAATCTCCGCTATCTTCAaatcctttctctctctttatata…

## Sheet: pre-miRNAs (44)
>URS000062EB31_3708 Brassica napus (oilseed rape) mir-393 microRNA precursor family
AGAGAAAGGATCCAAAGGGATCGCATTGATCCTAATTAAGCTGAATTTATTCCCAAATAATTGTTATATTTTTCTCAATCTAAAGAAAAAGTCCCAAAAATCTGCTTCGTTTTCAGGATCATGCGATCTATTTGGATTCATCCTT
>URS000065CEA4_3708 Brassica napus (oilseed rape) mir-156 microRNA precursor
TTGACAGAAGAGAGTGAGCACACAAAGGGGGAATTGTATAAAATTAAGTTTGTTGTATATAGTTGCTTTTGCGTGCTCACTCTCTCTATGTCAT
>URS000066E4B5_3708 Brassica napus (oilseed rape) mir-156 microRNA precursor
CTGACAGAAGAGAGTGAGCACACAAAAGTAAATTGCATATGTTGCATTTGCTTCTCTTGCGTGCTCACTGCTCTTTCTGTCAG
>URS000067E485_3708 Brassica napus (oilseed rape) mir-166 microRNA precursor
TTTGAGGGGAATGTTGTTTGGCTCGAAGACTCTAGCTTATCATGTTAGATCTTCTTCGATTTAATCGAATCAAACCTCCATGTTTGAGATCTGATTTAGGATTTTAGGGTCGTCGGACCAGGCTTCATTCCCCCCAAT
>URS000068D02E_3708 Brassica napus (oilseed rape) mir-166 microRNA precursor
TTTGAGGGGACTGTTGTCTGGCTCGAGGACTCTTATTCTAACTCAATCACGTTTTATAAAATCTACTTGATCTGATGATTGATTAGGGTTTTAGTGTCTTCGGACCAGGCTTCATTCCCCCCAAT
>URS00006A2B1C_3708 Brassica napus (oilseed rape) mir-156 microRNA precursor
CTGACAGAAGAGAGTGAGCACACAAAAGTAATCTGCATATACTGCATTTGCTTCTCTTGCGTGCTCACTGCTCTTTCTGTCAG
>URS00006AF63E_3708 Brassica napus (oilseed rape) mir-172 microRNA precursor family
TTGTTTGCTGCTGTGGCATCATCAAGATTCACATCGCCAGATGGACGGTGGTGATTCACCCTCCCCAAAGTTCTCTGATGAAAATGAGAATCTTGATGATGCTGCATCGGAAATCAA
>URS00006C390D_3708 Brassica napus (oilseed rape) mir-156 microRNA precursor
CTGACAGAAGAGAGTGAGCACACAAAGGCACTTTGCATGTTCGATGCATTTGCTTCTCTTGCGTGCTCACTGCTCTATCTGTCAG
>URS00006CB805_3708 Brassica napus (oilseed rape) mir-156 microRNA precursor
CTGACAGAAGAGAGTGAGCACTTGCAAGGCACTGTTATGTGTCAATAACTTTGCGTGTGCGTGCTCACCTCTCTTTCTGTCAG
>URS00006CE9CA_3708 Brassica napus (oilseed rape) microRNA MIR171_1
GGTAACGCGAGATATTAGTGCGGTTCAATCAAATAGTCGTACTCTTAGCTATTAGAGATCGGTTTTGTTCGATTGAGCCGTGCCAATATCACGCATAAAACC
>URS00006EBDE7_3708 Brassica napus (oilseed rape) mir-160 microRNA precursor family
TCGTGCCTGGCTCCCTGTATGCCACAAGTATATACCGATCTCGTTACGAAATCTGTGGCTAGTGGCGTACAGAGTAGTCAAGCATGA
>URS00006F0668_3708 Brassica napus (oilseed rape) microRNA MIR158
GCACGTTATATCTGTTCTTCTTTGTCTATCGTTTGGAAAAGATTGATGACGCTATCTACACTTTTCCAAATGTAGACAAAGCAAAACCGTGATGACGTCGT
>URS00006F6740_3708 Brassica napus (oilseed rape) mir-172 microRNA precursor family
TTGTTTGCTGCTGTGGCATCATCAAGATTCACATCCGTTGATGGACGGTGGTGGTTCACTCTACCCAAAGTTCTCTTGTGAAAATGGGAATCTTGATGATGCTGCATCGGTAATCAA
>URS00006FB1FC_3708 Brassica napus (oilseed rape) mir-172 microRNA precursor family
CTTTTTGTAGGTGCAGCACCATCAAGATTCACATGGAAATTGAAAAACCCCTAATCTTATTAATTAGGGTTTTGATATGTATATATGAGAATCTTGATGATGCTGCATCAACAACAGA
>URS000070A050_3708 Brassica napus (oilseed rape) microRNA MIR171_1
GGTAACGCGAGATATTAGTGCGGTTCAATCAAATAGTCGTGTTCTCACTTGATAGAGATCGGTTTTGTTCGATTGAGCCGTGCCAATATCACGCGTCAACCC
>URS000071125E_3708 Brassica napus (oilseed rape) mir-160 microRNA precursor family
TCATGCCTGGCTCCCTGTATGCCACAAGTAAATACCGATCTCATTATGAAATCGGACACTAGTGGCGTACAGAGTAGTCAAGCATAA
>URS00007202A6_3708 Brassica napus (oilseed rape) microRNA MIR168
GTTACGGCGGCCTCTGACTCGCTTGGTGCAGGTCGGGAACTGATTGGCTGACACCGCCACGTGGCTTTCCATGGTTGGCTTGTGAGCAGGGATCGGATCCCGCCTTGTATCAAGTGAATCCGAGTCCGACGTGAAA
>URS000075A889_3708 Brassica napus miR171b stem-loop (bna-MIR171b)
GGTAACGCGAGATATTAGTGCGGTTCAATCAAATAGTCGTGTTCTCACTTGATAGAGATCGGTTTTGTTCGATTGAGCCGTGCCAATATCACGCGTCAACC
>URS000075DD06_3708 Brassica napus miR171c stem-loop (bna-MIR171c)
GCGAGATATTAGTGCGGTTCAATCAAATAGTCGTACTCTTAGCTATTAGAGATCGGTTTTGTTCGATTGAGCCGTGCCAATATCACGC
>URS00007E39EC_3708 Brassica napus miR156e stem-loop (bna-MIR156e)
GAAATGCAACAGAGAAAACTGACAGAAGAGAGTGAGCACTTGCAAGGCACTGTTATGTGTCAATAACTTTGCGTGTGCGTGCTCACCTCTCTTTCTGTCAGTTGCCTGACTTCTCGCTT
>URS00007E3A74_3708 Brassica napus miR168a stem-loop (bna-MIR168a)
TTACGGCGGCCTCTGACTCGCTTGGTGCAGGTCGGGAACTGATTGGCTGACACCGCCACGTGGCTTTCCATGGTTGGCTTGTGAGCAGGGATCGGATCCCGCCTTGTATCAAGTGAATCCGAGTCCGACGTGA
>URS0000BE85B4_3708 Brassica napus (rape) microRNA MIR169_2
AGAGTATAATGCAGCCAAGGATGACTTGCCGAAACGTCGTTCATCATGCGTATAGGTATTGGTGATGAACATATTTCTGGCAAGTTGTCCTTCGGCTACATTTTGCTCTCT
>URS0000BFB839_3708 Brassica napus (rape) microRNA MIR169_2
AAAGTAGTGTGCAGCCAAGGATGACTTGCCGATTTATAATATCTTTATAAAAACTTTGTTAAGATATTTTTTTTTTCAAATTCATTGGTTTTGAGAAGTTAGGAATAATTAGGATATACATTTATTTCTTTTTTTTTTACATTTATTTCGCATAAAGAAAATTAACATGATCGGCAAGTTGCCCTTGGCTATACGCTTCTTTGT
>URS0000C0A029_3708 Brassica napus (oilseed rape) microRNA MIR171_1
GGTCAAGCGAGATATTAGTGCGGTTCAATCAAATAGTCGCACTCTTAGTAGATAGAGATTGATTTTGTTCGATTGAGCCGTGCCAATATCACGCATATAACC
>URS0000C0CBA0_3708 Brassica napus (oilseed rape) mir-156 microRNA precursor
CTGACAGAAGAGAGTGAGCACACAAAGGTAATTTGCATATACTGCATTTACTTCTCTTGCGTGCTCACTGCTCTTTCTGTCAG
>URS0000C15F5A_3708 Brassica napus (oilseed rape) mir-172 microRNA precursor family
TTTTCTGTAGGTGCAGCACCATTAAGATTCACATGGAAATTGAAAAAACCCTAAATTATATTAATTAGGGTTCTGATATGTATATGAGAATCTTGATGATGCTGCATCAACAACCAA
>URS0000C17E06_3708 Brassica napus (rape) microRNA MIR167_1
GGTTTTGGGAGGCTGAAGCTGCCAGCATGATCTGGTAATCGCTACATACGACATATATACATACACATGCTAATTTAATTTACTTCCACATATATCAATGTATCTCTCAAATAATATATAATCTTTTTTTTTTTTGCTAACATTTGGATCATATATAATCTTAGTGTTAAAAATGTGTTTTCTCCTCTTTTTCATGGATGCATGCATGTATGTGTGTGTATAAGTGTATAGATAGTGGTACCAGATCATCCTGCGGCTTCATTCACTCAAATC
>URS0000C1A2AB_3708 Brassica napus (oilseed rape) microRNA MIR168
TTATCGGCGGTCTCGGATTCGCTTGGTGCAGGTCGGGAACTGATTGGCTGACACCGCCACGTGGATTTTCACGGTTGGCTTGTGAGCAGGGATCGGATCCTGCCTTCCATCAACTGAATCGGAGCCCGAGGTGAAA
>URS0000C1E5DF_3708 Brassica napus (oilseed rape) microRNA MIR398
AGGACCTCGACAGGGTGGACATGAGAACACATGTGTATTCAAAGGCTGTAATGACGCCACGTCACTGTAACGTACATCTCTCTTTTCATGTGTTCTCAGGTCACCCCTGCTGAGCTCTT
>URS0000C3F68C_3708 Brassica napus (oilseed rape) microRNA MIR171_1
GACAATACGAGATATTGGTGCGGTTCAATCAGAAATCCACACTCTTTTGTTGTAGAGATCGGTTTGTTTGATTGAGCCGTGCCAATATCACGAGTGTAATT
>URS0000C3F7C3_3708 Brassica napus (oilseed rape) mir-156 microRNA precursor
CTGACAGAAGAGAGGGAGCACATGCAGGCACTGTTATGTGTCCATAACTCTGCTTGTGCGTGCTCACCTCTCTTTCTGTCAG
>URS0000C55383_3708 Brassica napus (rape) microRNA MIR167_1
GGTTTTGAGAGGCTGAAGCTGCCAGCATGATCTGGTAATCGCTACATACGACATATATACATATACATACTAATTTAATTTACACATGTATCAATGTATCCAGGGCCGGCTGAGGCGCAGGTACAAGGGGGCGTGGACCCAGGGTCCAAATTTTTTTTTTCATAATTAGTGTTAAAATGGAGCTTGATTTTCAAAAAAAAAAAATTTAAAAGAGTCCAAAATTTTTAATTTATTTATAGAGTATATGTAAAACTTTTTTTTTGAAAAATTATTTTGTCCAAGGGCCTATAATTTACATGAGCTGGCCCTGGATGTATCTCTCAAATTAATATAATCTTAGTGTTAAAAATGTGTTTTCTCCTCTTTTTCATGGATGCATGCATGTATGTGTGTGTATAA…
>URS0000C56276_3708 Brassica napus (oilseed rape) microRNA MIR390
GAGAAGAATCTGTAAAGCTCAGGAGGGATAGCGCCATCATATATAATCTCATTCACATCGATATTTTTGGCGCTGTCCATCCTGAGTTTCATTGGCTCTCCTT
>URS0000C58CDC_3708 Brassica napus (oilseed rape) mir-160 microRNA precursor family
TCGTGCCTGGCTCCCTGTATACCACAAGCAAACACCGATCTCATTATGAAATCGATCGCTAGTGGTGTATAGAGTAGTCAAGCATGA
>URS0000C5BDCD_3708 Brassica napus (oilseed rape) mir-156 microRNA precursor
CTGACAGAAGAGAGTGAGCACATGCAGGCACTGTTATGTGTCCATAACTTTGCTTGTGCGTGCTCACCTCTCTTTCTGTCAG
>URS0000C66F51_3708 Brassica napus (oilseed rape) microRNA MIR390
GAGAAGTAGCTGTAAAGCTCAGGAGGGATAGCGCCATGTCTCACCAGTACTATGAAATGTTTGTATATCTATATTGGCGCTATCCATCCTGAGTTCTATGGCTTCTTCTT
>URS0000C7FFEE_3708 Brassica napus (oilseed rape) mir-160 microRNA precursor family
TCGTGCCTGGCTCCCTGTATACCACAAGAAAACACCGATCTCATTATGAAATCGATCGCTAGTGGTGTATAGAGTAGTCAAGCATGA
>URS0000C81832_3708 Brassica napus (oilseed rape) mir-156 microRNA precursor
CTGACAGAAGAGAGTGAGCACACAAAAGTAATTTGCATATGTTGTATTTGCGATCTCTTGCGTGCTCACTGCTCTTTCTGTCAG
>URS0000C86968_3708 Brassica napus (oilseed rape) mir-166 microRNA precursor
TTTGAGGGGAATGTTGTTTGGCTCGAAGACTCTAGCTATTCATGTTAGATCTTCTTCGATCTAATCGAATCACACCTCCATGTTTGAGATCTGATTAGGATTTTAGGGTCGTCGGACCAGGCTTCATTCCCCCCAAT
>URS0000D4FF1A_3708 Brassica napus miR160c stem-loop (bna-MIR160c)
GTGTGTGCTCTTATGGTCGTGCCTGGCTCCCTGTATGCCACAAGTATATACCGATCTCGTTACGAAATCTGTGGCTAGTGGCGTACAGAGTAGTCAAGCATGACCAAAGCTTTTC
>URS0000D5049C_3708 Brassica napus miR393 stem-loop (bna-MIR393)
TCCAAAGGGATCGCATTGATCCTAATCAAGCTGAGTTATTCCCGAATAATTATTTTAATTTTTTCTCAATGGAAAGATAGAAAAAAAAAATTTTGCTTCGTTTTCCGGATCATGCGATCTCTTCGGA
>URS0000D521E1_3708 Brassica napus miR156d stem-loop (bna-MIR156d)
CGCAAAGAAACTGACAGAAGAGAGTGAGCACACAAAGGCACTTTGCATGTTCGATGCATTTGCTTCTCTTGCGTGCTCACTGCTCTATCTGTCAGGTTCCGGCACCGATT
>URS0000D56A90_3708 Brassica napus miR156a stem-loop (bna-MIR156a)
TGACAGAAGAGAGTGAGCACACAAAAGTAATCTGCATATACTGCATTTGCTTCTCTTGCGTGCTCACTGCTCTTTCTGTCAG
>URS0000D752C2_3708 Brassica napus (oilseed rape) mir-156 microRNA precursor
TTGACAGAAGAGAGCGAGCACACAAAGGGAGAATTGTATAAAATTAATTTGTATATGGTTTACTTTTGCGTGCTCATTCTCGTTCTGTCAT

## Sheet: pri-miRNA and encoding genes
Weak infection level	>rna-XR_001273710.2 gene-LOC106366705 name=LOC106366705 seq_id=NW_019168592.1 type=exon
	GTGTGGGTGTGAAGATGTTCGATTACGATTACAAGTTGAGACACCTGTCGTCTCTTTTCTTTCCTTGTAATGTTTTggtctctcctcctcctcaaaaccCAACTTCtgataactaaaattttcattGGATAGCAATTCATTTCTCTGTATTTCCgtaattaattaataagtttCGATTATATAGCTAGGGTTGATGTGAGATTTGTATATCTAGATGGATCTATTTCTATGTTGGTTTTGAGAGGCTGAAGCTGCCAGCATGATCTGGTAATCGCTACATAcgacatatatacatatacatactAATTTAATTTACACATGTATCAATGTATCCAGGGCCGGCTGAGGCGCAGGTACAAGGGGGCGTGGACCCAgggtccaaattttttttttcataat…
	>rna-XR_001273707.2 gene-LOC106366705 name=LOC106366705 seq_id=NW_019168592.1 type=exon
	TGTGGGTGTGAAGATGTTCGATTACGATTACAAGTTGAGACACCTGTCGTCTCTTTTCTTTCCTTGTAATGTTTTggtctctcctcctcctcaaaaccCAACTTCtgataactaaaattttcattGGATAGCAATTCATTTCTCTGTATTTCCgtaattaattaataagtttCGATTATATAGCTAGGGTTGATGTGAGATTTGTATATCTAGATGGATCTATTTCTATGTTGGTTTTGAGAGGCTGAAGCTGCCAGCATGATCTGGTAATCGCTACATAcgacatatatacatatacatactAATTTAATTTACACATGTATCAATGTATCCAGGGCCGGCTGAGGCGCAGGTACAAGGGGGCGTGGACCCAgggtccaaattttttttttcataatt…
	>rna-XR_001273708.2 gene-LOC106366705 name=LOC106366705 seq_id=NW_019168592.1 type=exon
	GTGGGTGTGAAGATGTTCGATTACGATTACAAGTTGAGACACCTGTCGTCTCTTTTCTTTCCTTGTAATGTTTTggtctctcctcctcctcaaaaccCAACTTCtgataactaaaattttcattGGATAGCAATTCATTTCTCTGTATTTCCgtaattaattaataagtttCGATTATATAGCTAGGGTTGATGTGAGATTTGTATATCTAGATGGATCTATTTCTATGTTGGTTTTGAGAGGCTGAAGCTGCCAGCATGATCTGGTAATCGCTACATAcgacatatatacatatacatactAATTTAATTTACACATGTATCAATGTATCCAGGGCCGGCTGAGGCGCAGGTACAAGGGGGCGTGGACCCAgggtccaaattttttttttcataatta…
	>rna-XR_002661141.1 gene-LOC111209711 name=LOC111209711 seq_id=NC_027775.2 type=exon
	TCAAGTATGAAGATCTTTGGAGTCTTGTGCGTTGCGTCTTTTAGCTCATGAAACGGAACtctatatatcaattaaaatgtTCTGTCCCCTTTGCATGTAagagagataaagaaaccgACAAAAGCCATAAAGAAAGGGGACTCTCTGAATGAGCAAGAGATAAGGCTCCTCTTATCTTCTCATCAgatctttgtttctttgtttcttctttttttttttgcttttttggttatgttttttCTCGATTTAGACAAAAACCCTAGACTTGATTTTCCAAAAGGTGTCTTAAATAGTATCTCTTTCCTCTATTCATATGTGTGTATTTTCTCTCTATGGTTCCTTGTCTACTTTAATCTCTGGAGATGGAAGAACTGCGAGTGAATGAGTTgggacaaaaga…
	>rna-XR_002661140.1 gene-LOC111209711 name=LOC111209711 seq_id=NC_027775.2 type=exon
	TCAAGTATGAAGATCTTTGGAGTCTTGTGCGTTGCGTCTTTTAGCTCATGAAACGGAACtctatatatcaattaaaatgtTCTGTCCCCTTTGCATGTAagagagataaagaaaccgACAAAAGCCATAAAGAAAGGGGACTCTCTGAATGAGCAAGAGATAAGGCTCCTCTTATCTTCTCATCAgatctttgtttctttgtttcttctttttttttttgcttttttggttatgttttttCTCGATTTAGACAAAAACCCTAGACTTGATTTTCCAAAAGGTGTCTTAAATAGTATCTCTTTCCTCTATTCATATATCTCTGGAGATGGAAGAACTGCGAGTGAATGAGTTgggacaaaagaaaaacatagcaACTGACAGAAGAGAGTGAGCACACAA…
	>rna-XR_002661139.1 gene-LOC111209711 name=LOC111209711 seq_id=NC_027775.2 type=exon
	TCAAGTATGAAGATCTTTGGAGTCTTGTGCGTTGCGTCTTTTAGCTCATGAAACGGAACtctatatatcaattaaaatgtTCTGTCCCCTTTGCATGTAagagagataaagaaaccgACAAAAGCCATAAAGAAAGGGGACTCTCTGAATGAGCAAGAGATAAGGCTCCTCTTATCTTCTCATCAgatctttgtttctttgtttcttctttttttttttgcttttttggttatgttttttCTCGATTTAGACAAAAACCCTAGACTTGATTTTCCAAAAGATCTCTGGAGATGGAAGAACTGCGAGTGAATGAGTTgggacaaaagaaaaacatagcaACTGACAGAAGAGAGTGAGCACACAAAGGTAATTTGCATATACTGCATTTACTTCTCTTGC…
	>rna-XR_001284807.2 gene-LOC106424115 name=LOC106424115 seq_id=NC_027764.2 type=exon
	tctctctctctctctcccctttaTATACCGACTGTGTCGCCATTGGCAGAAAGCAATGCTCATCAAACAGCTAGATCTCTGAGAATTAAAATACGATCGAATTGAGGATTTTCTCTTGTGTTCACTAGGGTTTGGAGAGATCTGTGAGAACGGGGAGTGAGGATGAGAGATTTTGAGTCTTTTTGCACAGAAAATCTATGtgggttttatttaattataagttGCTAGAAGACAGAGAAGAAATGCAACAGAGAAAACTGACAGAAGAGAGTGAGCACTTGCAAGGCACTGTTATGTGTCAATAACTTTGCGTGTGCGTGCTCACCTCTCTTTCTGTCAGTTGCCTGACTTctcgctttctctctctcttctctcaacTTTGTTGGCCTTTTTATCATC…
	>rna-XR_001278178.2 gene-LOC106390022 name=LOC106390022 seq_id=NC_027769.2 type=exon
	AATACATAAAAAGGGTGGCTTATATGAACAACAGaattaaatgtttaattcaTCAAATTAATAGAAAGGGAAAAAGTAGTCACACACAACACATATGGCCTTTTCGCCGGCTGTGTTACACACGCGCCACCTTTGAAAAGCCGGTTTACAGACCAGGTGTGCTCTTCTACCCAGTCACTATAAAACACGTGTTTGAAACTCTGTAGAACTCTTAGCAACGAGCCAAGGATTGGacaattcaaaacaaaacaaaagaaagaagatctctctctctctctctcccccctTTATATACGGACTATGTCGCCATTGGCAGAAAGCAATACTCATCAAACAGCTAGATCTCTGTGTTCACTAGGGTTTGGAGAGATCTGTGAGAACGGGGAGTGAGGATGAGAG…
	>rna-XR_001271588.2 gene-LOC106352368 name=LOC106352368 seq_id=NC_027765.2 type=exon
	ATGCTCGATTACGATTACAAGTTGAGACACTTGTCGtctcttttctttccttttaatGTTTTGCTCTCTCCTCCCCCTCAAAACCCAACTTCtgataactaaaattttcattGGATAGCAATTCATATTCTCTGTATCTTCCgtaattaattaataagtttCGAGTATATAGCTAGGGTTGATGTGAGATTTGTATATCTAGATGGATCTATTTCTATGTTGGTTTTGGGAGGCTGAAGCTGCCAGCATGATCTGGTAATCGCTACATACgacatatatacatacacatgcTAATTTAATTTACTTCCACATATATCAATGTatctctcaaataatatataatcttttttttttttgctaacattTGGATCATATATAATCTTAGTgttaaaaatgtgt…
	>rna-XR_001274070.2 gene-LOC106368582 name=LOC106368582 seq_id=NC_027765.2 type=exon
	ACCATTTTACCTCATAAGatgaaactctataaattaaaatgttctGTTCAATTCAATGCCTCGGCAGACATCTGTTCCCTTTGCATGTAAGAGAGATAAAGAAAGCGACAAAAGCCATAAAGAAAGATCTCTAGAGTTGGATGAATTGTGAGTGAATGAGCTGGGGCAAAAGAAACACACAGAAACTGACAGAAGAGAGTGAGCACACAAAAGTAAATTGCATATGTTGCATTTGCTTCTCTTGCGTGCTCACTGCTCTTTCTGTCAGATTCCCGTGCTGATCTCTTTGGCCTGTCCTTGTTCCTCTTTGtctcagtctctctctctctcacatacacaagctctctctctctctcttgattaTTTCCAAACTAAGGTAAGAATATACCACTGAAATGA…
	>rna-XR_002659848.1 gene-LOC106407493 name=LOC106407493 seq_id=NC_027773.2 type=exon
	TGTTAAGCATAATGGCCGACGAACAAGAATGATTGTTTGAACTCTTAACAACATACACACAAAAGGGTGGCTTATAGATGAGGTCTGACAGAAGAATTCACTGGACAAGATAAGTCGCAGACATATGAGTCCTATTTCGCCCGATGTGTTACACACGCGCCACCTCTGGAAAAGCTGGTTTAAAttgaactgttttttttttttgtaaaactaaatTGAACTGTTTATTTGACTGACCAGGTGTGCTCTTCTATCCACACAATAGAACACGTGTCTGAAACCctgttaaaagttaaaaactctCTTAACTGAGATTGGACCCTAAAAAAgacaattaaaagaaaagtgaaaaaaaCCACAATCTCCGCTATCTTCAaatcctttctctctctttatata…
Moderate infection level	>rna-XR_001273710.2 gene-LOC106366705 name=LOC106366705 seq_id=NW_019168592.1 type=exon
	GTGTGGGTGTGAAGATGTTCGATTACGATTACAAGTTGAGACACCTGTCGTCTCTTTTCTTTCCTTGTAATGTTTTggtctctcctcctcctcaaaaccCAACTTCtgataactaaaattttcattGGATAGCAATTCATTTCTCTGTATTTCCgtaattaattaataagtttCGATTATATAGCTAGGGTTGATGTGAGATTTGTATATCTAGATGGATCTATTTCTATGTTGGTTTTGAGAGGCTGAAGCTGCCAGCATGATCTGGTAATCGCTACATAcgacatatatacatatacatactAATTTAATTTACACATGTATCAATGTATCCAGGGCCGGCTGAGGCGCAGGTACAAGGGGGCGTGGACCCAgggtccaaattttttttttcataat…
	>rna-XR_001273707.2 gene-LOC106366705 name=LOC106366705 seq_id=NW_019168592.1 type=exon
	TGTGGGTGTGAAGATGTTCGATTACGATTACAAGTTGAGACACCTGTCGTCTCTTTTCTTTCCTTGTAATGTTTTggtctctcctcctcctcaaaaccCAACTTCtgataactaaaattttcattGGATAGCAATTCATTTCTCTGTATTTCCgtaattaattaataagtttCGATTATATAGCTAGGGTTGATGTGAGATTTGTATATCTAGATGGATCTATTTCTATGTTGGTTTTGAGAGGCTGAAGCTGCCAGCATGATCTGGTAATCGCTACATAcgacatatatacatatacatactAATTTAATTTACACATGTATCAATGTATCCAGGGCCGGCTGAGGCGCAGGTACAAGGGGGCGTGGACCCAgggtccaaattttttttttcataatt…
	>rna-XR_001273708.2 gene-LOC106366705 name=LOC106366705 seq_id=NW_019168592.1 type=exon
	GTGGGTGTGAAGATGTTCGATTACGATTACAAGTTGAGACACCTGTCGTCTCTTTTCTTTCCTTGTAATGTTTTggtctctcctcctcctcaaaaccCAACTTCtgataactaaaattttcattGGATAGCAATTCATTTCTCTGTATTTCCgtaattaattaataagtttCGATTATATAGCTAGGGTTGATGTGAGATTTGTATATCTAGATGGATCTATTTCTATGTTGGTTTTGAGAGGCTGAAGCTGCCAGCATGATCTGGTAATCGCTACATAcgacatatatacatatacatactAATTTAATTTACACATGTATCAATGTATCCAGGGCCGGCTGAGGCGCAGGTACAAGGGGGCGTGGACCCAgggtccaaattttttttttcataatta…
	>rna-XR_002658214.1 gene-LOC111205685 name=LOC111205685 seq_id=NC_027758.2 type=exon
	aagaaacattttatttttaaaggtaATTATATTGTTCcagttataaataaatttattcatatttgCCTTCAGATCCAACTTTCGTTCCCTCTTTCGAATTTTTTTAAGTACCAGCAAAGTTTGGTTAATTCTTTCCCCCTCTATATATTTGTACCTCCACTCCTCTTACATCTCCACAAATCCTTGACAAAGAATAATTCTTCGGTTTCATTTTCCTCCCATCCAAATAAAATTACATACATATGTTTATTATGTTCCCTTTAAAACCGACGCATAAGCCATCCAACATTCATATTTAGAAGTCTTGTATACGTAACGTATGGAATAATAGTCGTGCCTGGCTCCCTGTATACCACAAGCAAACACCGATCTCATTATGAAATCGATCGCTAGTGGTGT…
	>rna-XR_002660319.1 gene-LOC111208321 name=LOC111208321 seq_id=NC_027757.2 type=exon
	CCATTTATACACACGTCTCCAGAAATCCTTGACAAAGAATAACTCCATTTTTTCTCTGGTTCCATTTCTCCCACCCAAATGAAACTacagaaacatttttttttctattggaATCAAGACCGAACGACTATATAAGCCATCCATGATTCATATTTGGAAGTCTGGTATACACCACACATATATATGATACGAAGTCATGCCTGGCTCCCTGTATGCCACAAGTAAATACCGATCTCATTATGAAATCGGACACTAGTGGCGTACAGAGTAGTCAAGCATAACCACTGATATTCTTGATATATGAGTACTTTGTTTTTGTAACACAAGATATATATGTGTGGATGGTGGCTAGCTATAAGATATATGTTATATGCATGGATTATGTCTAGAACTGTTATA…
	>rna-XR_002660886.1 gene-LOC111209134 name=LOC111209134 seq_id=NC_027774.2 type=exon
	TTGGTTAATTCTTTCCCCCTCTATATATTTGTACCTCCACTCGTCTTACATCTCCACAAATCCTTGACAAAGAATAATTCTTCGGTTTCATTTTCCTCCCCATCCAAATAAAATTACATACACATGTTTATTATGTTCCCTTTACAACCGACGCATAAGCCATCCAACATTCATATTTAGAAGTcttgtatacatatatactacGTATGGAATAATAGTCGTGCCTGGCTCCCTGTATACCACAAGAAAACACCGATCTCATTATGAAATCGATCGCTAGTGGTGTATAGAGTAGTCAAGCATGACCAAAGCTTTTCTTGATATATAAGTACTTTGTCTTTGTAACGCATAATGTCTATAAAATTTCTGGTATATGTATGCATGaattatgtttagaaa…
	>rna-XR_001272838.2 gene-LOC106360797 name=LOC106360797 seq_id=NC_027774.2 type=exon
	GAAAAAACACCATTGCTcccacttagagagagagagagagagaaagaaagagagttcTTCACAGGCTCAGAGCAACTAGAGAAAGGATCCAAAGGGATCGCATTGATCCTAATTAAGCTGAATTTATTCCCaaataattgttatatttttctcaatCTAAAGAAAAAGTCCCAAAAATCTGCTTCGTTTTCAGGATCATGCGATCTATTTGGATTCATCCTTTGGTTGCTTCCATTTTGGTCAAAGTGTTTCACTGCCGGGGACTTCACCGGCGGGAAAATCTCCAGTGGGTCGATCCATGCCTCTTGGTCAGCGCAGGGAACTAGCCAACTTGGTGCAAAACAGTTGACGAATGGGGACCCAAAAACTCGTGATCTTCCTCCTTTAGCAAGGGAGTCA…
	>rna-XR_001278112.2 gene-LOC106389769 name=LOC106389769 seq_id=NC_027774.2 type=exon
	CCTCATAAGatgaaactctataaattaaaatgttctGTTCAATTCAATGCCTCGCCAGACATCTGTTCCCTTTGCATGTAAGAGAGATAAAGAAAGCGACAAAAGCCATAAAGAAAGATAAGACTCTTTGAATGATAGAGAGATAAGGCTCCTCTTATCTTCTCAACAgatctttgtttctttcttcttttcttttcgttttttccttttttggttATGTTTGTTCTCGATTTAGACAAAAAAACCCTAGACTTGATCTTCCAAAGGGTGTCTGAATTTCTTCCCTTTGTACAGATTTGTATTCTTTCTCTTTGTGGTTCTTTGCCTTCTTTAGTTAAAACTTAGATCTAACCATTAATCTCTTATCTTTTCACTGACCCAATGACTCTTATTCTTCGT…
	>rna-XR_001282809.2 gene-LOC106414208 name=LOC106414208 seq_id=NC_027774.2 type=exon
	TTGCAGTCTCATAGACTTTGCAAATAGCCACCTTCTTTtctctcctctgtttcttctacTTAGTACTTTTTGTTTTGGACGTTGCTGAAAATAAGAGTTCTGCGCGGATCCGATGATCTTCACCGCTAGTGATGAAAATCGGATGAGACGGGTTTTGGTTGTGATGTAAGCTGGTCAAGCGAGATATTAGTGCGGTTCAATCAAATAGTCGCACTCTTAGTAGATAGAGATTGATTTTGTTCGATTGAGCCGTGCCAATATCACGCATATAACCAAGATGGTTATTAACCTCAAAAGTATATTGTCAATCATCTTAAAGAGTGATAGAGCTCAAGGTACTCAAGTGCAGGACGATTCCATGACCAGCCTTGCTTCATCAGTGATTTAAACCACTCTCTA…
	>rna-XR_002664208.1 gene-LOC111215065 name=LOC111215065 seq_id=NC_027760.2 type=exon
	CTTTGGAGTCTTGTGCGTTGCGTCTTTTAGCTCATGAAACGAAACtctatatatcaattaaaatgtTCTGTCCCCTTTGCATGTAAGAGAGATAAACAAACCGACAAAAGCCATAAAGAAAGATCTCTGGAGATGGAAGAACTGCGAGTGAATGAGTTgggacaaaagaaaaacatagcaACTGACAGAAGAGAGTGAGCACACAAAAGTAATCTGCATATACTGCATTTGCTTCTCTTGCGTGCTCACTGCTCTTTCTGTCAGATTCTAGTGCTGATCTCTTTGGCCTGTCCTTGTTCTCTTTgtctcaatctctctctctctctctcacatacGCAATCTCTCTCTACTTCTCTTGTTCATCTCAAATAAAGGTAAGCTTAATATGCGATTTAAACG…
	>rna-XR_002664209.1 gene-LOC111215065 name=LOC111215065 seq_id=NC_027760.2 type=exon
	CTCCTCTTATCTTCTCATCAgatctttgtttctttcttcttcttctttttttttgcttttttggttatgtttttCTCGATTTAGACAAAAACCCTAGACTTGATTTTCCAAAAGATCTCTGGAGATGGAAGAACTGCGAGTGAATGAGTTgggacaaaagaaaaacatagcaACTGACAGAAGAGAGTGAGCACACAAAAGTAATCTGCATATACTGCATTTGCTTCTCTTGCGTGCTCACTGCTCTTTCTGTCAGATTCTAGTGCTGATCTCTTTGGCCTGTCCTTGTTCTCTTTgtctcaatctctctctctctctctcacatacGCAATCTCTCTCTACTTCTCTTGTTCATCTCAAATAAAGGTAAGCTTAATATGCGATTTAAACGATGGCTTG…
	>rna-XR_002664210.1 gene-LOC111215065 name=LOC111215065 seq_id=NC_027760.2 type=exon
	AGTATCTCTTTCCTCTATTcatgtttgtgtgttttctcTCTATGGTTCCTTGTCTACTTTAATCTCTGGAGATGGAAGAACTGCGAGTGAATGAGTTgggacaaaagaaaaacatagcaACTGACAGAAGAGAGTGAGCACACAAAAGTAATCTGCATATACTGCATTTGCTTCTCTTGCGTGCTCACTGCTCTTTCTGTCAGATTCTAGTGCTGATCTCTTTGGCCTGTCCTTGTTCTCTTTgtctcaatctctctctctctctctcacatacGCAATCTCTCTCTACTTCTCTTGTTCATCTCAAATAAAGGTAAGCTTAATATGCGATTTAAACGATGGCTTGTTCCTTGTATAGATCTGATTGCATGCGAGGTGATAGCTTTAAACTTTCACCAT…
	>rna-XR_002664297.1 gene-LOC111215201 name=LOC111215201 seq_id=NC_027760.2 type=exon
	ttgctagAACAAGTAATAACATAGTAAATGAGAATCCAGTGACATGTCTCAAAAAGTAAATCCAATGTTTTTACTGCGATATCTTGAAATTTGAAAGAGAGAGGGACAGAGAGTGTGGGGACCAGAGACACCCATGTTTCTTGTCTTGTTTATCTTTGGTTCTCCACTAAATTTCTTCATAAAAAGCcctttttatttcttgattCTCTCTTCTATCATCACCACTCacttatcttcttctccatctcgtctctctctctctctgtttctctcttgATCTTAGCCGGGTCTTGTGGGAGGAGCAAACCGACAGAGAGATAATTTTAGATCATTATAAACCATACAATGATTCTTCGAGGGAAGGGGCTTTCTCTTTTGAGGGGAATGTTGTTTGGCTCG…
	>rna-XR_002653174.1 gene-LOC111199259 name=LOC111199259 seq_id=NC_027763.2 type=exon
	ctctctctctcttctctctctatctctctgctTTAGATCTCAGTCTCATCAGGTCTTATCTGCTTAGTAACTGGCTTCCACGATCTGGTTACATGTATATATGTCATTCCCTTTTTgcaaatcaaaattttgtatgGTTTAATCTTATTTTGCTGTTTTGGCTGTATATATCAGAGGGTGTTTTTTACATCCCCCTCTCTCATCTCTATCGCTTAGGGTTTCGCTTCTTCtgtgttttagttttgttttgttccaaTTAAGTAGAAGAGAGTAAAATTCCGTAATTTTTTTACTTCTCATCTAATCATACCAAGCCATTTCGAATAGTTCGTCAAGTTTCTCCtctcatatgtatatatatatatatgtattgtatATGCATAACTATGTATTTTGTAC…
	>rna-XR_002653184.1 gene-LOC111199262 name=LOC111199262 seq_id=NC_027763.2 type=exon
	GAACATGTCCATCATTTATATCAATGGCCTTGGAGAAAAACAACATTGCTCCcacttagagagagaaaaagagttcTTCACAGCAACTAGAGAAAGGATCCAAAGGGATCGCATTGATCCTAATCAAGCTGAGTTATTCccgaataattattttaattttttctcaatggaaagatagaaaaaaaaaattttgcttCGTTTTCCGGATCATGCGATCTCTTCGGATTCATCCTCTGGTAGCTTCCACCTTGGTCAAAGGGTTTCTACAAAGTTTCGAGGATTTAGGACACATGTCAAGAAAACAAGAATATGAGTTTAATACAACGTGGAACAGACACTAACTAAAGAATTTTGAagggagaagagagaaggaaaaACAATACTAATGATTATGTTAGC…
	>rna-XR_002663545.1 gene-LOC106438439 name=LOC106438439 seq_id=NC_027759.2 type=exon
	aacattttgtCACAAGTATAAAGcatacattatataatttatttatttattttatatacacacacacttCTCTTGTATATTCACACAAAGATGTATGCTTTCTCTTtgtctctcctctctcctctctctccatctctctgtTTTAGATCTCATCAGGTCTTCTCTGCTTAGTATGTGGCTTATCTGGTAACATGTATTATATAcgtcatacttttttttttgcaaatcaaaatttgtgttgttttgtttcattttactGTTTTAGCTGTATAAAATACCAAGTTCAGACTTCAGAGTGTATTCAAGATTTTTcattctcctctctctcttagGGTTTcgcttcttctgtttttttttctttttttggtctgGTTCCAATTAAGTAGAAGAGAGTAAAAT…
	>rna-XR_002664046.1 gene-LOC111214693 name=LOC111214693 seq_id=NC_027759.2 type=exon
	TCCTCTTACACCTATCTGCAAAAATCCTTAAAGAACAATCGCCATTTTTTCTCTGATTTCATTTCTCTCCTAATCCCAAATGAACTACGAACACATCTTTATTCTTTACCTACGTATAAGCCATCCAACATTCATTTATGGAAATCTTTTTtctacaatatattatatatgtgtgtgtgctCTTATGGTCGTGCCTGGCTCCCTGTATGCCACAAGTATATACCGATCTCGTTACGAAATCTGTGGCTAGTGGCGTACAGAGTAGTCAAGCATGACCAAAGCTTTTCTTGGTGTATAAGTAGTATTTTGTCTTTATAACAACATATAGCATGTATGGTGTTTTATATGCATTTTATTATACGCATGGATTATGTTTTATTGTACACatcttcattattt…
	>rna-XR_002661141.1 gene-LOC111209711 name=LOC111209711 seq_id=NC_027775.2 type=exon
	TCAAGTATGAAGATCTTTGGAGTCTTGTGCGTTGCGTCTTTTAGCTCATGAAACGGAACtctatatatcaattaaaatgtTCTGTCCCCTTTGCATGTAagagagataaagaaaccgACAAAAGCCATAAAGAAAGGGGACTCTCTGAATGAGCAAGAGATAAGGCTCCTCTTATCTTCTCATCAgatctttgtttctttgtttcttctttttttttttgcttttttggttatgttttttCTCGATTTAGACAAAAACCCTAGACTTGATTTTCCAAAAGGTGTCTTAAATAGTATCTCTTTCCTCTATTCATATGTGTGTATTTTCTCTCTATGGTTCCTTGTCTACTTTAATCTCTGGAGATGGAAGAACTGCGAGTGAATGAGTTgggacaaaaga…
	>rna-XR_002661140.1 gene-LOC111209711 name=LOC111209711 seq_id=NC_027775.2 type=exon
	TCAAGTATGAAGATCTTTGGAGTCTTGTGCGTTGCGTCTTTTAGCTCATGAAACGGAACtctatatatcaattaaaatgtTCTGTCCCCTTTGCATGTAagagagataaagaaaccgACAAAAGCCATAAAGAAAGGGGACTCTCTGAATGAGCAAGAGATAAGGCTCCTCTTATCTTCTCATCAgatctttgtttctttgtttcttctttttttttttgcttttttggttatgttttttCTCGATTTAGACAAAAACCCTAGACTTGATTTTCCAAAAGGTGTCTTAAATAGTATCTCTTTCCTCTATTCATATATCTCTGGAGATGGAAGAACTGCGAGTGAATGAGTTgggacaaaagaaaaacatagcaACTGACAGAAGAGAGTGAGCACACAA…
	>rna-XR_002661139.1 gene-LOC111209711 name=LOC111209711 seq_id=NC_027775.2 type=exon
	TCAAGTATGAAGATCTTTGGAGTCTTGTGCGTTGCGTCTTTTAGCTCATGAAACGGAACtctatatatcaattaaaatgtTCTGTCCCCTTTGCATGTAagagagataaagaaaccgACAAAAGCCATAAAGAAAGGGGACTCTCTGAATGAGCAAGAGATAAGGCTCCTCTTATCTTCTCATCAgatctttgtttctttgtttcttctttttttttttgcttttttggttatgttttttCTCGATTTAGACAAAAACCCTAGACTTGATTTTCCAAAAGATCTCTGGAGATGGAAGAACTGCGAGTGAATGAGTTgggacaaaagaaaaacatagcaACTGACAGAAGAGAGTGAGCACACAAAGGTAATTTGCATATACTGCATTTACTTCTCTTGC…
	>rna-XR_002661288.1 gene-LOC111209882 name=LOC111209882 seq_id=NC_027775.2 type=exon
	CAAAGCCTGGCCATTGATTAAGACACGTTTCTCTTTCCGACGAACCATAACCAAGCGTTTCTCATCCGTACTCACTTTTCtctcctccctctctctctctgtttctcacCTTCTTTTCTGCTTCCAAAGAATCTAGCTTCAGTCCTAGGGTTTTACGATTCTCTATTTAACTTCCCTCTTCTTTCGATAGCGAGCAAACCGAGCCGACACATATACATTCTTTGCATGCAAGAGAGTGATAATACATATAAGATTAAAGGAAATAAACTCATCTGTTATCCGTTCCAGATTCAACCCTGAATGTATCTCCATCACCGATTTTTCTAgatccagtttttttttttctagattcAGTTCTTTCTAGACTAGGTtcttttgaaaccctaatttacaTTATTG…
	>rna-XR_001272553.2 gene-LOC106359524 name=LOC106359524 seq_id=NC_027764.2 type=exon
	aaaactaaacatgTTTTGCAAGTGAATGGGAAAGAGATATCCTTAGGGACGAGAATCTAGCCAGCCTTGAGCATTTGCAAGTTTATGCGCTCGTAGACAAGCTTAATACACTACATGGAAGCATACGTTTGATTTCCGACCAATGGATCTATCCAAATTGTCCATCAACCACGTTTACGACCCATTTCTCCACCTCAACCAACACCAACGGAACATTTTGAACCGAGCTCAATGGTTGCAAACTTACATATTATGCCTTTGGAGTTGGTTATAAACTTTAGTCATTTGAATGTTGGGCTTCTGATAAATGGGTTTAACCCATGTTTCTAAATATTTGTGCACACTATATTTCGGGCCGTAGAGATGTCTCTCCCGTTGGCATTCAGCTAGGGTTTCTAA…
	>rna-XR_001284807.2 gene-LOC106424115 name=LOC106424115 seq_id=NC_027764.2 type=exon
	tctctctctctctctcccctttaTATACCGACTGTGTCGCCATTGGCAGAAAGCAATGCTCATCAAACAGCTAGATCTCTGAGAATTAAAATACGATCGAATTGAGGATTTTCTCTTGTGTTCACTAGGGTTTGGAGAGATCTGTGAGAACGGGGAGTGAGGATGAGAGATTTTGAGTCTTTTTGCACAGAAAATCTATGtgggttttatttaattataagttGCTAGAAGACAGAGAAGAAATGCAACAGAGAAAACTGACAGAAGAGAGTGAGCACTTGCAAGGCACTGTTATGTGTCAATAACTTTGCGTGTGCGTGCTCACCTCTCTTTCTGTCAGTTGCCTGACTTctcgctttctctctctcttctctcaacTTTGTTGGCCTTTTTATCATC…
	>rna-XR_001272725.2 gene-LOC106360231 name=LOC106360231 seq_id=NC_027764.2 type=exon
	AGTCCCATAGACTTTGTAAAATAGccaaactcttcttcttttctcccTTGATTCTTCTCCTTACTACTTTTGACGTTGCCTAAGAGTTTTGTAAGGATCCAGTGACCTTTCCCGGTAAAGTAAGTTTTTTGTGCCGACAATCAtttcttatataatttgatttgatgTATAGTTGATGCTACTCTTTTGTTCTCGATTTTCTGGAGCTGACTAGTGATAATCGGGTGAGACTGGTGTTGATGTAAAGGTAACGCGAGATATTAGTGCGGTTCAATCAAATAGTCGTACTCTTAGCTATTAGAGATCGGTTTTGTTCGATTGAGCCGTGCCAATATCACGCATAAAACCAACATGGCAAAGATGGTTATTACCCTTAAAAGTATATTGTCAGTCTTCTTT…
	>rna-XR_002657824.1 gene-LOC111205331 name=LOC111205331 seq_id=NC_027770.2 type=exon
	TTCACTTTCCTCTCAAGTCTCtttatcatttttcatttttagtaacaagaaaaaaagaaagtagaGAAGAATCTGTAAAGCTCAGGAGGGATAGCGCCATCATATATAATCTCATTCACATCGATATTTTTGGCGCTGTCCATCCTGAGTTTCATTGGCTCTCCTTACTGCAGTGAAAAAGGCTTTCACAGATACATCAACAACttcaaaaatcaatatcaatTTTGTTTAGAGTTTCACTTTAGCTCTTTTAATATCACCACCACCTTTTTCTTgctttcttcctttttctctttGATCAAAGAAAATTAGTCTCTTTCTCCGGTGAAGTCAGCCACCAACAGGTATTCGAGAAGTAAATAATGTCAAAGGATGGATAGGTCTTCTTCTGTATATTTT…
	>rna-XR_001279212.2 gene-LOC106395336 name=LOC106395336 seq_id=NC_027770.2 type=exon
	ttgtcttttttctttttcatatgtGCCAAGTAAAAAACCGGCTTAACGGTGAGTACCATGTTCTCTCTTCACGTACAATTCAATTCTATTTTCAGTCATTTGCcttctttgattcttttattttttatttttgatgttgAGTATGGGATAATAAGCAACGGATCGGCGAGAACGTATGAATATCTTACTAACGTAAAGACAATACGAGATATTGGTGCGGTTCAATCAGAAATCCACACTCTTTTGTTGTAGAGATCGGTTTGTTTGATTGAGCCGTGCCAATATCACGAGTGTAATTGGCCTCCACCATGCTAGCTGGTGTTCatcaagGTTCTGGAGTTCGGATAACACAAGAATGAGCGTAATCCTTGAATATAGACATCGATATACCTAATCTGC…
	>rna-XR_002657946.1 gene-LOC111205394 name=LOC111205394 seq_id=NC_027770.2 type=exon
	AtttcttcattctctcttctaTCATCACCACTCacttatcttcttctccatctcgtctctctctctctgtttctctctaGATCTTAGCCGGGTCTTGTGGGAGGAGAAAACCGATAGAGAGATAATTTTAGATCATTACAAACCATACAAGGATTCTTCGATGGGAAGGGGCTTTCTCTTTTGAGGGGAATGTTGTTTGGCTCGAAGACTCTAGCTATTCATGTTAGATCTTCTTCGATCTAATCGAATCACACCTCCATGTTTGAGATCtgattaggattttagggtCGTCGGACCAGGCTTCATTCCCCCCAATTATTGCTCCCTGCTTACTCTCCAACGTaccttttttcttaatttagggtttcagatcTTGTGGTTGAACCCTTGTTAAAGATA…
	>rna-XR_002652944.1 gene-LOC111198823 name=LOC111198823 seq_id=NC_027762.2 type=exon
	ATAACTTCCTCTCCTTCACTTTGCAGTCCCACAATCTTTCAAATAGCCACGTTCCTTTTTTTCTCCGTTGATGCTACTTTTGTCTTTGACGTTGCTGAAAGTAAGAGTTCTGCAAGGATCCGATGATGTTCACCGGTAACGCGAGATATTAGTGCGGTTCAATCAAATAGTCGTGTTCTCACTTGATAGAGATCGGTTTTGTTCGATTGAGCCGTGCCAATATCACGCGTCAACCCAAAACGGTAAAGATGGTTTTATTAACCGTGAAGGTATGTTGACACGCGACACAAACCCCAAAATCCAAGTACAACTGCGATATAACActtctatttttagaaagtaaataagaaattttaagcaaaaagaaaaatatgtagtAATAGCTAGAATGAAAATGTT…
	>rna-XR_002652935.1 gene-LOC111198781 name=LOC111198781 seq_id=NC_027762.2 type=exon
	AACAAAACTTTGCCAGATATGGTAactgttctctctctctctatctctccttcttctttctatcttttcaattgagagagagagaagagaaggtccGAGGAGGAGGACTAAAAAGATGTTACGGCGGCCTCTGACTCGCTTGGTGCAGGTCGGGAACTGATTGGCTGACACCGCCACGTGGCTTTCCATGGTTGGCTTGTGAGCAGGGATCGGATCCCGCCTTGTATCAAGTGAATCCGAGTCCgacgtgaaaaaaaaaaaaaagtccacaGCTTTCAGATCTGACACACTCATCAAATATCTTGTAATTGGGGATTTATTCTTCTTTGTTAatcttttatttagttttgacGCATGATGATTAATGGCTATGCTCTTAAAATTTCAGGATCTAAGGTG…
	>rna-XR_001280160.2 gene-LOC106399790 name=LOC106399790 seq_id=NC_027771.2 type=exon
	AATCTTTCAAATAGCCACGTTCCTTTTTTTCACCGTTGATGCTACTTTTGTCTTTGACGTTGCTGAAAGTAAGAATTCTGCAAGGATCCGATGATGTTCACCGGTAACGCGAGATATTAGTGCGGTTCAATCAAATAGTCGTGTTCTCACTTGATAGAGATCGGTTTTGTTCGATTGAGCCGTGCCAATATCACGCGTCAACCCAAAACGGCAAAGATGGTTTTATTAACCGTGAAGGTATGTTGACACGCGACACGCGACACAAACCCCAAAATCCAAGTACAGCTGCGATATAACActtctatttttagaaagtaaataaggaattttaagcaaaaaaaaaaaagtagtgaCATGCTACGAGTGTAAAAGTAATAGCTAGAATGAAAATGTTGTCGT…
	>rna-XR_002658380.1 gene-LOC111206228 name=LOC111206228 seq_id=NC_027771.2 type=exon
	TTTTTGTGCCGACAATCAtttcttatataatttgatttgatgTATAGTTGATGCTACTCTTTTGTTCTCGATTTTCTGGAGCTGACTAGTGATAATCGGGTGAGACTGGTGTTGATGTAAAGGTAACGCGAGATATTAGTGCGGTTCAATCAAATAGTCGTACTCTTAGCTATTAGAGATCGGTTTTGTTCGATTGAGCCGTGCCAATATCACGCATAAAACCAACATGGCAAAGATGGTTATTAACTTATAAAGTATATTGTCAGTCTTCTTTAAGCTTCCAAGGTAGATGATGTTAACAAGtaacacaaaccacaaaatcCAAGTACAAGGGCGAAAACActtctatttttagaaagtatcAAAGGAATTTCAAGCAAAGAATATGTAGTAACATGC…
	>rna-XR_002655830.1 gene-LOC106375391 name=LOC106375391 seq_id=NC_027768.2 type=exon
	CCATATTGAGTGAGTGTTTTGGGACAAGTTTTAGAGAAACGCAAAGAAACTGACAGAAGAGAGTGAGCACACAAAGGCACTTTGCATGTTCGATGCATTTGCTTCTCTTGCGTGCTCACTGCTCTATCTGTCAGGTTCCGGCACCGATTCTTTTTGGTCCGTTCACGTTTTCTTCTTTGATTGTGTTCCCATCTCTCTCATAGTCTCACCCACTTTCTTTCTCCATAGGTTTTGATTGTCTATGCCAGAGATGAACGCAGTGTTTACGGTAACCTATTAACTTGTACTTGGGAtgttgatttagggtttttgtgTCATGTTTTATCAGTTGATTGCCGCAGGTTtcacatatgtatatatgaatgaTCTAGTTTAGAGTCAGGATATTAAACAATGTTT…
	>rna-XR_001275257.2 gene-LOC106375391 name=LOC106375391 seq_id=NC_027768.2 type=exon
	CCATATTGAGTGAGTGTTTTGGGACAAGTTTTAGAGAAACGCAAAGAAACTGACAGAAGAGAGTGAGCACACAAAGGCACTTTGCATGTTCGATGCATTTGCTTCTCTTGCGTGCTCACTGCTCTATCTGTCAGGTTCCGGCACCGATTCTTTTTGGTCCGTTCACGTTTTCTTCTTTGATTGTGTTCCCATCTCTCTCATAGTCTCACCCACTTTCTTTCTCCATAGGTTTTGATTGTCTATGCCAGAGATGAACGCAGTGTTTACGAAAACATGGAGGAGTCGAGCGAGAGGGTTGTTCGGTTAGAGCAACACGATGAGATCACGATGGGCGATGACTTGATTATCCATTCCATCCCACAGGACCTAGCACTAGCAGTATCGGCGATATATGATCTC…
	>rna-XR_002656669.1 gene-LOC111204292 name=LOC111204292 seq_id=NC_027769.2 type=exon
	ACGAAGAACATTATTGCTGgtttaaaagagagaaaaatatctTCGAGGGTAGAGGACCTCGACAGGGTGGACATGAGAACACATGTGTATTCAAAGGCTGTAATGACGCCACGTCACTGTAACGTACATCTCTCTTTTCATGTGTTCTCAGGTCACCCCTGCTGAGCTCTTTCTCTACCATCCATCTTTATCAATGCTCGGTGGCTTCACTCATTCACCAAATGGGACAAATAATTCTGGAGTACGTAGTTTCTATCTGCAGTGTGGTTACAAGTTAAATGGgacaaagaagatgaaactCACGTTACGCACCTACCTTAACTTCACAAGTCATCAACACACCTTTACCAAATCATACCATCCACAAATCCCCCCACccaaaaaagagaaacaaaatgg…
	>rna-XR_001278178.2 gene-LOC106390022 name=LOC106390022 seq_id=NC_027769.2 type=exon
	AATACATAAAAAGGGTGGCTTATATGAACAACAGaattaaatgtttaattcaTCAAATTAATAGAAAGGGAAAAAGTAGTCACACACAACACATATGGCCTTTTCGCCGGCTGTGTTACACACGCGCCACCTTTGAAAAGCCGGTTTACAGACCAGGTGTGCTCTTCTACCCAGTCACTATAAAACACGTGTTTGAAACTCTGTAGAACTCTTAGCAACGAGCCAAGGATTGGacaattcaaaacaaaacaaaagaaagaagatctctctctctctctctcccccctTTATATACGGACTATGTCGCCATTGGCAGAAAGCAATACTCATCAAACAGCTAGATCTCTGTGTTCACTAGGGTTTGGAGAGATCTGTGAGAACGGGGAGTGAGGATGAGAG…
	>rna-XR_001271588.2 gene-LOC106352368 name=LOC106352368 seq_id=NC_027765.2 type=exon
	ATGCTCGATTACGATTACAAGTTGAGACACTTGTCGtctcttttctttccttttaatGTTTTGCTCTCTCCTCCCCCTCAAAACCCAACTTCtgataactaaaattttcattGGATAGCAATTCATATTCTCTGTATCTTCCgtaattaattaataagtttCGAGTATATAGCTAGGGTTGATGTGAGATTTGTATATCTAGATGGATCTATTTCTATGTTGGTTTTGGGAGGCTGAAGCTGCCAGCATGATCTGGTAATCGCTACATACgacatatatacatacacatgcTAATTTAATTTACTTCCACATATATCAATGTatctctcaaataatatataatcttttttttttttgctaacattTGGATCATATATAATCTTAGTgttaaaaatgtgt…
	>rna-XR_001274070.2 gene-LOC106368582 name=LOC106368582 seq_id=NC_027765.2 type=exon
	ACCATTTTACCTCATAAGatgaaactctataaattaaaatgttctGTTCAATTCAATGCCTCGGCAGACATCTGTTCCCTTTGCATGTAAGAGAGATAAAGAAAGCGACAAAAGCCATAAAGAAAGATCTCTAGAGTTGGATGAATTGTGAGTGAATGAGCTGGGGCAAAAGAAACACACAGAAACTGACAGAAGAGAGTGAGCACACAAAAGTAAATTGCATATGTTGCATTTGCTTCTCTTGCGTGCTCACTGCTCTTTCTGTCAGATTCCCGTGCTGATCTCTTTGGCCTGTCCTTGTTCCTCTTTGtctcagtctctctctctctcacatacacaagctctctctctctctcttgattaTTTCCAAACTAAGGTAAGAATATACCACTGAAATGA…
	>rna-XR_002659848.1 gene-LOC106407493 name=LOC106407493 seq_id=NC_027773.2 type=exon
	TGTTAAGCATAATGGCCGACGAACAAGAATGATTGTTTGAACTCTTAACAACATACACACAAAAGGGTGGCTTATAGATGAGGTCTGACAGAAGAATTCACTGGACAAGATAAGTCGCAGACATATGAGTCCTATTTCGCCCGATGTGTTACACACGCGCCACCTCTGGAAAAGCTGGTTTAAAttgaactgttttttttttttgtaaaactaaatTGAACTGTTTATTTGACTGACCAGGTGTGCTCTTCTATCCACACAATAGAACACGTGTCTGAAACCctgttaaaagttaaaaactctCTTAACTGAGATTGGACCCTAAAAAAgacaattaaaagaaaagtgaaaaaaaCCACAATCTCCGCTATCTTCAaatcctttctctctctttatata…
Severe infection level	>rna-XR_001273710.2 gene-LOC106366705 name=LOC106366705 seq_id=NW_019168592.1 type=exon
	GTGTGGGTGTGAAGATGTTCGATTACGATTACAAGTTGAGACACCTGTCGTCTCTTTTCTTTCCTTGTAATGTTTTggtctctcctcctcctcaaaaccCAACTTCtgataactaaaattttcattGGATAGCAATTCATTTCTCTGTATTTCCgtaattaattaataagtttCGATTATATAGCTAGGGTTGATGTGAGATTTGTATATCTAGATGGATCTATTTCTATGTTGGTTTTGAGAGGCTGAAGCTGCCAGCATGATCTGGTAATCGCTACATAcgacatatatacatatacatactAATTTAATTTACACATGTATCAATGTATCCAGGGCCGGCTGAGGCGCAGGTACAAGGGGGCGTGGACCCAgggtccaaattttttttttcataat…
	>rna-XR_001273707.2 gene-LOC106366705 name=LOC106366705 seq_id=NW_019168592.1 type=exon
	TGTGGGTGTGAAGATGTTCGATTACGATTACAAGTTGAGACACCTGTCGTCTCTTTTCTTTCCTTGTAATGTTTTggtctctcctcctcctcaaaaccCAACTTCtgataactaaaattttcattGGATAGCAATTCATTTCTCTGTATTTCCgtaattaattaataagtttCGATTATATAGCTAGGGTTGATGTGAGATTTGTATATCTAGATGGATCTATTTCTATGTTGGTTTTGAGAGGCTGAAGCTGCCAGCATGATCTGGTAATCGCTACATAcgacatatatacatatacatactAATTTAATTTACACATGTATCAATGTATCCAGGGCCGGCTGAGGCGCAGGTACAAGGGGGCGTGGACCCAgggtccaaattttttttttcataatt…
	>rna-XR_001273708.2 gene-LOC106366705 name=LOC106366705 seq_id=NW_019168592.1 type=exon
	GTGGGTGTGAAGATGTTCGATTACGATTACAAGTTGAGACACCTGTCGTCTCTTTTCTTTCCTTGTAATGTTTTggtctctcctcctcctcaaaaccCAACTTCtgataactaaaattttcattGGATAGCAATTCATTTCTCTGTATTTCCgtaattaattaataagtttCGATTATATAGCTAGGGTTGATGTGAGATTTGTATATCTAGATGGATCTATTTCTATGTTGGTTTTGAGAGGCTGAAGCTGCCAGCATGATCTGGTAATCGCTACATAcgacatatatacatatacatactAATTTAATTTACACATGTATCAATGTATCCAGGGCCGGCTGAGGCGCAGGTACAAGGGGGCGTGGACCCAgggtccaaattttttttttcataatta…
	>rna-XR_002658214.1 gene-LOC111205685 name=LOC111205685 seq_id=NC_027758.2 type=exon
	aagaaacattttatttttaaaggtaATTATATTGTTCcagttataaataaatttattcatatttgCCTTCAGATCCAACTTTCGTTCCCTCTTTCGAATTTTTTTAAGTACCAGCAAAGTTTGGTTAATTCTTTCCCCCTCTATATATTTGTACCTCCACTCCTCTTACATCTCCACAAATCCTTGACAAAGAATAATTCTTCGGTTTCATTTTCCTCCCATCCAAATAAAATTACATACATATGTTTATTATGTTCCCTTTAAAACCGACGCATAAGCCATCCAACATTCATATTTAGAAGTCTTGTATACGTAACGTATGGAATAATAGTCGTGCCTGGCTCCCTGTATACCACAAGCAAACACCGATCTCATTATGAAATCGATCGCTAGTGGTGT…
	>rna-XR_002660319.1 gene-LOC111208321 name=LOC111208321 seq_id=NC_027757.2 type=exon
	CCATTTATACACACGTCTCCAGAAATCCTTGACAAAGAATAACTCCATTTTTTCTCTGGTTCCATTTCTCCCACCCAAATGAAACTacagaaacatttttttttctattggaATCAAGACCGAACGACTATATAAGCCATCCATGATTCATATTTGGAAGTCTGGTATACACCACACATATATATGATACGAAGTCATGCCTGGCTCCCTGTATGCCACAAGTAAATACCGATCTCATTATGAAATCGGACACTAGTGGCGTACAGAGTAGTCAAGCATAACCACTGATATTCTTGATATATGAGTACTTTGTTTTTGTAACACAAGATATATATGTGTGGATGGTGGCTAGCTATAAGATATATGTTATATGCATGGATTATGTCTAGAACTGTTATA…
	>rna-XR_002660886.1 gene-LOC111209134 name=LOC111209134 seq_id=NC_027774.2 type=exon
	TTGGTTAATTCTTTCCCCCTCTATATATTTGTACCTCCACTCGTCTTACATCTCCACAAATCCTTGACAAAGAATAATTCTTCGGTTTCATTTTCCTCCCCATCCAAATAAAATTACATACACATGTTTATTATGTTCCCTTTACAACCGACGCATAAGCCATCCAACATTCATATTTAGAAGTcttgtatacatatatactacGTATGGAATAATAGTCGTGCCTGGCTCCCTGTATACCACAAGAAAACACCGATCTCATTATGAAATCGATCGCTAGTGGTGTATAGAGTAGTCAAGCATGACCAAAGCTTTTCTTGATATATAAGTACTTTGTCTTTGTAACGCATAATGTCTATAAAATTTCTGGTATATGTATGCATGaattatgtttagaaa…
	>rna-XR_001278112.2 gene-LOC106389769 name=LOC106389769 seq_id=NC_027774.2 type=exon
	CCTCATAAGatgaaactctataaattaaaatgttctGTTCAATTCAATGCCTCGCCAGACATCTGTTCCCTTTGCATGTAAGAGAGATAAAGAAAGCGACAAAAGCCATAAAGAAAGATAAGACTCTTTGAATGATAGAGAGATAAGGCTCCTCTTATCTTCTCAACAgatctttgtttctttcttcttttcttttcgttttttccttttttggttATGTTTGTTCTCGATTTAGACAAAAAAACCCTAGACTTGATCTTCCAAAGGGTGTCTGAATTTCTTCCCTTTGTACAGATTTGTATTCTTTCTCTTTGTGGTTCTTTGCCTTCTTTAGTTAAAACTTAGATCTAACCATTAATCTCTTATCTTTTCACTGACCCAATGACTCTTATTCTTCGT…
	>rna-XR_001282809.2 gene-LOC106414208 name=LOC106414208 seq_id=NC_027774.2 type=exon
	TTGCAGTCTCATAGACTTTGCAAATAGCCACCTTCTTTtctctcctctgtttcttctacTTAGTACTTTTTGTTTTGGACGTTGCTGAAAATAAGAGTTCTGCGCGGATCCGATGATCTTCACCGCTAGTGATGAAAATCGGATGAGACGGGTTTTGGTTGTGATGTAAGCTGGTCAAGCGAGATATTAGTGCGGTTCAATCAAATAGTCGCACTCTTAGTAGATAGAGATTGATTTTGTTCGATTGAGCCGTGCCAATATCACGCATATAACCAAGATGGTTATTAACCTCAAAAGTATATTGTCAATCATCTTAAAGAGTGATAGAGCTCAAGGTACTCAAGTGCAGGACGATTCCATGACCAGCCTTGCTTCATCAGTGATTTAAACCACTCTCTA…
	>rna-XR_002664208.1 gene-LOC111215065 name=LOC111215065 seq_id=NC_027760.2 type=exon
	CTTTGGAGTCTTGTGCGTTGCGTCTTTTAGCTCATGAAACGAAACtctatatatcaattaaaatgtTCTGTCCCCTTTGCATGTAAGAGAGATAAACAAACCGACAAAAGCCATAAAGAAAGATCTCTGGAGATGGAAGAACTGCGAGTGAATGAGTTgggacaaaagaaaaacatagcaACTGACAGAAGAGAGTGAGCACACAAAAGTAATCTGCATATACTGCATTTGCTTCTCTTGCGTGCTCACTGCTCTTTCTGTCAGATTCTAGTGCTGATCTCTTTGGCCTGTCCTTGTTCTCTTTgtctcaatctctctctctctctctcacatacGCAATCTCTCTCTACTTCTCTTGTTCATCTCAAATAAAGGTAAGCTTAATATGCGATTTAAACG…
	>rna-XR_002664209.1 gene-LOC111215065 name=LOC111215065 seq_id=NC_027760.2 type=exon
	CTCCTCTTATCTTCTCATCAgatctttgtttctttcttcttcttctttttttttgcttttttggttatgtttttCTCGATTTAGACAAAAACCCTAGACTTGATTTTCCAAAAGATCTCTGGAGATGGAAGAACTGCGAGTGAATGAGTTgggacaaaagaaaaacatagcaACTGACAGAAGAGAGTGAGCACACAAAAGTAATCTGCATATACTGCATTTGCTTCTCTTGCGTGCTCACTGCTCTTTCTGTCAGATTCTAGTGCTGATCTCTTTGGCCTGTCCTTGTTCTCTTTgtctcaatctctctctctctctctcacatacGCAATCTCTCTCTACTTCTCTTGTTCATCTCAAATAAAGGTAAGCTTAATATGCGATTTAAACGATGGCTTG…
	>rna-XR_002664210.1 gene-LOC111215065 name=LOC111215065 seq_id=NC_027760.2 type=exon
	AGTATCTCTTTCCTCTATTcatgtttgtgtgttttctcTCTATGGTTCCTTGTCTACTTTAATCTCTGGAGATGGAAGAACTGCGAGTGAATGAGTTgggacaaaagaaaaacatagcaACTGACAGAAGAGAGTGAGCACACAAAAGTAATCTGCATATACTGCATTTGCTTCTCTTGCGTGCTCACTGCTCTTTCTGTCAGATTCTAGTGCTGATCTCTTTGGCCTGTCCTTGTTCTCTTTgtctcaatctctctctctctctctcacatacGCAATCTCTCTCTACTTCTCTTGTTCATCTCAAATAAAGGTAAGCTTAATATGCGATTTAAACGATGGCTTGTTCCTTGTATAGATCTGATTGCATGCGAGGTGATAGCTTTAAACTTTCACCAT…
	>rna-XR_002664297.1 gene-LOC111215201 name=LOC111215201 seq_id=NC_027760.2 type=exon
	ttgctagAACAAGTAATAACATAGTAAATGAGAATCCAGTGACATGTCTCAAAAAGTAAATCCAATGTTTTTACTGCGATATCTTGAAATTTGAAAGAGAGAGGGACAGAGAGTGTGGGGACCAGAGACACCCATGTTTCTTGTCTTGTTTATCTTTGGTTCTCCACTAAATTTCTTCATAAAAAGCcctttttatttcttgattCTCTCTTCTATCATCACCACTCacttatcttcttctccatctcgtctctctctctctctgtttctctcttgATCTTAGCCGGGTCTTGTGGGAGGAGCAAACCGACAGAGAGATAATTTTAGATCATTATAAACCATACAATGATTCTTCGAGGGAAGGGGCTTTCTCTTTTGAGGGGAATGTTGTTTGGCTCG…
	>rna-XR_002664046.1 gene-LOC111214693 name=LOC111214693 seq_id=NC_027759.2 type=exon
	TCCTCTTACACCTATCTGCAAAAATCCTTAAAGAACAATCGCCATTTTTTCTCTGATTTCATTTCTCTCCTAATCCCAAATGAACTACGAACACATCTTTATTCTTTACCTACGTATAAGCCATCCAACATTCATTTATGGAAATCTTTTTtctacaatatattatatatgtgtgtgtgctCTTATGGTCGTGCCTGGCTCCCTGTATGCCACAAGTATATACCGATCTCGTTACGAAATCTGTGGCTAGTGGCGTACAGAGTAGTCAAGCATGACCAAAGCTTTTCTTGGTGTATAAGTAGTATTTTGTCTTTATAACAACATATAGCATGTATGGTGTTTTATATGCATTTTATTATACGCATGGATTATGTTTTATTGTACACatcttcattattt…
	>rna-XR_002661141.1 gene-LOC111209711 name=LOC111209711 seq_id=NC_027775.2 type=exon
	TCAAGTATGAAGATCTTTGGAGTCTTGTGCGTTGCGTCTTTTAGCTCATGAAACGGAACtctatatatcaattaaaatgtTCTGTCCCCTTTGCATGTAagagagataaagaaaccgACAAAAGCCATAAAGAAAGGGGACTCTCTGAATGAGCAAGAGATAAGGCTCCTCTTATCTTCTCATCAgatctttgtttctttgtttcttctttttttttttgcttttttggttatgttttttCTCGATTTAGACAAAAACCCTAGACTTGATTTTCCAAAAGGTGTCTTAAATAGTATCTCTTTCCTCTATTCATATGTGTGTATTTTCTCTCTATGGTTCCTTGTCTACTTTAATCTCTGGAGATGGAAGAACTGCGAGTGAATGAGTTgggacaaaaga…
	>rna-XR_002661140.1 gene-LOC111209711 name=LOC111209711 seq_id=NC_027775.2 type=exon
	TCAAGTATGAAGATCTTTGGAGTCTTGTGCGTTGCGTCTTTTAGCTCATGAAACGGAACtctatatatcaattaaaatgtTCTGTCCCCTTTGCATGTAagagagataaagaaaccgACAAAAGCCATAAAGAAAGGGGACTCTCTGAATGAGCAAGAGATAAGGCTCCTCTTATCTTCTCATCAgatctttgtttctttgtttcttctttttttttttgcttttttggttatgttttttCTCGATTTAGACAAAAACCCTAGACTTGATTTTCCAAAAGGTGTCTTAAATAGTATCTCTTTCCTCTATTCATATATCTCTGGAGATGGAAGAACTGCGAGTGAATGAGTTgggacaaaagaaaaacatagcaACTGACAGAAGAGAGTGAGCACACAA…
	>rna-XR_002661139.1 gene-LOC111209711 name=LOC111209711 seq_id=NC_027775.2 type=exon
	TCAAGTATGAAGATCTTTGGAGTCTTGTGCGTTGCGTCTTTTAGCTCATGAAACGGAACtctatatatcaattaaaatgtTCTGTCCCCTTTGCATGTAagagagataaagaaaccgACAAAAGCCATAAAGAAAGGGGACTCTCTGAATGAGCAAGAGATAAGGCTCCTCTTATCTTCTCATCAgatctttgtttctttgtttcttctttttttttttgcttttttggttatgttttttCTCGATTTAGACAAAAACCCTAGACTTGATTTTCCAAAAGATCTCTGGAGATGGAAGAACTGCGAGTGAATGAGTTgggacaaaagaaaaacatagcaACTGACAGAAGAGAGTGAGCACACAAAGGTAATTTGCATATACTGCATTTACTTCTCTTGC…
	>rna-XR_002661288.1 gene-LOC111209882 name=LOC111209882 seq_id=NC_027775.2 type=exon
	CAAAGCCTGGCCATTGATTAAGACACGTTTCTCTTTCCGACGAACCATAACCAAGCGTTTCTCATCCGTACTCACTTTTCtctcctccctctctctctctgtttctcacCTTCTTTTCTGCTTCCAAAGAATCTAGCTTCAGTCCTAGGGTTTTACGATTCTCTATTTAACTTCCCTCTTCTTTCGATAGCGAGCAAACCGAGCCGACACATATACATTCTTTGCATGCAAGAGAGTGATAATACATATAAGATTAAAGGAAATAAACTCATCTGTTATCCGTTCCAGATTCAACCCTGAATGTATCTCCATCACCGATTTTTCTAgatccagtttttttttttctagattcAGTTCTTTCTAGACTAGGTtcttttgaaaccctaatttacaTTATTG…
	>rna-XR_001272553.2 gene-LOC106359524 name=LOC106359524 seq_id=NC_027764.2 type=exon
	aaaactaaacatgTTTTGCAAGTGAATGGGAAAGAGATATCCTTAGGGACGAGAATCTAGCCAGCCTTGAGCATTTGCAAGTTTATGCGCTCGTAGACAAGCTTAATACACTACATGGAAGCATACGTTTGATTTCCGACCAATGGATCTATCCAAATTGTCCATCAACCACGTTTACGACCCATTTCTCCACCTCAACCAACACCAACGGAACATTTTGAACCGAGCTCAATGGTTGCAAACTTACATATTATGCCTTTGGAGTTGGTTATAAACTTTAGTCATTTGAATGTTGGGCTTCTGATAAATGGGTTTAACCCATGTTTCTAAATATTTGTGCACACTATATTTCGGGCCGTAGAGATGTCTCTCCCGTTGGCATTCAGCTAGGGTTTCTAA…
	>rna-XR_001272725.2 gene-LOC106360231 name=LOC106360231 seq_id=NC_027764.2 type=exon
	AGTCCCATAGACTTTGTAAAATAGccaaactcttcttcttttctcccTTGATTCTTCTCCTTACTACTTTTGACGTTGCCTAAGAGTTTTGTAAGGATCCAGTGACCTTTCCCGGTAAAGTAAGTTTTTTGTGCCGACAATCAtttcttatataatttgatttgatgTATAGTTGATGCTACTCTTTTGTTCTCGATTTTCTGGAGCTGACTAGTGATAATCGGGTGAGACTGGTGTTGATGTAAAGGTAACGCGAGATATTAGTGCGGTTCAATCAAATAGTCGTACTCTTAGCTATTAGAGATCGGTTTTGTTCGATTGAGCCGTGCCAATATCACGCATAAAACCAACATGGCAAAGATGGTTATTACCCTTAAAAGTATATTGTCAGTCTTCTTT…
	>rna-XR_002657824.1 gene-LOC111205331 name=LOC111205331 seq_id=NC_027770.2 type=exon
	TTCACTTTCCTCTCAAGTCTCtttatcatttttcatttttagtaacaagaaaaaaagaaagtagaGAAGAATCTGTAAAGCTCAGGAGGGATAGCGCCATCATATATAATCTCATTCACATCGATATTTTTGGCGCTGTCCATCCTGAGTTTCATTGGCTCTCCTTACTGCAGTGAAAAAGGCTTTCACAGATACATCAACAACttcaaaaatcaatatcaatTTTGTTTAGAGTTTCACTTTAGCTCTTTTAATATCACCACCACCTTTTTCTTgctttcttcctttttctctttGATCAAAGAAAATTAGTCTCTTTCTCCGGTGAAGTCAGCCACCAACAGGTATTCGAGAAGTAAATAATGTCAAAGGATGGATAGGTCTTCTTCTGTATATTTT…
	>rna-XR_001279212.2 gene-LOC106395336 name=LOC106395336 seq_id=NC_027770.2 type=exon
	ttgtcttttttctttttcatatgtGCCAAGTAAAAAACCGGCTTAACGGTGAGTACCATGTTCTCTCTTCACGTACAATTCAATTCTATTTTCAGTCATTTGCcttctttgattcttttattttttatttttgatgttgAGTATGGGATAATAAGCAACGGATCGGCGAGAACGTATGAATATCTTACTAACGTAAAGACAATACGAGATATTGGTGCGGTTCAATCAGAAATCCACACTCTTTTGTTGTAGAGATCGGTTTGTTTGATTGAGCCGTGCCAATATCACGAGTGTAATTGGCCTCCACCATGCTAGCTGGTGTTCatcaagGTTCTGGAGTTCGGATAACACAAGAATGAGCGTAATCCTTGAATATAGACATCGATATACCTAATCTGC…
	>rna-XR_002657946.1 gene-LOC111205394 name=LOC111205394 seq_id=NC_027770.2 type=exon
	AtttcttcattctctcttctaTCATCACCACTCacttatcttcttctccatctcgtctctctctctctgtttctctctaGATCTTAGCCGGGTCTTGTGGGAGGAGAAAACCGATAGAGAGATAATTTTAGATCATTACAAACCATACAAGGATTCTTCGATGGGAAGGGGCTTTCTCTTTTGAGGGGAATGTTGTTTGGCTCGAAGACTCTAGCTATTCATGTTAGATCTTCTTCGATCTAATCGAATCACACCTCCATGTTTGAGATCtgattaggattttagggtCGTCGGACCAGGCTTCATTCCCCCCAATTATTGCTCCCTGCTTACTCTCCAACGTaccttttttcttaatttagggtttcagatcTTGTGGTTGAACCCTTGTTAAAGATA…
	>rna-XR_002652944.1 gene-LOC111198823 name=LOC111198823 seq_id=NC_027762.2 type=exon
	ATAACTTCCTCTCCTTCACTTTGCAGTCCCACAATCTTTCAAATAGCCACGTTCCTTTTTTTCTCCGTTGATGCTACTTTTGTCTTTGACGTTGCTGAAAGTAAGAGTTCTGCAAGGATCCGATGATGTTCACCGGTAACGCGAGATATTAGTGCGGTTCAATCAAATAGTCGTGTTCTCACTTGATAGAGATCGGTTTTGTTCGATTGAGCCGTGCCAATATCACGCGTCAACCCAAAACGGTAAAGATGGTTTTATTAACCGTGAAGGTATGTTGACACGCGACACAAACCCCAAAATCCAAGTACAACTGCGATATAACActtctatttttagaaagtaaataagaaattttaagcaaaaagaaaaatatgtagtAATAGCTAGAATGAAAATGTT…
	>rna-XR_002652935.1 gene-LOC111198781 name=LOC111198781 seq_id=NC_027762.2 type=exon
	AACAAAACTTTGCCAGATATGGTAactgttctctctctctctatctctccttcttctttctatcttttcaattgagagagagagaagagaaggtccGAGGAGGAGGACTAAAAAGATGTTACGGCGGCCTCTGACTCGCTTGGTGCAGGTCGGGAACTGATTGGCTGACACCGCCACGTGGCTTTCCATGGTTGGCTTGTGAGCAGGGATCGGATCCCGCCTTGTATCAAGTGAATCCGAGTCCgacgtgaaaaaaaaaaaaaagtccacaGCTTTCAGATCTGACACACTCATCAAATATCTTGTAATTGGGGATTTATTCTTCTTTGTTAatcttttatttagttttgacGCATGATGATTAATGGCTATGCTCTTAAAATTTCAGGATCTAAGGTG…
	>rna-XR_002655401.1 gene-LOC111202409 name=LOC111202409 seq_id=NC_027767.2 type=exon
	AGAAGCAACAGAGGAACCTTATCtctttaattataattattttttgaatctcttgattctTCAATTCTATTTTATTACAACTGGTGTATAGTTATTTCGCattaatttttagggttttcgcattaaatgaaaagaaaagaatacatCTCAAGTCTTCTTCCTTTCGATTTCGTTATTTTATTTCCTCTCATCTCTCTTCACCATCTTCTATATAAATCGAGAGCGAGGAGTCTTCTagtattcataatatatataccaaacAAAACATATGTATACACCTCCTCAATTCCATCTTTATTGTTACATTTGAGAAGAAAACTACCAGAAATATATGGCATCACATATATATCTGGTGTGGTTTTCATATACACATGCGTGTATATAGGGGAAGGCGTATGT…
	>rna-XR_001280160.2 gene-LOC106399790 name=LOC106399790 seq_id=NC_027771.2 type=exon
	AATCTTTCAAATAGCCACGTTCCTTTTTTTCACCGTTGATGCTACTTTTGTCTTTGACGTTGCTGAAAGTAAGAATTCTGCAAGGATCCGATGATGTTCACCGGTAACGCGAGATATTAGTGCGGTTCAATCAAATAGTCGTGTTCTCACTTGATAGAGATCGGTTTTGTTCGATTGAGCCGTGCCAATATCACGCGTCAACCCAAAACGGCAAAGATGGTTTTATTAACCGTGAAGGTATGTTGACACGCGACACGCGACACAAACCCCAAAATCCAAGTACAGCTGCGATATAACActtctatttttagaaagtaaataaggaattttaagcaaaaaaaaaaaagtagtgaCATGCTACGAGTGTAAAAGTAATAGCTAGAATGAAAATGTTGTCGT…
	>rna-XR_002658380.1 gene-LOC111206228 name=LOC111206228 seq_id=NC_027771.2 type=exon
	TTTTTGTGCCGACAATCAtttcttatataatttgatttgatgTATAGTTGATGCTACTCTTTTGTTCTCGATTTTCTGGAGCTGACTAGTGATAATCGGGTGAGACTGGTGTTGATGTAAAGGTAACGCGAGATATTAGTGCGGTTCAATCAAATAGTCGTACTCTTAGCTATTAGAGATCGGTTTTGTTCGATTGAGCCGTGCCAATATCACGCATAAAACCAACATGGCAAAGATGGTTATTAACTTATAAAGTATATTGTCAGTCTTCTTTAAGCTTCCAAGGTAGATGATGTTAACAAGtaacacaaaccacaaaatcCAAGTACAAGGGCGAAAACActtctatttttagaaagtatcAAAGGAATTTCAAGCAAAGAATATGTAGTAACATGC…
	>rna-XR_002655830.1 gene-LOC106375391 name=LOC106375391 seq_id=NC_027768.2 type=exon
	CCATATTGAGTGAGTGTTTTGGGACAAGTTTTAGAGAAACGCAAAGAAACTGACAGAAGAGAGTGAGCACACAAAGGCACTTTGCATGTTCGATGCATTTGCTTCTCTTGCGTGCTCACTGCTCTATCTGTCAGGTTCCGGCACCGATTCTTTTTGGTCCGTTCACGTTTTCTTCTTTGATTGTGTTCCCATCTCTCTCATAGTCTCACCCACTTTCTTTCTCCATAGGTTTTGATTGTCTATGCCAGAGATGAACGCAGTGTTTACGGTAACCTATTAACTTGTACTTGGGAtgttgatttagggtttttgtgTCATGTTTTATCAGTTGATTGCCGCAGGTTtcacatatgtatatatgaatgaTCTAGTTTAGAGTCAGGATATTAAACAATGTTT…
	>rna-XR_001275257.2 gene-LOC106375391 name=LOC106375391 seq_id=NC_027768.2 type=exon
	CCATATTGAGTGAGTGTTTTGGGACAAGTTTTAGAGAAACGCAAAGAAACTGACAGAAGAGAGTGAGCACACAAAGGCACTTTGCATGTTCGATGCATTTGCTTCTCTTGCGTGCTCACTGCTCTATCTGTCAGGTTCCGGCACCGATTCTTTTTGGTCCGTTCACGTTTTCTTCTTTGATTGTGTTCCCATCTCTCTCATAGTCTCACCCACTTTCTTTCTCCATAGGTTTTGATTGTCTATGCCAGAGATGAACGCAGTGTTTACGAAAACATGGAGGAGTCGAGCGAGAGGGTTGTTCGGTTAGAGCAACACGATGAGATCACGATGGGCGATGACTTGATTATCCATTCCATCCCACAGGACCTAGCACTAGCAGTATCGGCGATATATGATCTC…
	>rna-XR_002656669.1 gene-LOC111204292 name=LOC111204292 seq_id=NC_027769.2 type=exon
	ACGAAGAACATTATTGCTGgtttaaaagagagaaaaatatctTCGAGGGTAGAGGACCTCGACAGGGTGGACATGAGAACACATGTGTATTCAAAGGCTGTAATGACGCCACGTCACTGTAACGTACATCTCTCTTTTCATGTGTTCTCAGGTCACCCCTGCTGAGCTCTTTCTCTACCATCCATCTTTATCAATGCTCGGTGGCTTCACTCATTCACCAAATGGGACAAATAATTCTGGAGTACGTAGTTTCTATCTGCAGTGTGGTTACAAGTTAAATGGgacaaagaagatgaaactCACGTTACGCACCTACCTTAACTTCACAAGTCATCAACACACCTTTACCAAATCATACCATCCACAAATCCCCCCACccaaaaaagagaaacaaaatgg…
	>rna-XR_001271588.2 gene-LOC106352368 name=LOC106352368 seq_id=NC_027765.2 type=exon
	ATGCTCGATTACGATTACAAGTTGAGACACTTGTCGtctcttttctttccttttaatGTTTTGCTCTCTCCTCCCCCTCAAAACCCAACTTCtgataactaaaattttcattGGATAGCAATTCATATTCTCTGTATCTTCCgtaattaattaataagtttCGAGTATATAGCTAGGGTTGATGTGAGATTTGTATATCTAGATGGATCTATTTCTATGTTGGTTTTGGGAGGCTGAAGCTGCCAGCATGATCTGGTAATCGCTACATACgacatatatacatacacatgcTAATTTAATTTACTTCCACATATATCAATGTatctctcaaataatatataatcttttttttttttgctaacattTGGATCATATATAATCTTAGTgttaaaaatgtgt…
	>rna-XR_002659848.1 gene-LOC106407493 name=LOC106407493 seq_id=NC_027773.2 type=exon
	TGTTAAGCATAATGGCCGACGAACAAGAATGATTGTTTGAACTCTTAACAACATACACACAAAAGGGTGGCTTATAGATGAGGTCTGACAGAAGAATTCACTGGACAAGATAAGTCGCAGACATATGAGTCCTATTTCGCCCGATGTGTTACACACGCGCCACCTCTGGAAAAGCTGGTTTAAAttgaactgttttttttttttgtaaaactaaatTGAACTGTTTATTTGACTGACCAGGTGTGCTCTTCTATCCACACAATAGAACACGTGTCTGAAACCctgttaaaagttaaaaactctCTTAACTGAGATTGGACCCTAAAAAAgacaattaaaagaaaagtgaaaaaaaCCACAATCTCCGCTATCTTCAaatcctttctctctctttatata…

## Sheet: Potential miPEP
Weak infection level	>rna-XR_001273710.2_1 [15 - 113] gene-LOC106366705 name=LOC106366705 seq_id=NW_019168592.1 type=exon
	MFDYDYKLRHLSSLFFPCNVLVSPPPQNPTSDN
	>rna-XR_001273710.2_2 [70 - 129] gene-LOC106366705 name=LOC106366705 seq_id=NW_019168592.1 type=exon
	MFWSLLLLKTQLLITKIFIG
	>rna-XR_001273710.2_3 [215 - 238] gene-LOC106366705 name=LOC106366705 seq_id=NW_019168592.1 type=exon
	MDLFLCWF
	>rna-XR_001273710.2_4 [229 - 246] gene-LOC106366705 name=LOC106366705 seq_id=NW_019168592.1 type=exon
	MLVLRG
	>rna-XR_001273710.2_5 [327 - 395] gene-LOC106366705 name=LOC106366705 seq_id=NW_019168592.1 type=exon
	MYPGPAEAQVQGGVDPGSKFFFS
	>rna-XR_001273710.2_6 [319 - 399] gene-LOC106366705 name=LOC106366705 seq_id=NW_019168592.1 type=exon
	MYQCIQGRLRRRYKGAWTQGPNFFFHN
	>rna-XR_001273710.2_7 [410 - 439] gene-LOC106366705 name=LOC106366705 seq_id=NW_019168592.1 type=exon
	MELDFQKKKI
	>rna-XR_001273710.2_8 [530 - 559] gene-LOC106366705 name=LOC106366705 seq_id=NW_019168592.1 type=exon
	MSWPWMYLSN
	>rna-XR_001273710.2_9 [582 - 629] gene-LOC106366705 name=LOC106366705 seq_id=NW_019168592.1 type=exon
	MCFLLFFMDACMYVCV
	>rna-XR_001273710.2_10 [611 - 637] gene-LOC106366705 name=LOC106366705 seq_id=NW_019168592.1 type=exon
	MHVCVCISV
	>rna-XR_001273710.2_11 [607 - 690] gene-LOC106366705 name=LOC106366705 seq_id=NW_019168592.1 type=exon
	MHACMCVYKCIDSGTRSSCGFIHSNHQQ
	>rna-XR_001273710.2_12 [690 - 794] gene-LOC106366705 name=LOC106366705 seq_id=NW_019168592.1 type=exon
	MNLSFLRKTIPAVDFYDFPLLSLEGYKYAGGRTCQ
	>rna-XR_001273710.2_13 [788 - 817] gene-LOC106366705 name=LOC106366705 seq_id=NW_019168592.1 type=exon
	MSIISPKKTF
	>rna-XR_001273710.2_14 [850 - 879] gene-LOC106366705 name=LOC106366705 seq_id=NW_019168592.1 type=exon
	MATSRIILNN
	>rna-XR_001273710.2_15 [990 - 1103] gene-LOC106366705 name=LOC106366705 seq_id=NW_019168592.1 type=exon
	MRYLLSTAMLVYQSIQLVNLKFVTKVNNLLSFFAVCIL
	>rna-XR_001273710.2_16 [1116 - 1145] gene-LOC106366705 name=LOC106366705 seq_id=NW_019168592.1 type=exon
	MKGYDQLIQF
	>rna-XR_001273710.2_17 [1126 - 1161] gene-LOC106366705 name=LOC106366705 seq_id=NW_019168592.1 type=exon
	MINSFSFDYNVY
	>rna-XR_001273710.2_18 [1236 - 1274] gene-LOC106366705 name=LOC106366705 seq_id=NW_019168592.1 type=exon
	MPARLWEEKTQKK
	>rna-XR_001273710.2_19 [1154 - 1339] gene-LOC106366705 name=LOC106366705 seq_id=NW_019168592.1 type=exon
	MYIKNFSAFQQKLTMEDQNKPFTTTRGHAGQIVGRKNSEKVRMRKKKGSLVTGTFQNQIF
	QK
	>rna-XR_001273710.2_20 [1393 - 1443] gene-LOC106366705 name=LOC106366705 seq_id=NW_019168592.1 type=exon
	MFQSLAKDGTIQVMKKS
	>rna-XR_001273710.2_21 [1503 - 1556] gene-LOC106366705 name=LOC106366705 seq_id=NW_019168592.1 type=exon
	MRGIFKTSLITYFRLTLL
	>rna-XR_001273710.2_22 [1561 - 1578] gene-LOC106366705 name=LOC106366705 seq_id=NW_019168592.1 type=exon
	MILAIV
	>rna-XR_001273710.2_23 [1585 - 1653] gene-LOC106366705 name=LOC106366705 seq_id=NW_019168592.1 type=exon
	MLQITDHVEIEIKVMIIVYESQR
	>rna-XR_001273710.2_24 [1713 - 1751] gene-LOC106366705 name=LOC106366705 seq_id=NW_019168592.1 type=exon
	MANTTSLFLDSAH
	>rna-XR_001273710.2_25 [1754 - 1786] gene-LOC106366705 name=LOC106366705 seq_id=NW_019168592.1 type=exon
	MYVWVIAKLPV
	>rna-XR_001273710.2_26 [1814 - 1846] gene-LOC106366705 name=LOC106366705 seq_id=NW_019168592.1 type=exon
	MFSHLKQMNSI
	>rna-XR_001273710.2_27 [1898 - 1918] gene-LOC106366705 name=LOC106366705 seq_id=NW_019168592.1 type=exon
	MLLNLRI
	>rna-XR_001273710.2_28 [1950 - 1976] gene-LOC106366705 name=LOC106366705 seq_id=NW_019168592.1 type=exon
	MFGKKQNFL
	>rna-XR_001273707.2_1 [14 - 112] gene-LOC106366705 name=LOC106366705 seq_id=NW_019168592.1 type=exon
	MFDYDYKLRHLSSLFFPCNVLVSPPPQNPTSDN
	>rna-XR_001273707.2_2 [69 - 128] gene-LOC106366705 name=LOC106366705 seq_id=NW_019168592.1 type=exon
	MFWSLLLLKTQLLITKIFIG
	>rna-XR_001273707.2_3 [214 - 237] gene-LOC106366705 name=LOC106366705 seq_id=NW_019168592.1 type=exon
	MDLFLCWF
	>rna-XR_001273707.2_4 [228 - 245] gene-LOC106366705 name=LOC106366705 seq_id=NW_019168592.1 type=exon
	MLVLRG
	>rna-XR_001273707.2_5 [326 - 394] gene-LOC106366705 name=LOC106366705 seq_id=NW_019168592.1 type=exon
	MYPGPAEAQVQGGVDPGSKFFFS
	>rna-XR_001273707.2_6 [318 - 398] gene-LOC106366705 name=LOC106366705 seq_id=NW_019168592.1 type=exon
	MYQCIQGRLRRRYKGAWTQGPNFFFHN
	>rna-XR_001273707.2_7 [409 - 438] gene-LOC106366705 name=LOC106366705 seq_id=NW_019168592.1 type=exon
	MELDFQKKKI
	>rna-XR_001273707.2_8 [529 - 558] gene-LOC106366705 name=LOC106366705 seq_id=NW_019168592.1 type=exon
	MSWPWMYLSN
	>rna-XR_001273707.2_9 [581 - 628] gene-LOC106366705 name=LOC106366705 seq_id=NW_019168592.1 type=exon
	MCFLLFFMDACMYVCV
	>rna-XR_001273707.2_10 [610 - 636] gene-LOC106366705 name=LOC106366705 seq_id=NW_019168592.1 type=exon
	MHVCVCISV
	>rna-XR_001273707.2_11 [606 - 689] gene-LOC106366705 name=LOC106366705 seq_id=NW_019168592.1 type=exon
	MHACMCVYKCIDSGTRSSCGFIHSNHQQ
	>rna-XR_001273707.2_12 [762 - 794] gene-LOC106366705 name=LOC106366705 seq_id=NW_019168592.1 type=exon
	MPHHQLEGGKC
	>rna-XR_001273707.2_13 [689 - 868] gene-LOC106366705 name=LOC106366705 seq_id=NW_019168592.1 type=exon
	MNLSFLRKTIPAVDFYDFPLLSLENATSSVRRGQMLTRQFLYLKTQMFRLFENFLMGQLL
	>rna-XR_001273707.2_14 [913 - 984] gene-LOC106366705 name=LOC106366705 seq_id=NW_019168592.1 type=exon
	MFDHFVNDGLLGEFNYNEKPIYVL
	>rna-XR_001273707.2_15 [1112 - 1180] gene-LOC106366705 name=LOC106366705 seq_id=NW_019168592.1 type=exon
	MIAITTIKPLSPLLRIDFIIHPW
	>rna-XR_001273707.2_16 [1232 - 1261] gene-LOC106366705 name=LOC106366705 seq_id=NW_019168592.1 type=exon
	MSIISPKKTF
	>rna-XR_001273707.2_17 [1177 - 1269] gene-LOC106366705 name=LOC106366705 seq_id=NW_019168592.1 type=exon
	MVTPECLKPRVINTLEAGHVNNLSQKNILNF
	>rna-XR_001273707.2_18 [1294 - 1323] gene-LOC106366705 name=LOC106366705 seq_id=NW_019168592.1 type=exon
	MATSRIILNN
	>rna-XR_001273707.2_19 [1434 - 1547] gene-LOC106366705 name=LOC106366705 seq_id=NW_019168592.1 type=exon
	MRYLLSTAMLVYQSIQLVNLKFVTKVNNLLSFFAVCIL
	>rna-XR_001273707.2_20 [1560 - 1589] gene-LOC106366705 name=LOC106366705 seq_id=NW_019168592.1 type=exon
	MKGYDQLIQF
	>rna-XR_001273707.2_21 [1570 - 1605] gene-LOC106366705 name=LOC106366705 seq_id=NW_019168592.1 type=exon
	MINSFSFDYNVY
	>rna-XR_001273707.2_22 [1680 - 1718] gene-LOC106366705 name=LOC106366705 seq_id=NW_019168592.1 type=exon
	MPARLWEEKTQKK
	>rna-XR_001273707.2_23 [1598 - 1783] gene-LOC106366705 name=LOC106366705 seq_id=NW_019168592.1 type=exon
	MYIKNFSAFQQKLTMEDQNKPFTTTRGHAGQIVGRKNSEKVRMRKKKGSLVTGTFQNQIF
	QK
	>rna-XR_001273707.2_24 [1837 - 1887] gene-LOC106366705 name=LOC106366705 seq_id=NW_019168592.1 type=exon
	MFQSLAKDGTIQVMKKS
	>rna-XR_001273707.2_25 [1947 - 2000] gene-LOC106366705 name=LOC106366705 seq_id=NW_019168592.1 type=exon
	MRGIFKTSLITYFRLTLL
	>rna-XR_001273707.2_26 [2005 - 2022] gene-LOC106366705 name=LOC106366705 seq_id=NW_019168592.1 type=exon
	MILAIV
	>rna-XR_001273707.2_27 [2029 - 2097] gene-LOC106366705 name=LOC106366705 seq_id=NW_019168592.1 type=exon
	MLQITDHVEIEIKVMIIVYESQR
	>rna-XR_001273707.2_28 [2157 - 2195] gene-LOC106366705 name=LOC106366705 seq_id=NW_019168592.1 type=exon
	MANTTSLFLDSAH
	>rna-XR_001273707.2_29 [2198 - 2230] gene-LOC106366705 name=LOC106366705 seq_id=NW_019168592.1 type=exon
	MYVWVIAKLPV
	>rna-XR_001273707.2_30 [2258 - 2290] gene-LOC106366705 name=LOC106366705 seq_id=NW_019168592.1 type=exon
	MFSHLKQMNSI
	>rna-XR_001273707.2_31 [2342 - 2362] gene-LOC106366705 name=LOC106366705 seq_id=NW_019168592.1 type=exon
	MLLNLRI
	>rna-XR_001273707.2_32 [2394 - 2420] gene-LOC106366705 name=LOC106366705 seq_id=NW_019168592.1 type=exon
	MFGKKQNFL
	>rna-XR_001273708.2_1 [13 - 111] gene-LOC106366705 name=LOC106366705 seq_id=NW_019168592.1 type=exon
	MFDYDYKLRHLSSLFFPCNVLVSPPPQNPTSDN
	>rna-XR_001273708.2_2 [68 - 127] gene-LOC106366705 name=LOC106366705 seq_id=NW_019168592.1 type=exon
	MFWSLLLLKTQLLITKIFIG
	>rna-XR_001273708.2_3 [213 - 236] gene-LOC106366705 name=LOC106366705 seq_id=NW_019168592.1 type=exon
	MDLFLCWF
	>rna-XR_001273708.2_4 [227 - 244] gene-LOC106366705 name=LOC106366705 seq_id=NW_019168592.1 type=exon
	MLVLRG
	>rna-XR_001273708.2_5 [325 - 393] gene-LOC106366705 name=LOC106366705 seq_id=NW_019168592.1 type=exon
	MYPGPAEAQVQGGVDPGSKFFFS
	>rna-XR_001273708.2_6 [317 - 397] gene-LOC106366705 name=LOC106366705 seq_id=NW_019168592.1 type=exon
	MYQCIQGRLRRRYKGAWTQGPNFFFHN
	>rna-XR_001273708.2_7 [408 - 437] gene-LOC106366705 name=LOC106366705 seq_id=NW_019168592.1 type=exon
	MELDFQKKKI
	>rna-XR_001273708.2_8 [528 - 557] gene-LOC106366705 name=LOC106366705 seq_id=NW_019168592.1 type=exon
	MSWPWMYLSN
	>rna-XR_001273708.2_9 [580 - 627] gene-LOC106366705 name=LOC106366705 seq_id=NW_019168592.1 type=exon
	MCFLLFFMDACMYVCV
	>rna-XR_001273708.2_10 [609 - 635] gene-LOC106366705 name=LOC106366705 seq_id=NW_019168592.1 type=exon
	MHVCVCISV
	>rna-XR_001273708.2_11 [605 - 688] gene-LOC106366705 name=LOC106366705 seq_id=NW_019168592.1 type=exon
	MHACMCVYKCIDSGTRSSCGFIHSNHQQ
	>rna-XR_001273708.2_12 [761 - 793] gene-LOC106366705 name=LOC106366705 seq_id=NW_019168592.1 type=exon
	MPHHQLEGGKC
	>rna-XR_001273708.2_13 [688 - 867] gene-LOC106366705 name=LOC106366705 seq_id=NW_019168592.1 type=exon
	MNLSFLRKTIPAVDFYDFPLLSLENATSSVRRGQMLTRQFLYLKTQMFRLFENFLMGQLL
	>rna-XR_001273708.2_14 [912 - 983] gene-LOC106366705 name=LOC106366705 seq_id=NW_019168592.1 type=exon
	MFDHFVNDGLLGEFNYNEKPIYVL
	>rna-XR_001273708.2_15 [1111 - 1179] gene-LOC106366705 name=LOC106366705 seq_id=NW_019168592.1 type=exon
	MIAITTIKPLSPLLRIDFIIHPW
	>rna-XR_001273708.2_16 [1231 - 1260] gene-LOC106366705 name=LOC106366705 seq_id=NW_019168592.1 type=exon
	MSIISPKKTF
	>rna-XR_001273708.2_17 [1176 - 1268] gene-LOC106366705 name=LOC106366705 seq_id=NW_019168592.1 type=exon
	MVTPECLKPRVINTLEAGHVNNLSQKNILNF
	>rna-XR_001273708.2_18 [1293 - 1322] gene-LOC106366705 name=LOC106366705 seq_id=NW_019168592.1 type=exon
	MATSRIILNN
	>rna-XR_001273708.2_19 [1490 - 1528] gene-LOC106366705 name=LOC106366705 seq_id=NW_019168592.1 type=exon
	MPARLWEEKTQKK
	>rna-XR_001273708.2_20 [1450 - 1593] gene-LOC106366705 name=LOC106366705 seq_id=NW_019168592.1 type=exon
	MEDQNKPFTTTRGHAGQIVGRKNSEKVRMRKKKGSLVTGTFQNQIFQK
	>rna-XR_001273708.2_21 [1647 - 1697] gene-LOC106366705 name=LOC106366705 seq_id=NW_019168592.1 type=exon
	MFQSLAKDGTIQVMKKS
	>rna-XR_001273708.2_22 [1757 - 1810] gene-LOC106366705 name=LOC106366705 seq_id=NW_019168592.1 type=exon
	MRGIFKTSLITYFRLTLL
	>rna-XR_001273708.2_23 [1815 - 1832] gene-LOC106366705 name=LOC106366705 seq_id=NW_019168592.1 type=exon
	MILAIV
	>rna-XR_001273708.2_24 [1839 - 1907] gene-LOC106366705 name=LOC106366705 seq_id=NW_019168592.1 type=exon
	MLQITDHVEIEIKVMIIVYESQR
	>rna-XR_001273708.2_25 [1967 - 2005] gene-LOC106366705 name=LOC106366705 seq_id=NW_019168592.1 type=exon
	MANTTSLFLDSAH
	>rna-XR_001273708.2_26 [2008 - 2040] gene-LOC106366705 name=LOC106366705 seq_id=NW_019168592.1 type=exon
	MYVWVIAKLPV
	>rna-XR_001273708.2_27 [2068 - 2100] gene-LOC106366705 name=LOC106366705 seq_id=NW_019168592.1 type=exon
	MFSHLKQMNSI
	>rna-XR_001273708.2_28 [2152 - 2172] gene-LOC106366705 name=LOC106366705 seq_id=NW_019168592.1 type=exon
	MLLNLRI
	>rna-XR_001273708.2_29 [2204 - 2230] gene-LOC106366705 name=LOC106366705 seq_id=NW_019168592.1 type=exon
	MFGKKQNFL
	>rna-XR_002661141.1_1 [7 - 48] gene-LOC111209711 name=LOC111209711 seq_id=NC_027775.2 type=exon
	MKIFGVLCVASFSS
	>rna-XR_002661141.1_2 [77 - 97] gene-LOC111209711 name=LOC111209711 seq_id=NC_027775.2 type=exon
	MFCPLCM
	>rna-XR_002661141.1_3 [48 - 149] gene-LOC111209711 name=LOC111209711 seq_id=NC_027775.2 type=exon
	MKRNSIYQLKCSVPFACKRDKETDKSHKERGLSE
	>rna-XR_002661141.1_4 [333 - 350] gene-LOC111209711 name=LOC111209711 seq_id=NC_027775.2 type=exon
	MVPCLL
	>rna-XR_002661141.1_5 [232 - 378] gene-LOC111209711 name=LOC111209711 seq_id=NC_027775.2 type=exon
	MFFLDLDKNPRLDFPKGVLNSISFLYSYVCIFSLWFLVYFNLWRWKNCE
	>rna-XR_002661141.1_6 [314 - 382] gene-LOC111209711 name=LOC111209711 seq_id=NC_027775.2 type=exon
	MCVFSLYGSLSTLISGDGRTASE
	>rna-XR_002661141.1_7 [382 - 405] gene-LOC111209711 name=LOC111209711 seq_id=NC_027775.2 type=exon
	MSWDKRKT
	>rna-XR_002661141.1_8 [363 - 425] gene-LOC111209711 name=LOC111209711 seq_id=NC_027775.2 type=exon
	MEELRVNELGQKKNIATDRRE
	>rna-XR_002661141.1_9 [612 - 659] gene-LOC111209711 name=LOC111209711 seq_id=NC_027775.2 type=exon
	MRFKRWLVPCIDFGSI
	>rna-XR_002661141.1_10 [667 - 708] gene-LOC111209711 name=LOC111209711 seq_id=NC_027775.2 type=exon
	MRGESFKLSPFIIL
	>rna-XR_002661141.1_11 [715 - 735] gene-LOC111209711 name=LOC111209711 seq_id=NC_027775.2 type=exon
	MGSIEKA
	>rna-XR_002661141.1_12 [626 - 742] gene-LOC111209711 name=LOC111209711 seq_id=NC_027775.2 type=exon
	MACSLYRFWFDLIACEVRALNFHHSLYFNVWVVSRKLNL
	>rna-XR_002661141.1_13 [762 - 782] gene-LOC111209711 name=LOC111209711 seq_id=NC_027775.2 type=exon
	MKLSMST
	>rna-XR_002661141.1_14 [820 - 867] gene-LOC111209711 name=LOC111209711 seq_id=NC_027775.2 type=exon
	MYILYYHLFFPFLGAF
	>rna-XR_002661141.1_15 [1025 - 1066] gene-LOC111209711 name=LOC111209711 seq_id=NC_027775.2 type=exon
	MVCSYILIPRSIII
	>rna-XR_002661141.1_16 [955 - 1119] gene-LOC111209711 name=LOC111209711 seq_id=NC_027775.2 type=exon
	MLQEYSGHDICIIRKSRWLLGYLNGLLVHFDSTKYNYIIIFYSLYIYQKNNYVGI
	>rna-XR_002661141.1_17 [1109 - 1132] gene-LOC111209711 name=LOC111209711 seq_id=NC_027775.2 type=exon
	MLAYNIIS
	>rna-XR_002661141.1_18 [1170 - 1187] gene-LOC111209711 name=LOC111209711 seq_id=NC_027775.2 type=exon
	MLHLLT
	>rna-XR_002661141.1_19 [1187 - 1231] gene-LOC111209711 name=LOC111209711 seq_id=NC_027775.2 type=exon
	MNILRIFLWWFVFLD
	>rna-XR_002661141.1_20 [1255 - 1281] gene-LOC111209711 name=LOC111209711 seq_id=NC_027775.2 type=exon
	MQTKKAYSV
	>rna-XR_002661141.1_21 [1309 - 1338] gene-LOC111209711 name=LOC111209711 seq_id=NC_027775.2 type=exon
	MCHVFPLLYC
	>rna-XR_002661141.1_22 [1316 - 1390] gene-LOC111209711 name=LOC111209711 seq_id=NC_027775.2 type=exon
	MSFRFCTVEAVEKYCCLSTNINTSN
	>rna-XR_002661141.1_23 [1281 - 1433] gene-LOC111209711 name=LOC111209711 seq_id=NC_027775.2 type=exon
	MKLLCWFHIDVSCLSAFVLLRLLKNIVVCRQISIPVINFRSYCYNCYLSVD
	>rna-XR_002661141.1_24 [1494 - 1541] gene-LOC111209711 name=LOC111209711 seq_id=NC_027775.2 type=exon
	MCVSHRKRSLYILQSL
	>rna-XR_002661141.1_25 [1436 - 1573] gene-LOC111209711 name=LOC111209711 seq_id=NC_027775.2 type=exon
	MSRWAETMVILIPVRIVWSDVCITSEAIFVYIAIVVMFVSQMHNMF
	>rna-XR_002661141.1_26 [1632 - 1661] gene-LOC111209711 name=LOC111209711 seq_id=NC_027775.2 type=exon
	MNHIVYGFLS
	>rna-XR_002661140.1_1 [7 - 48] gene-LOC111209711 name=LOC111209711 seq_id=NC_027775.2 type=exon
	MKIFGVLCVASFSS
	>rna-XR_002661140.1_2 [77 - 97] gene-LOC111209711 name=LOC111209711 seq_id=NC_027775.2 type=exon
	MFCPLCM
	>rna-XR_002661140.1_3 [48 - 149] gene-LOC111209711 name=LOC111209711 seq_id=NC_027775.2 type=exon
	MKRNSIYQLKCSVPFACKRDKETDKSHKERGLSE
	>rna-XR_002661140.1_4 [232 - 345] gene-LOC111209711 name=LOC111209711 seq_id=NC_027775.2 type=exon
	MFFLDLDKNPRLDFPKGVLNSISFLYSYISGDGRTASE
	>rna-XR_002661140.1_5 [345 - 368] gene-LOC111209711 name=LOC111209711 seq_id=NC_027775.2 type=exon
	MSWDKRKT
	>rna-XR_002661140.1_6 [326 - 388] gene-LOC111209711 name=LOC111209711 seq_id=NC_027775.2 type=exon
	MEELRVNELGQKKNIATDRRE
	>rna-XR_002661140.1_7 [575 - 622] gene-LOC111209711 name=LOC111209711 seq_id=NC_027775.2 type=exon
	MRFKRWLVPCIDFGSI
	>rna-XR_002661140.1_8 [630 - 671] gene-LOC111209711 name=LOC111209711 seq_id=NC_027775.2 type=exon
	MRGESFKLSPFIIL
	>rna-XR_002661140.1_9 [678 - 698] gene-LOC111209711 name=LOC111209711 seq_id=NC_027775.2 type=exon
	MGSIEKA
	>rna-XR_002661140.1_10 [589 - 705] gene-LOC111209711 name=LOC111209711 seq_id=NC_027775.2 type=exon
	MACSLYRFWFDLIACEVRALNFHHSLYFNVWVVSRKLNL
	>rna-XR_002661140.1_11 [725 - 745] gene-LOC111209711 name=LOC111209711 seq_id=NC_027775.2 type=exon
	MKLSMST
	>rna-XR_002661140.1_12 [783 - 830] gene-LOC111209711 name=LOC111209711 seq_id=NC_027775.2 type=exon
	MYILYYHLFFPFLGAF
	>rna-XR_002661140.1_13 [988 - 1029] gene-LOC111209711 name=LOC111209711 seq_id=NC_027775.2 type=exon
	MVCSYILIPRSIII
	>rna-XR_002661140.1_14 [918 - 1082] gene-LOC111209711 name=LOC111209711 seq_id=NC_027775.2 type=exon
	MLQEYSGHDICIIRKSRWLLGYLNGLLVHFDSTKYNYIIIFYSLYIYQKNNYVGI
	>rna-XR_002661140.1_15 [1072 - 1095] gene-LOC111209711 name=LOC111209711 seq_id=NC_027775.2 type=exon
	MLAYNIIS
	>rna-XR_002661140.1_16 [1133 - 1150] gene-LOC111209711 name=LOC111209711 seq_id=NC_027775.2 type=exon
	MLHLLT
	>rna-XR_002661140.1_17 [1150 - 1194] gene-LOC111209711 name=LOC111209711 seq_id=NC_027775.2 type=exon
	MNILRIFLWWFVFLD
	>rna-XR_002661140.1_18 [1218 - 1244] gene-LOC111209711 name=LOC111209711 seq_id=NC_027775.2 type=exon
	MQTKKAYSV
	>rna-XR_002661140.1_19 [1272 - 1301] gene-LOC111209711 name=LOC111209711 seq_id=NC_027775.2 type=exon
	MCHVFPLLYC
	>rna-XR_002661140.1_20 [1279 - 1353] gene-LOC111209711 name=LOC111209711 seq_id=NC_027775.2 type=exon
	MSFRFCTVEAVEKYCCLSTNINTSN
	>rna-XR_002661140.1_21 [1244 - 1396] gene-LOC111209711 name=LOC111209711 seq_id=NC_027775.2 type=exon
	MKLLCWFHIDVSCLSAFVLLRLLKNIVVCRQISIPVINFRSYCYNCYLSVD
	>rna-XR_002661140.1_22 [1457 - 1504] gene-LOC111209711 name=LOC111209711 seq_id=NC_027775.2 type=exon
	MCVSHRKRSLYILQSL
	>rna-XR_002661140.1_23 [1399 - 1536] gene-LOC111209711 name=LOC111209711 seq_id=NC_027775.2 type=exon
	MSRWAETMVILIPVRIVWSDVCITSEAIFVYIAIVVMFVSQMHNMF
	>rna-XR_002661140.1_24 [1595 - 1624] gene-LOC111209711 name=LOC111209711 seq_id=NC_027775.2 type=exon
	MNHIVYGFLS
	>rna-XR_002661139.1_1 [7 - 48] gene-LOC111209711 name=LOC111209711 seq_id=NC_027775.2 type=exon
	MKIFGVLCVASFSS
	>rna-XR_002661139.1_2 [77 - 97] gene-LOC111209711 name=LOC111209711 seq_id=NC_027775.2 type=exon
	MFCPLCM
	>rna-XR_002661139.1_3 [48 - 149] gene-LOC111209711 name=LOC111209711 seq_id=NC_027775.2 type=exon
	MKRNSIYQLKCSVPFACKRDKETDKSHKERGLSE
	>rna-XR_002661139.1_4 [232 - 306] gene-LOC111209711 name=LOC111209711 seq_id=NC_027775.2 type=exon
	MFFLDLDKNPRLDFPKDLWRWKNCE
	>rna-XR_002661139.1_5 [310 - 333] gene-LOC111209711 name=LOC111209711 seq_id=NC_027775.2 type=exon
	MSWDKRKT
	>rna-XR_002661139.1_6 [291 - 353] gene-LOC111209711 name=LOC111209711 seq_id=NC_027775.2 type=exon
	MEELRVNELGQKKNIATDRRE
	>rna-XR_002661139.1_7 [540 - 587] gene-LOC111209711 name=LOC111209711 seq_id=NC_027775.2 type=exon
	MRFKRWLVPCIDFGSI
	>rna-XR_002661139.1_8 [595 - 636] gene-LOC111209711 name=LOC111209711 seq_id=NC_027775.2 type=exon
	MRGESFKLSPFIIL
	>rna-XR_002661139.1_9 [643 - 663] gene-LOC111209711 name=LOC111209711 seq_id=NC_027775.2 type=exon
	MGSIEKA
	>rna-XR_002661139.1_10 [554 - 670] gene-LOC111209711 name=LOC111209711 seq_id=NC_027775.2 type=exon
	MACSLYRFWFDLIACEVRALNFHHSLYFNVWVVSRKLNL
	>rna-XR_002661139.1_11 [690 - 710] gene-LOC111209711 name=LOC111209711 seq_id=NC_027775.2 type=exon
	MKLSMST
	>rna-XR_002661139.1_12 [748 - 795] gene-LOC111209711 name=LOC111209711 seq_id=NC_027775.2 type=exon
	MYILYYHLFFPFLGAF
	>rna-XR_002661139.1_13 [953 - 994] gene-LOC111209711 name=LOC111209711 seq_id=NC_027775.2 type=exon
	MVCSYILIPRSIII
	>rna-XR_002661139.1_14 [883 - 1047] gene-LOC111209711 name=LOC111209711 seq_id=NC_027775.2 type=exon
	MLQEYSGHDICIIRKSRWLLGYLNGLLVHFDSTKYNYIIIFYSLYIYQKNNYVGI
	>rna-XR_002661139.1_15 [1037 - 1060] gene-LOC111209711 name=LOC111209711 seq_id=NC_027775.2 type=exon
	MLAYNIIS
	>rna-XR_002661139.1_16 [1098 - 1115] gene-LOC111209711 name=LOC111209711 seq_id=NC_027775.2 type=exon
	MLHLLT
	>rna-XR_002661139.1_17 [1115 - 1159] gene-LOC111209711 name=LOC111209711 seq_id=NC_027775.2 type=exon
	MNILRIFLWWFVFLD
	>rna-XR_002661139.1_18 [1183 - 1209] gene-LOC111209711 name=LOC111209711 seq_id=NC_027775.2 type=exon
	MQTKKAYSV
	>rna-XR_002661139.1_19 [1237 - 1266] gene-LOC111209711 name=LOC111209711 seq_id=NC_027775.2 type=exon
	MCHVFPLLYC
	>rna-XR_002661139.1_20 [1244 - 1318] gene-LOC111209711 name=LOC111209711 seq_id=NC_027775.2 type=exon
	MSFRFCTVEAVEKYCCLSTNINTSN
	>rna-XR_002661139.1_21 [1209 - 1361] gene-LOC111209711 name=LOC111209711 seq_id=NC_027775.2 type=exon
	MKLLCWFHIDVSCLSAFVLLRLLKNIVVCRQISIPVINFRSYCYNCYLSVD
	>rna-XR_002661139.1_22 [1422 - 1469] gene-LOC111209711 name=LOC111209711 seq_id=NC_027775.2 type=exon
	MCVSHRKRSLYILQSL
	>rna-XR_002661139.1_23 [1364 - 1501] gene-LOC111209711 name=LOC111209711 seq_id=NC_027775.2 type=exon
	MSRWAETMVILIPVRIVWSDVCITSEAIFVYIAIVVMFVSQMHNMF
	>rna-XR_002661139.1_24 [1560 - 1589] gene-LOC111209711 name=LOC111209711 seq_id=NC_027775.2 type=exon
	MNHIVYGFLS
	>rna-XR_001284807.2_1 [56 - 79] gene-LOC106424115 name=LOC106424115 seq_id=NC_027764.2 type=exon
	MLIKQLDL
	>rna-XR_001284807.2_2 [163 - 225] gene-LOC106424115 name=LOC106424115 seq_id=NC_027764.2 type=exon
	MRDFESFCTENLCGFYLIISC
	>rna-XR_001284807.2_3 [198 - 302] gene-LOC106424115 name=LOC106424115 seq_id=NC_027764.2 type=exon
	MWVLFNYKLLEDREEMQQRKLTEESEHLQGTVMCQ
	>rna-XR_001284807.2_4 [445 - 510] gene-LOC106424115 name=LOC106424115 seq_id=NC_027764.2 type=exon
	MGDVDKTDALSLSFRYVLRFFL
	>rna-XR_001284807.2_5 [452 - 529] gene-LOC106424115 name=LOC106424115 seq_id=NC_027764.2 type=exon
	MWIRLTPFHYHFVMCYVFFFSFLYWC
	>rna-XR_001284807.2_6 [562 - 618] gene-LOC106424115 name=LOC106424115 seq_id=NC_027764.2 type=exon
	MFLLKQFGGVKLRFIYQIL
	>rna-XR_001284807.2_7 [673 - 735] gene-LOC106424115 name=LOC106424115 seq_id=NC_027764.2 type=exon
	MIMNPPPENEINIKWEDTSSI
	>rna-XR_001284807.2_8 [698 - 805] gene-LOC106424115 name=LOC106424115 seq_id=NC_027764.2 type=exon
	MRSISSGKILQVYKFQVESVAIRDAFLSHGGFNGVS
	>rna-XR_001284807.2_9 [904 - 921] gene-LOC106424115 name=LOC106424115 seq_id=NC_027764.2 type=exon
	MWMVSV
	>rna-XR_001284807.2_10 [783 - 935] gene-LOC106424115 name=LOC106424115 seq_id=NC_027764.2 type=exon
	MVDSMGFLDLKLKIGKSTCWLLYSEALVDFSLLFVVKNLVHVDGVSLKVLA
	>rna-XR_001284807.2_11 [942 - 962] gene-LOC106424115 name=LOC106424115 seq_id=NC_027764.2 type=exon
	MIRQNLS
	>rna-XR_001284807.2_12 [1044 - 1064] gene-LOC106424115 name=LOC106424115 seq_id=NC_027764.2 type=exon
	MEKVFSI
	>rna-XR_001284807.2_13 [1101 - 1151] gene-LOC106424115 name=LOC106424115 seq_id=NC_027764.2 type=exon
	MGIIFCPWFKFRVHESD
	>rna-XR_001284807.2_14 [1141 - 1158] gene-LOC106424115 name=LOC106424115 seq_id=NC_027764.2 type=exon
	MKVINQ
	>rna-XR_001284807.2_15 [1233 - 1358] gene-LOC106424115 name=LOC106424115 seq_id=NC_027764.2 type=exon
	MKIERGQLQGQVLFQKHLASNAVLCLWGPNAWFTHATLKYIH
	>rna-XR_001284807.2_16 [1294 - 1365] gene-LOC106424115 name=LOC106424115 seq_id=NC_027764.2 type=exon
	MLCYAYGAQMRGSHMQRSNTSIKR
	>rna-XR_001284807.2_17 [1304 - 1405] gene-LOC106424115 name=LOC106424115 seq_id=NC_027764.2 type=exon
	MLMGPKCVVHTCNAQIHPLKDKWGLPFSFFVLSD
	>rna-XR_001284807.2_18 [1440 - 1499] gene-LOC106424115 name=LOC106424115 seq_id=NC_027764.2 type=exon
	MIGVALNGLMISRWKGLKRF
	>rna-XR_001284807.2_19 [1512 - 1562] gene-LOC106424115 name=LOC106424115 seq_id=NC_027764.2 type=exon
	METGALWLDYTHSSPIH
	>rna-XR_001284807.2_20 [1683 - 1766] gene-LOC106424115 name=LOC106424115 seq_id=NC_027764.2 type=exon
	MKWKTSERKNCDDSRTIASLALRFLIRG
	>rna-XR_001284807.2_21 [1785 - 1850] gene-LOC106424115 name=LOC106424115 seq_id=NC_027764.2 type=exon
	MVVRGNKISYDIVNASFPVSEK
	>rna-XR_001284807.2_22 [1813 - 1878] gene-LOC106424115 name=LOC106424115 seq_id=NC_027764.2 type=exon
	MTLLMHHFQCQRNRRWVSSSQS
	>rna-XR_001284807.2_23 [1857 - 1928] gene-LOC106424115 name=LOC106424115 seq_id=NC_027764.2 type=exon
	MGFFFTELASHSLLLILSTCQDKS
	>rna-XR_001284807.2_24 [2103 - 2135] gene-LOC106424115 name=LOC106424115 seq_id=NC_027764.2 type=exon
	MKPRRVSFPSI
	>rna-XR_001284807.2_25 [2087 - 2149] gene-LOC106424115 name=LOC106424115 seq_id=NC_027764.2 type=exon
	MECKIHEAKEGEFPIHIKCLK
	>rna-XR_001278178.2_1 [41 - 58] gene-LOC106390022 name=LOC106390022 seq_id=NC_027769.2 type=exon
	MFNSSN
	>rna-XR_001278178.2_2 [95 - 133] gene-LOC106390022 name=LOC106390022 seq_id=NC_027769.2 type=exon
	MAFSPAVLHTRHL
	>rna-XR_001278178.2_3 [24 - 203] gene-LOC106390022 name=LOC106390022 seq_id=NC_027769.2 type=exon
	MNNRIKCLIHQINRKGKSSHTQHIWPFRRLCYTRATFEKPVYRPGVLFYPVTIKHVFETL
	>rna-XR_001278178.2_4 [301 - 387] gene-LOC106390022 name=LOC106390022 seq_id=NC_027769.2 type=exon
	MSPLAESNTHQTARSLCSLGFGEICENGE
	>rna-XR_001278178.2_5 [393 - 455] gene-LOC106390022 name=LOC106390022 seq_id=NC_027769.2 type=exon
	MREFESFCTENLCGFCLIISC
	>rna-XR_001278178.2_6 [428 - 532] gene-LOC106390022 name=LOC106390022 seq_id=NC_027769.2 type=exon
	MWVLFNYKLLEDREEMQQRKLTEESEHLQGTVMCQ
	>rna-XR_001278178.2_7 [817 - 876] gene-LOC106390022 name=LOC106390022 seq_id=NC_027769.2 type=exon
	MIMNPHRRMRSISSGKILQV
	>rna-XR_001278178.2_8 [675 - 899] gene-LOC106390022 name=LOC106390022 seq_id=NC_027769.2 type=exon
	MVMWIRLSPFHYHSQAVWWSKAQIYISDFVKCAMLFSSTGSRKSASFDDHEPPPENEINI
	KWEDTSSIKISTLKV
	>rna-XR_001278178.2_9 [1048 - 1065] gene-LOC106390022 name=LOC106390022 seq_id=NC_027769.2 type=exon
	MWMVSV
	>rna-XR_001278178.2_10 [927 - 1079] gene-LOC106390022 name=LOC106390022 seq_id=NC_027769.2 type=exon
	MVDSMGFLDLKLKIGKSTCWLLYSEALVDFSLLFVVKNLVHVDGVSLKVLA
	>rna-XR_001278178.2_11 [1085 - 1105] gene-LOC106390022 name=LOC106390022 seq_id=NC_027769.2 type=exon
	MIRQNLS
	>rna-XR_001278178.2_12 [1241 - 1291] gene-LOC106390022 name=LOC106390022 seq_id=NC_027769.2 type=exon
	MGIIFCPWFKFRVHESD
	>rna-XR_001278178.2_13 [1439 - 1459] gene-LOC106390022 name=LOC106390022 seq_id=NC_027769.2 type=exon
	MDLWIAV
	>rna-XR_001271588.2_1 [1 - 99] gene-LOC106352368 name=LOC106352368 seq_id=NC_027765.2 type=exon
	MLDYDYKLRHLSSLFFPFNVLLSPPPQNPTSDN
	>rna-XR_001271588.2_2 [56 - 115] gene-LOC106352368 name=LOC106352368 seq_id=NC_027765.2 type=exon
	MFCSLLPLKTQLLITKIFIG
	>rna-XR_001271588.2_3 [217 - 234] gene-LOC106352368 name=LOC106352368 seq_id=NC_027765.2 type=exon
	MLVLGG
	>rna-XR_001271588.2_4 [203 - 256] gene-LOC106352368 name=LOC106352368 seq_id=NC_027765.2 type=exon
	MDLFLCWFWEAEAASMIW
	>rna-XR_001271588.2_5 [319 - 339] gene-LOC106352368 name=LOC106352368 seq_id=NC_027765.2 type=exon
	MYLSNNI
	>rna-XR_001271588.2_6 [394 - 441] gene-LOC106352368 name=LOC106352368 seq_id=NC_027765.2 type=exon
	MCFLLFFMDACMYVCV
	>rna-XR_001271588.2_7 [423 - 449] gene-LOC106352368 name=LOC106352368 seq_id=NC_027765.2 type=exon
	MHVCVCISV
	>rna-XR_001271588.2_8 [419 - 502] gene-LOC106352368 name=LOC106352368 seq_id=NC_027765.2 type=exon
	MHACMCVYKCIDSGTRSSCGFIHSNHQQ
	>rna-XR_001271588.2_9 [502 - 651] gene-LOC106352368 name=LOC106352368 seq_id=NC_027765.2 type=exon
	MNLSFLRKTIPVDFYDFPGLSLEVPLTKDQAFYNIGCDTSNQWLVLDYLR
	>rna-XR_001271588.2_10 [724 - 807] gene-LOC106352368 name=LOC106352368 seq_id=NC_027765.2 type=exon
	MIDIWIVLRSCILISLLILASIMSFVHS
	>rna-XR_001271588.2_11 [735 - 815] gene-LOC106352368 name=LOC106352368 seq_id=NC_027765.2 type=exon
	MDCIKIMHINFLTYTCIHYVFCSFVRI
	>rna-XR_001271588.2_12 [887 - 970] gene-LOC106352368 name=LOC106352368 seq_id=NC_027765.2 type=exon
	MQTVYSLIFFMNVCNMQQSFLLLEFFCR
	>rna-XR_001271588.2_13 [921 - 971] gene-LOC106352368 name=LOC106352368 seq_id=NC_027765.2 type=exon
	MFVICSSLFYCLNFFVG
	>rna-XR_001274070.2_1 [19 - 87] gene-LOC106368582 name=LOC106368582 seq_id=NC_027765.2 type=exon
	MKLYKLKCSVQFNASADICSLCM
	>rna-XR_001274070.2_2 [39 - 131] gene-LOC106368582 name=LOC106368582 seq_id=NC_027765.2 type=exon
	MFCSIQCLGRHLFPLHVREIKKATKAIKKDL
	>rna-XR_001274070.2_3 [56 - 148] gene-LOC106368582 name=LOC106368582 seq_id=NC_027765.2 type=exon
	MPRQTSVPFACKRDKESDKSHKERSLELDEL
	>rna-XR_001274070.2_4 [156 - 278] gene-LOC106368582 name=LOC106368582 seq_id=NC_027765.2 type=exon
	MSWGKRNTQKLTEESEHTKVNCICCICFSCVLTALSVRFPC
	>rna-XR_001274070.2_5 [224 - 391] gene-LOC106368582 name=LOC106368582 seq_id=NC_027765.2 type=exon
	MLHLLLLRAHCSFCQIPVLISLACPCSSLSQSLSLSHTQALSLSLDYFQTKVRIYH
	>rna-XR_001274070.2_6 [396 - 464] gene-LOC106368582 name=LOC106368582 seq_id=NC_027765.2 type=exon
	MMACSCVLILVRSDCMRCEIFKL
	>rna-XR_001274070.2_7 [599 - 637] gene-LOC106368582 name=LOC106368582 seq_id=NC_027765.2 type=exon
	MYILLFIFFFLSF
	>rna-XR_001274070.2_8 [690 - 722] gene-LOC106368582 name=LOC106368582 seq_id=NC_027765.2 type=exon
	MRSSYHLIFRE
	>rna-XR_001274070.2_9 [493 - 777] gene-LOC106368582 name=LOC106368582 seq_id=NC_027765.2 type=exon
	MRNIEKAISLCVNAWLSEIKHGNLVLIRLVLNFSIHVYIIVYFFLFVFLIPCSILYSHIN
	NMSFDSCDHHIISFFVNKMLQDNFVIIRMSRWHFS
	>rna-XR_001274070.2_10 [811 - 849] gene-LOC106368582 name=LOC106368582 seq_id=NC_027765.2 type=exon
	MRHIISLLYKELC
	>rna-XR_001274070.2_11 [846 - 914] gene-LOC106368582 name=LOC106368582 seq_id=NC_027765.2 type=exon
	MLVYTSAKKKLCRYIVSCNYLFL
	>rna-XR_001274070.2_12 [926 - 991] gene-LOC106368582 name=LOC106368582 seq_id=NC_027765.2 type=exon
	MLHFMNLFMLMKIQLYVALLIT
	>rna-XR_001274070.2_13 [1048 - 1113] gene-LOC106368582 name=LOC106368582 seq_id=NC_027765.2 type=exon
	MFLFSLAFQTHILNATNTAYNV
	>rna-XR_001274070.2_14 [1113 - 1172] gene-LOC106368582 name=LOC106368582 seq_id=NC_027765.2 type=exon
	MSFWYWCHMLMCHVFPLLYC
	>rna-XR_001274070.2_15 [1150 - 1218] gene-LOC106368582 name=LOC106368582 seq_id=NC_027765.2 type=exon
	MSFRFCTVKDVEKYCCLSTKYQY
	>rna-XR_001274070.2_16 [1088 - 1225] gene-LOC106368582 name=LOC106368582 seq_id=NC_027765.2 type=exon
	MQLIQPIMYEFLVLVPHVDVSCLSAFVLLRMLKNIVVCRQNINTSN
	>rna-XR_001274070.2_17 [1330 - 1368] gene-LOC106368582 name=LOC106368582 seq_id=NC_027765.2 type=exon
	MHHIRIDISIAIV
	>rna-XR_001274070.2_18 [1274 - 1384] gene-LOC106368582 name=LOC106368582 seq_id=NC_027765.2 type=exon
	MSCWAEIVMMPVRILWSSECIIYESIYPLQLSDAFIS
	>rna-XR_001274070.2_19 [1436 - 1459] gene-LOC106368582 name=LOC106368582 seq_id=NC_027765.2 type=exon
	MEYMRMDF
	>rna-XR_001274070.2_20 [1468 - 1497] gene-LOC106368582 name=LOC106368582 seq_id=NC_027765.2 type=exon
	MISEVLAPAL
	>rna-XR_001274070.2_21 [1519 - 1536] gene-LOC106368582 name=LOC106368582 seq_id=NC_027765.2 type=exon
	MSSLEI
	>rna-XR_001274070.2_22 [1371 - 1562] gene-LOC106368582 name=LOC106368582 seq_id=NC_027765.2 type=exon
	MLLLVKAVFDLDICRENEIWRTWNTCVWIFELDDFRGVGSSFINLLVCVHELSRDLEYKS
	ICKL
	>rna-XR_001274070.2_23 [1572 - 1595] gene-LOC106368582 name=LOC106368582 seq_id=NC_027765.2 type=exon
	MQIHILYR
	>rna-XR_002659848.1_1 [12 - 29] gene-LOC106407493 name=LOC106407493 seq_id=NC_027773.2 type=exon
	MADEQE
	>rna-XR_002659848.1_2 [78 - 110] gene-LOC106407493 name=LOC106407493 seq_id=NC_027773.2 type=exon
	MRSDRRIHWTR
	>rna-XR_002659848.1_3 [144 - 185] gene-LOC106407493 name=LOC106407493 seq_id=NC_027773.2 type=exon
	MCYTRATSGKAGLN
	>rna-XR_002659848.1_4 [125 - 205] gene-LOC106407493 name=LOC106407493 seq_id=NC_027773.2 type=exon
	MSPISPDVLHTRHLWKSWFKLNCFFFL
	>rna-XR_002659848.1_5 [604 - 669] gene-LOC106407493 name=LOC106407493 seq_id=NC_027773.2 type=exon
	MQALLCVHNSACACSPLFLSVA
	>rna-XR_002659848.1_6 [790 - 834] gene-LOC106407493 name=LOC106407493 seq_id=NC_027773.2 type=exon
	MWIRLTPFRYQFHYV
	>rna-XR_002659848.1_7 [830 - 862] gene-LOC106407493 name=LOC106407493 seq_id=NC_027773.2 type=exon
	MCRYYLLFFVC
	>rna-XR_002659848.1_8 [895 - 915] gene-LOC106407493 name=LOC106407493 seq_id=NC_027773.2 type=exon
	MFVLFFS
	>rna-XR_002659848.1_9 [873 - 983] gene-LOC106407493 name=LOC106407493 seq_id=NC_027773.2 type=exon
	MGACTLKNVCSFLFLRKRMFVLKQFGGEKLRFKYVGL
	>rna-XR_002659848.1_10 [983 - 1102] gene-LOC106407493 name=LOC106407493 seq_id=NC_027773.2 type=exon
	MININLKCVLFVFFLVDLGKARVLMIINPHRYMMQVNLGL
	>rna-XR_002659848.1_11 [973 - 1191] gene-LOC106407493 name=LOC106407493 seq_id=NC_027773.2 type=exon
	MWVYDKYKFKVCFICVFSSGSRKSASFDDHKSPPLHDASEPRIMKLFFSFFCLLSFQTRC
	GFQVSDFQLIYFM
	>rna-XR_002659848.1_12 [1149 - 1214] gene-LOC106407493 name=LOC106407493 seq_id=NC_027773.2 type=exon
	MWLSGFRFSVDLFHVDSSSVPF
	>rna-XR_002659848.1_13 [1239 - 1262] gene-LOC106407493 name=LOC106407493 seq_id=NC_027773.2 type=exon
	MNKFAMKH
	>rna-XR_002659848.1_14 [1436 - 1504] gene-LOC106407493 name=LOC106407493 seq_id=NC_027773.2 type=exon
	MKRLNPRPNAFPCKFLHFCFQLC
	>rna-XR_002659848.1_15 [1461 - 1517] gene-LOC106407493 name=LOC106407493 seq_id=NC_027773.2 type=exon
	MLFLANFFIFASNFARKLI
	>rna-XR_002659848.1_16 [1586 - 1603] gene-LOC106407493 name=LOC106407493 seq_id=NC_027773.2 type=exon
	MVPKEF
	>rna-XR_002659848.1_17 [1554 - 1676] gene-LOC106407493 name=LOC106407493 seq_id=NC_027773.2 type=exon
	MLVSVEMLYLIWYQRSFKMLVYTEIVYFLLPKVYKPFFFFY
	>rna-XR_002659848.1_18 [1681 - 1731] gene-LOC106407493 name=LOC106407493 seq_id=NC_027773.2 type=exon
	MIGIMKVSEFTIFHLIY
	>rna-XR_002659848.1_19 [1736 - 1759] gene-LOC106407493 name=LOC106407493 seq_id=NC_027773.2 type=exon
	MIGIILLV
	>rna-XR_002659848.1_20 [1772 - 1837] gene-LOC106407493 name=LOC106407493 seq_id=NC_027773.2 type=exon
	MLVKLNLCLFMIYFYQNQVLCN
	>rna-XR_002659848.1_21 [1887 - 1916] gene-LOC106407493 name=LOC106407493 seq_id=NC_027773.2 type=exon
	MQYNEFNLYV
	>rna-XR_002659848.1_22 [1912 - 1959] gene-LOC106407493 name=LOC106407493 seq_id=NC_027773.2 type=exon
	MYKFVFPLHNIDSIGP
	>rna-XR_002659848.1_23 [2005 - 2022] gene-LOC106407493 name=LOC106407493 seq_id=NC_027773.2 type=exon
	MIEVWK
	>rna-XR_002659848.1_24 [2032 - 2070] gene-LOC106407493 name=LOC106407493 seq_id=NC_027773.2 type=exon
	METEMLEIIYLSS
	>rna-XR_002659848.1_25 [2074 - 2097] gene-LOC106407493 name=LOC106407493 seq_id=NC_027773.2 type=exon
	MVGLKLPD
	>rna-XR_002659848.1_26 [2115 - 2216] gene-LOC106407493 name=LOC106407493 seq_id=NC_027773.2 type=exon
	MLLVLCLFDLYLCCASLFLMSSKRFLSTGCLVLQ
	>rna-XR_002659848.1_27 [2201 - 2263] gene-LOC106407493 name=LOC106407493 seq_id=NC_027773.2 type=exon
	MPGFAMILSSYSYKRHYSNGV
	>rna-XR_002659848.1_28 [2293 - 2334] gene-LOC106407493 name=LOC106407493 seq_id=NC_027773.2 type=exon
	MNEYLFDYTRSIYR
	>rna-XR_002659848.1_29 [2356 - 2379] gene-LOC106407493 name=LOC106407493 seq_id=NC_027773.2 type=exon
	MKSNCKSS
	>rna-XR_002659848.1_30 [2637 - 2654] gene-LOC106407493 name=LOC106407493 seq_id=NC_027773.2 type=exon
	MVHHTI
	>rna-XR_002659848.1_31 [2783 - 2809] gene-LOC106407493 name=LOC106407493 seq_id=NC_027773.2 type=exon
	MSIALFDCK
	>rna-XR_002659848.1_32 [2904 - 2978] gene-LOC106407493 name=LOC106407493 seq_id=NC_027773.2 type=exon
	MRSISSGEMITQIYINFKVGSVATR
	>rna-XR_002659848.1_33 [2990 - 3007] gene-LOC106407493 name=LOC106407493 seq_id=NC_027773.2 type=exon
	MVLWKY
	>rna-XR_002659848.1_34 [2983 - 3093] gene-LOC106407493 name=LOC106407493 seq_id=NC_027773.2 type=exon
	MIDGTMEVLAKISRVFNLLIVEKHHLSLIPFCIMCAF
Moderate infection level	>rna-XR_001273710.2_1 [15 - 113] gene-LOC106366705 name=LOC106366705 seq_id=NW_019168592.1 type=exon
	MFDYDYKLRHLSSLFFPCNVLVSPPPQNPTSDN
	>rna-XR_001273710.2_2 [70 - 129] gene-LOC106366705 name=LOC106366705 seq_id=NW_019168592.1 type=exon
	MFWSLLLLKTQLLITKIFIG
	>rna-XR_001273710.2_3 [215 - 238] gene-LOC106366705 name=LOC106366705 seq_id=NW_019168592.1 type=exon
	MDLFLCWF
	>rna-XR_001273710.2_4 [229 - 246] gene-LOC106366705 name=LOC106366705 seq_id=NW_019168592.1 type=exon
	MLVLRG
	>rna-XR_001273710.2_5 [327 - 395] gene-LOC106366705 name=LOC106366705 seq_id=NW_019168592.1 type=exon
	MYPGPAEAQVQGGVDPGSKFFFS
	>rna-XR_001273710.2_6 [319 - 399] gene-LOC106366705 name=LOC106366705 seq_id=NW_019168592.1 type=exon
	MYQCIQGRLRRRYKGAWTQGPNFFFHN
	>rna-XR_001273710.2_7 [410 - 439] gene-LOC106366705 name=LOC106366705 seq_id=NW_019168592.1 type=exon
	MELDFQKKKI
	>rna-XR_001273710.2_8 [530 - 559] gene-LOC106366705 name=LOC106366705 seq_id=NW_019168592.1 type=exon
	MSWPWMYLSN
	>rna-XR_001273710.2_9 [582 - 629] gene-LOC106366705 name=LOC106366705 seq_id=NW_019168592.1 type=exon
	MCFLLFFMDACMYVCV
	>rna-XR_001273710.2_10 [611 - 637] gene-LOC106366705 name=LOC106366705 seq_id=NW_019168592.1 type=exon
	MHVCVCISV
	>rna-XR_001273710.2_11 [607 - 690] gene-LOC106366705 name=LOC106366705 seq_id=NW_019168592.1 type=exon
	MHACMCVYKCIDSGTRSSCGFIHSNHQQ
	>rna-XR_001273710.2_12 [690 - 794] gene-LOC106366705 name=LOC106366705 seq_id=NW_019168592.1 type=exon
	MNLSFLRKTIPAVDFYDFPLLSLEGYKYAGGRTCQ
	>rna-XR_001273710.2_13 [788 - 817] gene-LOC106366705 name=LOC106366705 seq_id=NW_019168592.1 type=exon
	MSIISPKKTF
	>rna-XR_001273710.2_14 [850 - 879] gene-LOC106366705 name=LOC106366705 seq_id=NW_019168592.1 type=exon
	MATSRIILNN
	>rna-XR_001273710.2_15 [990 - 1103] gene-LOC106366705 name=LOC106366705 seq_id=NW_019168592.1 type=exon
	MRYLLSTAMLVYQSIQLVNLKFVTKVNNLLSFFAVCIL
	>rna-XR_001273710.2_16 [1116 - 1145] gene-LOC106366705 name=LOC106366705 seq_id=NW_019168592.1 type=exon
	MKGYDQLIQF
	>rna-XR_001273710.2_17 [1126 - 1161] gene-LOC106366705 name=LOC106366705 seq_id=NW_019168592.1 type=exon
	MINSFSFDYNVY
	>rna-XR_001273710.2_18 [1236 - 1274] gene-LOC106366705 name=LOC106366705 seq_id=NW_019168592.1 type=exon
	MPARLWEEKTQKK
	>rna-XR_001273710.2_19 [1154 - 1339] gene-LOC106366705 name=LOC106366705 seq_id=NW_019168592.1 type=exon
	MYIKNFSAFQQKLTMEDQNKPFTTTRGHAGQIVGRKNSEKVRMRKKKGSLVTGTFQNQIF
	QK
	>rna-XR_001273710.2_20 [1393 - 1443] gene-LOC106366705 name=LOC106366705 seq_id=NW_019168592.1 type=exon
	MFQSLAKDGTIQVMKKS
	>rna-XR_001273710.2_21 [1503 - 1556] gene-LOC106366705 name=LOC106366705 seq_id=NW_019168592.1 type=exon
	MRGIFKTSLITYFRLTLL
	>rna-XR_001273710.2_22 [1561 - 1578] gene-LOC106366705 name=LOC106366705 seq_id=NW_019168592.1 type=exon
	MILAIV
	>rna-XR_001273710.2_23 [1585 - 1653] gene-LOC106366705 name=LOC106366705 seq_id=NW_019168592.1 type=exon
	MLQITDHVEIEIKVMIIVYESQR
	>rna-XR_001273710.2_24 [1713 - 1751] gene-LOC106366705 name=LOC106366705 seq_id=NW_019168592.1 type=exon
	MANTTSLFLDSAH
	>rna-XR_001273710.2_25 [1754 - 1786] gene-LOC106366705 name=LOC106366705 seq_id=NW_019168592.1 type=exon
	MYVWVIAKLPV
	>rna-XR_001273710.2_26 [1814 - 1846] gene-LOC106366705 name=LOC106366705 seq_id=NW_019168592.1 type=exon
	MFSHLKQMNSI
	>rna-XR_001273710.2_27 [1898 - 1918] gene-LOC106366705 name=LOC106366705 seq_id=NW_019168592.1 type=exon
	MLLNLRI
	>rna-XR_001273710.2_28 [1950 - 1976] gene-LOC106366705 name=LOC106366705 seq_id=NW_019168592.1 type=exon
	MFGKKQNFL
	>rna-XR_001273707.2_1 [14 - 112] gene-LOC106366705 name=LOC106366705 seq_id=NW_019168592.1 type=exon
	MFDYDYKLRHLSSLFFPCNVLVSPPPQNPTSDN
	>rna-XR_001273707.2_2 [69 - 128] gene-LOC106366705 name=LOC106366705 seq_id=NW_019168592.1 type=exon
	MFWSLLLLKTQLLITKIFIG
	>rna-XR_001273707.2_3 [214 - 237] gene-LOC106366705 name=LOC106366705 seq_id=NW_019168592.1 type=exon
	MDLFLCWF
	>rna-XR_001273707.2_4 [228 - 245] gene-LOC106366705 name=LOC106366705 seq_id=NW_019168592.1 type=exon
	MLVLRG
	>rna-XR_001273707.2_5 [326 - 394] gene-LOC106366705 name=LOC106366705 seq_id=NW_019168592.1 type=exon
	MYPGPAEAQVQGGVDPGSKFFFS
	>rna-XR_001273707.2_6 [318 - 398] gene-LOC106366705 name=LOC106366705 seq_id=NW_019168592.1 type=exon
	MYQCIQGRLRRRYKGAWTQGPNFFFHN
	>rna-XR_001273707.2_7 [409 - 438] gene-LOC106366705 name=LOC106366705 seq_id=NW_019168592.1 type=exon
	MELDFQKKKI
	>rna-XR_001273707.2_8 [529 - 558] gene-LOC106366705 name=LOC106366705 seq_id=NW_019168592.1 type=exon
	MSWPWMYLSN
	>rna-XR_001273707.2_9 [581 - 628] gene-LOC106366705 name=LOC106366705 seq_id=NW_019168592.1 type=exon
	MCFLLFFMDACMYVCV
	>rna-XR_001273707.2_10 [610 - 636] gene-LOC106366705 name=LOC106366705 seq_id=NW_019168592.1 type=exon
	MHVCVCISV
	>rna-XR_001273707.2_11 [606 - 689] gene-LOC106366705 name=LOC106366705 seq_id=NW_019168592.1 type=exon
	MHACMCVYKCIDSGTRSSCGFIHSNHQQ
	>rna-XR_001273707.2_12 [762 - 794] gene-LOC106366705 name=LOC106366705 seq_id=NW_019168592.1 type=exon
	MPHHQLEGGKC
	>rna-XR_001273707.2_13 [689 - 868] gene-LOC106366705 name=LOC106366705 seq_id=NW_019168592.1 type=exon
	MNLSFLRKTIPAVDFYDFPLLSLENATSSVRRGQMLTRQFLYLKTQMFRLFENFLMGQLL
	>rna-XR_001273707.2_14 [913 - 984] gene-LOC106366705 name=LOC106366705 seq_id=NW_019168592.1 type=exon
	MFDHFVNDGLLGEFNYNEKPIYVL
	>rna-XR_001273707.2_15 [1112 - 1180] gene-LOC106366705 name=LOC106366705 seq_id=NW_019168592.1 type=exon
	MIAITTIKPLSPLLRIDFIIHPW
	>rna-XR_001273707.2_16 [1232 - 1261] gene-LOC106366705 name=LOC106366705 seq_id=NW_019168592.1 type=exon
	MSIISPKKTF
	>rna-XR_001273707.2_17 [1177 - 1269] gene-LOC106366705 name=LOC106366705 seq_id=NW_019168592.1 type=exon
	MVTPECLKPRVINTLEAGHVNNLSQKNILNF
	>rna-XR_001273707.2_18 [1294 - 1323] gene-LOC106366705 name=LOC106366705 seq_id=NW_019168592.1 type=exon
	MATSRIILNN
	>rna-XR_001273707.2_19 [1434 - 1547] gene-LOC106366705 name=LOC106366705 seq_id=NW_019168592.1 type=exon
	MRYLLSTAMLVYQSIQLVNLKFVTKVNNLLSFFAVCIL
	>rna-XR_001273707.2_20 [1560 - 1589] gene-LOC106366705 name=LOC106366705 seq_id=NW_019168592.1 type=exon
	MKGYDQLIQF
	>rna-XR_001273707.2_21 [1570 - 1605] gene-LOC106366705 name=LOC106366705 seq_id=NW_019168592.1 type=exon
	MINSFSFDYNVY
	>rna-XR_001273707.2_22 [1680 - 1718] gene-LOC106366705 name=LOC106366705 seq_id=NW_019168592.1 type=exon
	MPARLWEEKTQKK
	>rna-XR_001273707.2_23 [1598 - 1783] gene-LOC106366705 name=LOC106366705 seq_id=NW_019168592.1 type=exon
	MYIKNFSAFQQKLTMEDQNKPFTTTRGHAGQIVGRKNSEKVRMRKKKGSLVTGTFQNQIF
	QK
	>rna-XR_001273707.2_24 [1837 - 1887] gene-LOC106366705 name=LOC106366705 seq_id=NW_019168592.1 type=exon
	MFQSLAKDGTIQVMKKS
	>rna-XR_001273707.2_25 [1947 - 2000] gene-LOC106366705 name=LOC106366705 seq_id=NW_019168592.1 type=exon
	MRGIFKTSLITYFRLTLL
	>rna-XR_001273707.2_26 [2005 - 2022] gene-LOC106366705 name=LOC106366705 seq_id=NW_019168592.1 type=exon
	MILAIV
	>rna-XR_001273707.2_27 [2029 - 2097] gene-LOC106366705 name=LOC106366705 seq_id=NW_019168592.1 type=exon
	MLQITDHVEIEIKVMIIVYESQR
	>rna-XR_001273707.2_28 [2157 - 2195] gene-LOC106366705 name=LOC106366705 seq_id=NW_019168592.1 type=exon
	MANTTSLFLDSAH
	>rna-XR_001273707.2_29 [2198 - 2230] gene-LOC106366705 name=LOC106366705 seq_id=NW_019168592.1 type=exon
	MYVWVIAKLPV
	>rna-XR_001273707.2_30 [2258 - 2290] gene-LOC106366705 name=LOC106366705 seq_id=NW_019168592.1 type=exon
	MFSHLKQMNSI
	>rna-XR_001273707.2_31 [2342 - 2362] gene-LOC106366705 name=LOC106366705 seq_id=NW_019168592.1 type=exon
	MLLNLRI
	>rna-XR_001273707.2_32 [2394 - 2420] gene-LOC106366705 name=LOC106366705 seq_id=NW_019168592.1 type=exon
	MFGKKQNFL
	>rna-XR_001273708.2_1 [13 - 111] gene-LOC106366705 name=LOC106366705 seq_id=NW_019168592.1 type=exon
	MFDYDYKLRHLSSLFFPCNVLVSPPPQNPTSDN
	>rna-XR_001273708.2_2 [68 - 127] gene-LOC106366705 name=LOC106366705 seq_id=NW_019168592.1 type=exon
	MFWSLLLLKTQLLITKIFIG
	>rna-XR_001273708.2_3 [213 - 236] gene-LOC106366705 name=LOC106366705 seq_id=NW_019168592.1 type=exon
	MDLFLCWF
	>rna-XR_001273708.2_4 [227 - 244] gene-LOC106366705 name=LOC106366705 seq_id=NW_019168592.1 type=exon
	MLVLRG
	>rna-XR_001273708.2_5 [325 - 393] gene-LOC106366705 name=LOC106366705 seq_id=NW_019168592.1 type=exon
	MYPGPAEAQVQGGVDPGSKFFFS
	>rna-XR_001273708.2_6 [317 - 397] gene-LOC106366705 name=LOC106366705 seq_id=NW_019168592.1 type=exon
	MYQCIQGRLRRRYKGAWTQGPNFFFHN
	>rna-XR_001273708.2_7 [408 - 437] gene-LOC106366705 name=LOC106366705 seq_id=NW_019168592.1 type=exon
	MELDFQKKKI
	>rna-XR_001273708.2_8 [528 - 557] gene-LOC106366705 name=LOC106366705 seq_id=NW_019168592.1 type=exon
	MSWPWMYLSN
	>rna-XR_001273708.2_9 [580 - 627] gene-LOC106366705 name=LOC106366705 seq_id=NW_019168592.1 type=exon
	MCFLLFFMDACMYVCV
	>rna-XR_001273708.2_10 [609 - 635] gene-LOC106366705 name=LOC106366705 seq_id=NW_019168592.1 type=exon
	MHVCVCISV
	>rna-XR_001273708.2_11 [605 - 688] gene-LOC106366705 name=LOC106366705 seq_id=NW_019168592.1 type=exon
	MHACMCVYKCIDSGTRSSCGFIHSNHQQ
	>rna-XR_001273708.2_12 [761 - 793] gene-LOC106366705 name=LOC106366705 seq_id=NW_019168592.1 type=exon
	MPHHQLEGGKC
	>rna-XR_001273708.2_13 [688 - 867] gene-LOC106366705 name=LOC106366705 seq_id=NW_019168592.1 type=exon
	MNLSFLRKTIPAVDFYDFPLLSLENATSSVRRGQMLTRQFLYLKTQMFRLFENFLMGQLL
	>rna-XR_001273708.2_14 [912 - 983] gene-LOC106366705 name=LOC106366705 seq_id=NW_019168592.1 type=exon
	MFDHFVNDGLLGEFNYNEKPIYVL
	>rna-XR_001273708.2_15 [1111 - 1179] gene-LOC106366705 name=LOC106366705 seq_id=NW_019168592.1 type=exon
	MIAITTIKPLSPLLRIDFIIHPW
	>rna-XR_001273708.2_16 [1231 - 1260] gene-LOC106366705 name=LOC106366705 seq_id=NW_019168592.1 type=exon
	MSIISPKKTF
	>rna-XR_001273708.2_17 [1176 - 1268] gene-LOC106366705 name=LOC106366705 seq_id=NW_019168592.1 type=exon
	MVTPECLKPRVINTLEAGHVNNLSQKNILNF
	>rna-XR_001273708.2_18 [1293 - 1322] gene-LOC106366705 name=LOC106366705 seq_id=NW_019168592.1 type=exon
	MATSRIILNN
	>rna-XR_001273708.2_19 [1490 - 1528] gene-LOC106366705 name=LOC106366705 seq_id=NW_019168592.1 type=exon
	MPARLWEEKTQKK
	>rna-XR_001273708.2_20 [1450 - 1593] gene-LOC106366705 name=LOC106366705 seq_id=NW_019168592.1 type=exon
	MEDQNKPFTTTRGHAGQIVGRKNSEKVRMRKKKGSLVTGTFQNQIFQK
	>rna-XR_001273708.2_21 [1647 - 1697] gene-LOC106366705 name=LOC106366705 seq_id=NW_019168592.1 type=exon
	MFQSLAKDGTIQVMKKS
	>rna-XR_001273708.2_22 [1757 - 1810] gene-LOC106366705 name=LOC106366705 seq_id=NW_019168592.1 type=exon
	MRGIFKTSLITYFRLTLL
	>rna-XR_001273708.2_23 [1815 - 1832] gene-LOC106366705 name=LOC106366705 seq_id=NW_019168592.1 type=exon
	MILAIV
	>rna-XR_001273708.2_24 [1839 - 1907] gene-LOC106366705 name=LOC106366705 seq_id=NW_019168592.1 type=exon
	MLQITDHVEIEIKVMIIVYESQR
	>rna-XR_001273708.2_25 [1967 - 2005] gene-LOC106366705 name=LOC106366705 seq_id=NW_019168592.1 type=exon
	MANTTSLFLDSAH
	>rna-XR_001273708.2_26 [2008 - 2040] gene-LOC106366705 name=LOC106366705 seq_id=NW_019168592.1 type=exon
	MYVWVIAKLPV
	>rna-XR_001273708.2_27 [2068 - 2100] gene-LOC106366705 name=LOC106366705 seq_id=NW_019168592.1 type=exon
	MFSHLKQMNSI
	>rna-XR_001273708.2_28 [2152 - 2172] gene-LOC106366705 name=LOC106366705 seq_id=NW_019168592.1 type=exon
	MLLNLRI
	>rna-XR_001273708.2_29 [2204 - 2230] gene-LOC106366705 name=LOC106366705 seq_id=NW_019168592.1 type=exon
	MFGKKQNFL
	>rna-XR_002658214.1_1 [243 - 296] gene-LOC111205685 name=LOC111205685 seq_id=NC_027758.2 type=exon
	MFIMFPLKPTHKPSNIHI
	>rna-XR_002658214.1_2 [377 - 400] gene-LOC111205685 name=LOC111205685 seq_id=NC_027758.2 type=exon
	MKSIASGV
	>rna-XR_002658214.1_3 [415 - 438] gene-LOC111205685 name=LOC111205685 seq_id=NC_027758.2 type=exon
	MTKAFLDI
	>rna-XR_002658214.1_4 [465 - 506] gene-LOC111205685 name=LOC111205685 seq_id=NC_027758.2 type=exon
	MSIKFLVYVYMNYV
	>rna-XR_002658214.1_5 [502 - 549] gene-LOC111205685 name=LOC111205685 seq_id=NC_027758.2 type=exon
	MFRNFCFFSYASSLFS
	>rna-XR_002658214.1_6 [530 - 595] gene-LOC111205685 name=LOC111205685 seq_id=NC_027758.2 type=exon
	MHLHYFLSVLYLLMFYLVLSRY
	>rna-XR_002658214.1_7 [676 - 708] gene-LOC111205685 name=LOC111205685 seq_id=NC_027758.2 type=exon
	MLKNIGVSIYQ
	>rna-XR_002658214.1_8 [770 - 853] gene-LOC111205685 name=LOC111205685 seq_id=NC_027758.2 type=exon
	MLSRSNCSISLFTLTKSCNDSFARCVHG
	>rna-XR_002658214.1_9 [825 - 887] gene-LOC111205685 name=LOC111205685 seq_id=NC_027758.2 type=exon
	MIALQGVYMDRTCQLSKRVKL
	>rna-XR_002658214.1_10 [963 - 1016] gene-LOC111205685 name=LOC111205685 seq_id=NC_027758.2 type=exon
	MLSFLVQQKNIEQHISLH
	>rna-XR_002658214.1_11 [1067 - 1099] gene-LOC111205685 name=LOC111205685 seq_id=NC_027758.2 type=exon
	MHLFLSDLSNF
	>rna-XR_002658214.1_12 [1190 - 1210] gene-LOC111205685 name=LOC111205685 seq_id=NC_027758.2 type=exon
	MFYFWMT
	>rna-XR_002658214.1_13 [1150 - 1233] gene-LOC111205685 name=LOC111205685 seq_id=NC_027758.2 type=exon
	MFQSISNFVNIRINVLLLDDVNKNLFTL
	>rna-XR_002658214.1_14 [1245 - 1280] gene-LOC111205685 name=LOC111205685 seq_id=NC_027758.2 type=exon
	MITDRFMGCKMN
	>rna-XR_002658214.1_15 [1340 - 1468] gene-LOC111205685 name=LOC111205685 seq_id=NC_027758.2 type=exon
	MLLQLLMFLTTASSSLHSSICFLMYVTVRGWDCSWRATILGRS
	>rna-XR_002658214.1_16 [1471 - 1518] gene-LOC111205685 name=LOC111205685 seq_id=NC_027758.2 type=exon
	MISSQWRLYFTSMYSL
	>rna-XR_002658214.1_17 [1413 - 1550] gene-LOC111205685 name=LOC111205685 seq_id=NC_027758.2 type=exon
	MSLSEAGIALGELQSLVDLNDFISVATIFHIDVLSVTPTLISQKKA
	>rna-XR_002658214.1_18 [1602 - 1646] gene-LOC111205685 name=LOC111205685 seq_id=NC_027758.2 type=exon
	MMIMMMMKKACVYII
	>rna-XR_002658214.1_19 [1651 - 1695] gene-LOC111205685 name=LOC111205685 seq_id=NC_027758.2 type=exon
	MLRPISKPNMFSTCL
	>rna-XR_002658214.1_20 [1689 - 1712] gene-LOC111205685 name=LOC111205685 seq_id=NC_027758.2 type=exon
	MFVTQKYT
	>rna-XR_002660319.1_1 [79 - 132] gene-LOC111208321 name=LOC111208321 seq_id=NC_027757.2 type=exon
	MKLQKHFFFYWNQDRTTI
	>rna-XR_002660319.1_2 [143 - 184] gene-LOC111208321 name=LOC111208321 seq_id=NC_027757.2 type=exon
	MIHIWKSGIHHTYI
	>rna-XR_002660319.1_3 [184 - 222] gene-LOC111208321 name=LOC111208321 seq_id=NC_027757.2 type=exon
	MIRSHAWLPVCHK
	>rna-XR_002660319.1_4 [197 - 253] gene-LOC111208321 name=LOC111208321 seq_id=NC_027757.2 type=exon
	MPGSLYATSKYRSHYEIGH
	>rna-XR_002660319.1_5 [213 - 278] gene-LOC111208321 name=LOC111208321 seq_id=NC_027757.2 type=exon
	MPQVNTDLIMKSDTSGVQSSQA
	>rna-XR_002660319.1_6 [301 - 318] gene-LOC111208321 name=LOC111208321 seq_id=NC_027757.2 type=exon
	MSTLFL
	>rna-XR_002660319.1_7 [342 - 386] gene-LOC111208321 name=LOC111208321 seq_id=NC_027757.2 type=exon
	MVASYKIYVICMDYV
	>rna-XR_002660319.1_8 [334 - 420] gene-LOC111208321 name=LOC111208321 seq_id=NC_027757.2 type=exon
	MCGWWLAIRYMLYAWIMSRTVIWYSISLF
	>rna-XR_002660319.1_9 [371 - 430] gene-LOC111208321 name=LOC111208321 seq_id=NC_027757.2 type=exon
	MHGLCLELLYGTQFHYFEIL
	>rna-XR_002660319.1_10 [399 - 494] gene-LOC111208321 name=LOC111208321 seq_id=NC_027757.2 type=exon
	MVLNFTILRSFNLVRPYLTLSLYSFINKETLL
	>rna-XR_002660319.1_11 [525 - 554] gene-LOC111208321 name=LOC111208321 seq_id=NC_027757.2 type=exon
	MVNVIYFRET
	>rna-XR_002660319.1_12 [532 - 681] gene-LOC111208321 name=LOC111208321 seq_id=NC_027757.2 type=exon
	MLSILEKHREKYRSELHIYIYIYIYILRCHSSLTMHGVIHVLLRCYEFVI
	>rna-XR_002660319.1_13 [615 - 692] gene-LOC111208321 name=LOC111208321 seq_id=NC_027757.2 type=exon
	MSFIFNYARRNSCIAKMLRVCNLKKC
	>rna-XR_002660319.1_14 [689 - 706] gene-LOC111208321 name=LOC111208321 seq_id=NC_027757.2 type=exon
	MLIHIV
	>rna-XR_002660319.1_15 [761 - 784] gene-LOC111208321 name=LOC111208321 seq_id=NC_027757.2 type=exon
	MYPHQFWI
	>rna-XR_002660319.1_16 [748 - 903] gene-LOC111208321 name=LOC111208321 seq_id=NC_027757.2 type=exon
	MAIWYVSTSVLDLILSFLELNYHYLVSMDLDFGPSDLHGGRGITDDWSTPWY
	>rna-XR_002660319.1_17 [881 - 955] gene-LOC111208321 name=LOC111208321 seq_id=NC_027757.2 type=exon
	MIGPLLGISRKVFQTRDRQYDTLSN
	>rna-XR_002660319.1_18 [939 - 1010] gene-LOC111208321 name=LOC111208321 seq_id=NC_027757.2 type=exon
	MIRFRTSPLCSTKCVLFRTDRISR
	>rna-XR_002660319.1_19 [1251 - 1298] gene-LOC111208321 name=LOC111208321 seq_id=NC_027757.2 type=exon
	MLCVVCRMFLVTEKLL
	>rna-XR_002660319.1_20 [1256 - 1363] gene-LOC111208321 name=LOC111208321 seq_id=NC_027757.2 type=exon
	MRCMQDVSCDRKTTVKHKTFVSPFHAFAPPKIPKFV
	>rna-XR_002660319.1_21 [1329 - 1400] gene-LOC111208321 name=LOC111208321 seq_id=NC_027757.2 type=exon
	MHLPLPKFPSLFKFVVFFPQNHRH
	>rna-XR_002660319.1_22 [1489 - 1518] gene-LOC111208321 name=LOC111208321 seq_id=NC_027757.2 type=exon
	MDQHRQIYDN
	>rna-XR_002660319.1_23 [1511 - 1534] gene-LOC111208321 name=LOC111208321 seq_id=NC_027757.2 type=exon
	MITSDNLI
	>rna-XR_002660886.1_1 [124 - 177] gene-LOC111209134 name=LOC111209134 seq_id=NC_027774.2 type=exon
	MFIMFPLQPTHKPSNIHI
	>rna-XR_002660886.1_2 [264 - 287] gene-LOC111209134 name=LOC111209134 seq_id=NC_027774.2 type=exon
	MKSIASGV
	>rna-XR_002660886.1_3 [302 - 325] gene-LOC111209134 name=LOC111209134 seq_id=NC_027774.2 type=exon
	MTKAFLDI
	>rna-XR_002660886.1_4 [352 - 393] gene-LOC111209134 name=LOC111209134 seq_id=NC_027774.2 type=exon
	MSIKFLVYVCMNYV
	>rna-XR_002660886.1_5 [378 - 452] gene-LOC111209134 name=LOC111209134 seq_id=NC_027774.2 type=exon
	MHELCLEISVFFICIFIIFLASFIY
	>rna-XR_002660886.1_6 [389 - 481] gene-LOC111209134 name=LOC111209134 seq_id=NC_027774.2 type=exon
	MFRNFCFFHMHLHYFLSVLYLLMSYLVLSRY
	>rna-XR_002660886.1_7 [507 - 524] gene-LOC111209134 name=LOC111209134 seq_id=NC_027774.2 type=exon
	MNVMKS
	>rna-XR_002660886.1_8 [565 - 597] gene-LOC111209134 name=LOC111209134 seq_id=NC_027774.2 type=exon
	MLKNIGVSIYQ
	>rna-XR_002660886.1_9 [712 - 768] gene-LOC111209134 name=LOC111209134 seq_id=NC_027774.2 type=exon
	MIALQGGYMDKLCQLSKRV
	>rna-XR_002660886.1_10 [807 - 881] gene-LOC111209134 name=LOC111209134 seq_id=NC_027774.2 type=exon
	MSLFCLVGLKDNASVCCLFLCNKRI
	>rna-XR_002660886.1_11 [851 - 940] gene-LOC111209134 name=LOC111209134 seq_id=NC_027774.2 type=exon
	MLSFLVQQKNIEQHICLHQWRSHIEQGGGH
	>rna-XR_002660886.1_12 [1026 - 1070] gene-LOC111209134 name=LOC111209134 seq_id=NC_027774.2 type=exon
	MPPTILFSASATGLH
	>rna-XR_002660886.1_13 [1122 - 1154] gene-LOC111209134 name=LOC111209134 seq_id=NC_027774.2 type=exon
	MHLFLSDLSNF
	>rna-XR_002660886.1_14 [1245 - 1265] gene-LOC111209134 name=LOC111209134 seq_id=NC_027774.2 type=exon
	MFYFWMT
	>rna-XR_002660886.1_15 [1205 - 1288] gene-LOC111209134 name=LOC111209134 seq_id=NC_027774.2 type=exon
	MFQSISNFVNIRINVLLLDDVNKNLFRL
	>rna-XR_002660886.1_16 [1318 - 1353] gene-LOC111209134 name=LOC111209134 seq_id=NC_027774.2 type=exon
	MITDRFMGGKMN
	>rna-XR_002660886.1_17 [1546 - 1593] gene-LOC111209134 name=LOC111209134 seq_id=NC_027774.2 type=exon
	MISSQWRLYFSSMYSM
	>rna-XR_002660886.1_18 [1413 - 1625] gene-LOC111209134 name=LOC111209134 seq_id=NC_027774.2 type=exon
	MLLQLLMFLTTSSSSLHSSICFLLCMSLSEAGIALGELQSLVDLYDFISMATIFLIDVLY
	VTPTLISKKKA
	>rna-XR_002660886.1_19 [1676 - 1720] gene-LOC111209134 name=LOC111209134 seq_id=NC_027774.2 type=exon
	MMIMMMMKKACVYII
	>rna-XR_002660886.1_20 [1725 - 1769] gene-LOC111209134 name=LOC111209134 seq_id=NC_027774.2 type=exon
	MLRPISKPNMFSTCL
	>rna-XR_002660886.1_21 [1763 - 1786] gene-LOC111209134 name=LOC111209134 seq_id=NC_027774.2 type=exon
	MFVTQKYT
	>rna-XR_001272838.2_1 [198 - 323] gene-LOC106360797 name=LOC106360797 seq_id=NC_027774.2 type=exon
	MRSIWIHPLVASILVKVFHCRGLHRRENLQWVDPCLLVSAGN
	>rna-XR_001272838.2_2 [299 - 346] gene-LOC106360797 name=LOC106360797 seq_id=NC_027774.2 type=exon
	MPLGQRRELANLVQNS
	>rna-XR_001272838.2_3 [353 - 385] gene-LOC106360797 name=LOC106360797 seq_id=NC_027774.2 type=exon
	MGTQKLVIFLL
	>rna-XR_001272838.2_4 [428 - 445] gene-LOC106360797 name=LOC106360797 seq_id=NC_027774.2 type=exon
	MLQRPQ
	>rna-XR_001272838.2_5 [542 - 565] gene-LOC106360797 name=LOC106360797 seq_id=NC_027774.2 type=exon
	MLKDKHLQ
	>rna-XR_001272838.2_6 [569 - 586] gene-LOC106360797 name=LOC106360797 seq_id=NC_027774.2 type=exon
	MFSHTH
	>rna-XR_001272838.2_7 [591 - 608] gene-LOC106360797 name=LOC106360797 seq_id=NC_027774.2 type=exon
	MCQFHN
	>rna-XR_001278112.2_1 [10 - 78] gene-LOC106389769 name=LOC106389769 seq_id=NC_027774.2 type=exon
	MKLYKLKCSVQFNASPDICSLCM
	>rna-XR_001278112.2_2 [47 - 118] gene-LOC106389769 name=LOC106389769 seq_id=NC_027774.2 type=exon
	MPRQTSVPFACKRDKESDKSHKER
	>rna-XR_001278112.2_3 [30 - 128] gene-LOC106389769 name=LOC106389769 seq_id=NC_027774.2 type=exon
	MFCSIQCLARHLFPLHVREIKKATKAIKKDKTL
	>rna-XR_001278112.2_4 [217 - 342] gene-LOC106389769 name=LOC106389769 seq_id=NC_027774.2 type=exon
	MFVLDLDKKTLDLIFQRVSEFLPFVQICILSLCGSLPSLVKT
	>rna-XR_001278112.2_5 [382 - 408] gene-LOC106389769 name=LOC106389769 seq_id=NC_027774.2 type=exon
	MTLILRFIL
	>rna-XR_001278112.2_6 [441 - 650] gene-LOC106389769 name=LOC106389769 seq_id=NC_027774.2 type=exon
	MSWGKRNTQKLTEESEHTKVICICCICDLLRAHCSFCQIPVLISLACPCSLCLSLSLSHT
	QALSLSLSLS
	>rna-XR_001278112.2_7 [509 - 691] gene-LOC106389769 name=LOC106389769 seq_id=NC_027774.2 type=exon
	MLYLRSLACSLLFLSDSGADLFGLSLFSLSQSLSLTYTSSFSLSLSLLIISKLRYGSTES
	T
	>rna-XR_001278112.2_8 [672 - 695] gene-LOC106389769 name=LOC106389769 seq_id=NC_027774.2 type=exon
	MEVRRVRD
	>rna-XR_001278112.2_9 [730 - 750] gene-LOC106389769 name=LOC106389769 seq_id=NC_027774.2 type=exon
	MTMLMVC
	>rna-XR_001278112.2_10 [774 - 809] gene-LOC106389769 name=LOC106389769 seq_id=NC_027774.2 type=exon
	MSGPSSIYYLWL
	>rna-XR_001278112.2_11 [809 - 853] gene-LOC106389769 name=LOC106389769 seq_id=NC_027774.2 type=exon
	MICLGALKEKISRWK
	>rna-XR_001278112.2_12 [912 - 956] gene-LOC106389769 name=LOC106389769 seq_id=NC_027774.2 type=exon
	MLMMFCVMNIGFADN
	>rna-XR_001278112.2_13 [962 - 982] gene-LOC106389769 name=LOC106389769 seq_id=NC_027774.2 type=exon
	MRYWKPN
	>rna-XR_001278112.2_14 [1076 - 1114] gene-LOC106389769 name=LOC106389769 seq_id=NC_027774.2 type=exon
	MYSCAFLQLQVDV
	>rna-XR_001278112.2_15 [1110 - 1199] gene-LOC106389769 name=LOC106389769 seq_id=NC_027774.2 type=exon
	MFSIYRNILSAEFPSRPIYIFRIHVKLNNI
	>rna-XR_001278112.2_16 [1199 - 1216] gene-LOC106389769 name=LOC106389769 seq_id=NC_027774.2 type=exon
	MNKLSL
	>rna-XR_001282809.2_1 [113 - 166] gene-LOC106414208 name=LOC106414208 seq_id=NC_027774.2 type=exon
	MIFTASDENRMRRVLVVM
	>rna-XR_001282809.2_2 [278 - 385] gene-LOC106414208 name=LOC106414208 seq_id=NC_027774.2 type=exon
	MVINLKSILSIILKSDRAQGTQVQDDSMTSLASSVI
	>rna-XR_001282809.2_3 [458 - 478] gene-LOC106414208 name=LOC106414208 seq_id=NC_027774.2 type=exon
	MLQSTRV
	>rna-XR_001282809.2_4 [562 - 615] gene-LOC106414208 name=LOC106414208 seq_id=NC_027774.2 type=exon
	MESYRIYLKNILLFVCLA
	>rna-XR_001282809.2_5 [655 - 708] gene-LOC106414208 name=LOC106414208 seq_id=NC_027774.2 type=exon
	MISIYTFQLTSKNNCCLL
	>rna-XR_002664208.1_1 [63 - 83] gene-LOC111215065 name=LOC111215065 seq_id=NC_027760.2 type=exon
	MFCPLCM
	>rna-XR_002664208.1_2 [152 - 175] gene-LOC111215065 name=LOC111215065 seq_id=NC_027760.2 type=exon
	MSWDKRKT
	>rna-XR_002664208.1_3 [34 - 195] gene-LOC111215065 name=LOC111215065 seq_id=NC_027760.2 type=exon
	MKRNSIYQLKCSVPFACKRDKQTDKSHKERSLEMEELRVNELGQKKNIATDRRE
	>rna-XR_002664208.1_4 [386 - 466] gene-LOC111215065 name=LOC111215065 seq_id=NC_027760.2 type=exon
	MRFKRWLVPCIDLIACEVIALNFHHSL
	>rna-XR_002664208.1_5 [400 - 471] gene-LOC111215065 name=LOC111215065 seq_id=NC_027760.2 type=exon
	MACSLYRSDCMRGDSFKLSPFIIV
	>rna-XR_002664208.1_6 [478 - 498] gene-LOC111215065 name=LOC111215065 seq_id=NC_027760.2 type=exon
	MGSIEKA
	>rna-XR_002664208.1_7 [505 - 525] gene-LOC111215065 name=LOC111215065 seq_id=NC_027760.2 type=exon
	MSLRVVK
	>rna-XR_002664208.1_8 [525 - 545] gene-LOC111215065 name=LOC111215065 seq_id=NC_027760.2 type=exon
	MKLSKLT
	>rna-XR_002664208.1_9 [583 - 630] gene-LOC111215065 name=LOC111215065 seq_id=NC_027760.2 type=exon
	MYILYYHLFFPFLGAF
	>rna-XR_002664208.1_10 [789 - 830] gene-LOC111215065 name=LOC111215065 seq_id=NC_027760.2 type=exon
	MVCSYILIPRSIII
	>rna-XR_002664208.1_11 [719 - 883] gene-LOC111215065 name=LOC111215065 seq_id=NC_027760.2 type=exon
	MFQEYSGHDICIIRKSRRLLGYLNGLLVHFDSTKYNYIIIFYSLYIYQKNNYVGI
	>rna-XR_002664208.1_12 [929 - 964] gene-LOC111215065 name=LOC111215065 seq_id=NC_027760.2 type=exon
	MLHLVVCFLRLI
	>rna-XR_002664208.1_13 [983 - 1009] gene-LOC111215065 name=LOC111215065 seq_id=NC_027760.2 type=exon
	MQTKKAYSV
	>rna-XR_002664208.1_14 [1009 - 1068] gene-LOC111215065 name=LOC111215065 seq_id=NC_027760.2 type=exon
	MKLLCWFHMLMCHVFPLLYC
	>rna-XR_002664208.1_15 [1046 - 1108] gene-LOC111215065 name=LOC111215065 seq_id=NC_027760.2 type=exon
	MSFHFCTVEAVEKYCCLSTNI
	>rna-XR_002664208.1_16 [1158 - 1295] gene-LOC111215065 name=LOC111215065 seq_id=NC_027760.2 type=exon
	MSRWAETMVILIPVRIVWSDVCITSEAIFVYNAIVVMFASQMHNMF
	>rna-XR_002664208.1_17 [1354 - 1383] gene-LOC111215065 name=LOC111215065 seq_id=NC_027760.2 type=exon
	MNHIVYGFLS
	>rna-XR_002664208.1_18 [1414 - 1449] gene-LOC111215065 name=LOC111215065 seq_id=NC_027760.2 type=exon
	MLVRLCAYTCAL
	>rna-XR_002664209.1_1 [144 - 167] gene-LOC111215065 name=LOC111215065 seq_id=NC_027760.2 type=exon
	MSWDKRKT
	>rna-XR_002664209.1_2 [125 - 187] gene-LOC111215065 name=LOC111215065 seq_id=NC_027760.2 type=exon
	MEELRVNELGQKKNIATDRRE
	>rna-XR_002664209.1_3 [378 - 458] gene-LOC111215065 name=LOC111215065 seq_id=NC_027760.2 type=exon
	MRFKRWLVPCIDLIACEVIALNFHHSL
	>rna-XR_002664209.1_4 [392 - 463] gene-LOC111215065 name=LOC111215065 seq_id=NC_027760.2 type=exon
	MACSLYRSDCMRGDSFKLSPFIIV
	>rna-XR_002664209.1_5 [470 - 490] gene-LOC111215065 name=LOC111215065 seq_id=NC_027760.2 type=exon
	MGSIEKA
	>rna-XR_002664209.1_6 [497 - 517] gene-LOC111215065 name=LOC111215065 seq_id=NC_027760.2 type=exon
	MSLRVVK
	>rna-XR_002664209.1_7 [517 - 537] gene-LOC111215065 name=LOC111215065 seq_id=NC_027760.2 type=exon
	MKLSKLT
	>rna-XR_002664209.1_8 [575 - 622] gene-LOC111215065 name=LOC111215065 seq_id=NC_027760.2 type=exon
	MYILYYHLFFPFLGAF
	>rna-XR_002664209.1_9 [781 - 822] gene-LOC111215065 name=LOC111215065 seq_id=NC_027760.2 type=exon
	MVCSYILIPRSIII
	>rna-XR_002664209.1_10 [711 - 875] gene-LOC111215065 name=LOC111215065 seq_id=NC_027760.2 type=exon
	MFQEYSGHDICIIRKSRRLLGYLNGLLVHFDSTKYNYIIIFYSLYIYQKNNYVGI
	>rna-XR_002664209.1_11 [921 - 956] gene-LOC111215065 name=LOC111215065 seq_id=NC_027760.2 type=exon
	MLHLVVCFLRLI
	>rna-XR_002664209.1_12 [975 - 1001] gene-LOC111215065 name=LOC111215065 seq_id=NC_027760.2 type=exon
	MQTKKAYSV
	>rna-XR_002664209.1_13 [1001 - 1060] gene-LOC111215065 name=LOC111215065 seq_id=NC_027760.2 type=exon
	MKLLCWFHMLMCHVFPLLYC
	>rna-XR_002664209.1_14 [1038 - 1100] gene-LOC111215065 name=LOC111215065 seq_id=NC_027760.2 type=exon
	MSFHFCTVEAVEKYCCLSTNI
	>rna-XR_002664209.1_15 [1150 - 1287] gene-LOC111215065 name=LOC111215065 seq_id=NC_027760.2 type=exon
	MSRWAETMVILIPVRIVWSDVCITSEAIFVYNAIVVMFASQMHNMF
	>rna-XR_002664209.1_16 [1346 - 1375] gene-LOC111215065 name=LOC111215065 seq_id=NC_027760.2 type=exon
	MNHIVYGFLS
	>rna-XR_002664209.1_17 [1406 - 1441] gene-LOC111215065 name=LOC111215065 seq_id=NC_027760.2 type=exon
	MLVRLCAYTCAL
	>rna-XR_002664210.1_1 [21 - 59] gene-LOC111215065 name=LOC111215065 seq_id=NC_027760.2 type=exon
	MFVCFLSMVPCLL
	>rna-XR_002664210.1_2 [91 - 114] gene-LOC111215065 name=LOC111215065 seq_id=NC_027760.2 type=exon
	MSWDKRKT
	>rna-XR_002664210.1_3 [72 - 134] gene-LOC111215065 name=LOC111215065 seq_id=NC_027760.2 type=exon
	MEELRVNELGQKKNIATDRRE
	>rna-XR_002664210.1_4 [325 - 405] gene-LOC111215065 name=LOC111215065 seq_id=NC_027760.2 type=exon
	MRFKRWLVPCIDLIACEVIALNFHHSL
	>rna-XR_002664210.1_5 [339 - 410] gene-LOC111215065 name=LOC111215065 seq_id=NC_027760.2 type=exon
	MACSLYRSDCMRGDSFKLSPFIIV
	>rna-XR_002664210.1_6 [417 - 437] gene-LOC111215065 name=LOC111215065 seq_id=NC_027760.2 type=exon
	MGSIEKA
	>rna-XR_002664210.1_7 [444 - 464] gene-LOC111215065 name=LOC111215065 seq_id=NC_027760.2 type=exon
	MSLRVVK
	>rna-XR_002664210.1_8 [464 - 484] gene-LOC111215065 name=LOC111215065 seq_id=NC_027760.2 type=exon
	MKLSKLT
	>rna-XR_002664210.1_9 [522 - 569] gene-LOC111215065 name=LOC111215065 seq_id=NC_027760.2 type=exon
	MYILYYHLFFPFLGAF
	>rna-XR_002664210.1_10 [728 - 769] gene-LOC111215065 name=LOC111215065 seq_id=NC_027760.2 type=exon
	MVCSYILIPRSIII
	>rna-XR_002664210.1_11 [658 - 822] gene-LOC111215065 name=LOC111215065 seq_id=NC_027760.2 type=exon
	MFQEYSGHDICIIRKSRRLLGYLNGLLVHFDSTKYNYIIIFYSLYIYQKNNYVGI
	>rna-XR_002664210.1_12 [868 - 903] gene-LOC111215065 name=LOC111215065 seq_id=NC_027760.2 type=exon
	MLHLVVCFLRLI
	>rna-XR_002664210.1_13 [922 - 948] gene-LOC111215065 name=LOC111215065 seq_id=NC_027760.2 type=exon
	MQTKKAYSV
	>rna-XR_002664210.1_14 [948 - 1007] gene-LOC111215065 name=LOC111215065 seq_id=NC_027760.2 type=exon
	MKLLCWFHMLMCHVFPLLYC
	>rna-XR_002664210.1_15 [985 - 1047] gene-LOC111215065 name=LOC111215065 seq_id=NC_027760.2 type=exon
	MSFHFCTVEAVEKYCCLSTNI
	>rna-XR_002664210.1_16 [1097 - 1234] gene-LOC111215065 name=LOC111215065 seq_id=NC_027760.2 type=exon
	MSRWAETMVILIPVRIVWSDVCITSEAIFVYNAIVVMFASQMHNMF
	>rna-XR_002664210.1_17 [1293 - 1322] gene-LOC111215065 name=LOC111215065 seq_id=NC_027760.2 type=exon
	MNHIVYGFLS
	>rna-XR_002664210.1_18 [1353 - 1388] gene-LOC111215065 name=LOC111215065 seq_id=NC_027760.2 type=exon
	MLVRLCAYTCAL
	>rna-XR_002664297.1_1 [44 - 91] gene-LOC111215201 name=LOC111215201 seq_id=NC_027760.2 type=exon
	MSQKVNPMFLLRYLEI
	>rna-XR_002664297.1_2 [134 - 274] gene-LOC111215201 name=LOC111215201 seq_id=NC_027760.2 type=exon
	MFLVLFIFGSPLNFFIKSPFYFLILSSIITTHLSSSPSRLSLSLFLS
	>rna-XR_002664297.1_3 [346 - 435] gene-LOC111215201 name=LOC111215201 seq_id=NC_027760.2 type=exon
	MILRGKGLSLLRGMLFGSKTLAYHVRSSSI
	>rna-XR_002664297.1_4 [416 - 478] gene-LOC111215201 name=LOC111215201 seq_id=NC_027760.2 type=exon
	MLDLLRFNRIKPPCLRSDLGF
	>rna-XR_002664297.1_5 [628 - 696] gene-LOC111215201 name=LOC111215201 seq_id=NC_027760.2 type=exon
	MHDDESIVSLSVSYHTRSTRFGS
	>rna-XR_002664297.1_6 [832 - 849] gene-LOC111215201 name=LOC111215201 seq_id=NC_027760.2 type=exon
	MRRSVS
	>rna-XR_002664297.1_7 [816 - 899] gene-LOC111215201 name=LOC111215201 seq_id=NC_027760.2 type=exon
	MQILLHAKISILILDIVSPSKLPAQYIL
	>rna-XR_002653174.1_1 [101 - 139] gene-LOC111199259 name=LOC111199259 seq_id=NC_027763.2 type=exon
	MSFPFCKSKFCMV
	>rna-XR_002653174.1_2 [93 - 257] gene-LOC111199259 name=LOC111199259 seq_id=NC_027763.2 type=exon
	MYICHSLFANQNFVWFNLILLFWLYISEGVFYIPLSHLYRLGFRFFCVLVLFCSN
	>rna-XR_002653174.1_3 [350 - 406] gene-LOC111199259 name=LOC111199259 seq_id=NC_027763.2 type=exon
	MYIYIYVLYMHNYVFCTSL
	>rna-XR_002653174.1_4 [366 - 434] gene-LOC111199259 name=LOC111199259 seq_id=NC_027763.2 type=exon
	MYCICITMYFVQVSRPLGYKRGG
	>rna-XR_002653174.1_5 [641 - 769] gene-LOC111199259 name=LOC111199259 seq_id=NC_027763.2 type=exon
	MKMRILMMLHRKSTAILSLSPIYICLIYTSFEPDLLQVGLFLL
	>rna-XR_002653174.1_6 [604 - 801] gene-LOC111199259 name=LOC111199259 seq_id=NC_027763.2 type=exon
	MDGGDSPSPKFSDENENLDDAASEINGYSFPLSYIYMFNIYFIRTRSSSGRFVSALSSFL
	FVSRLW
	>rna-XR_002653174.1_7 [798 - 821] gene-LOC111199259 name=LOC111199259 seq_id=NC_027763.2 type=exon
	MVTDSPHF
	>rna-XR_002653174.1_8 [841 - 888] gene-LOC111199259 name=LOC111199259 seq_id=NC_027763.2 type=exon
	MISPRTLVGILFHLMW
	>rna-XR_002653174.1_9 [937 - 981] gene-LOC111199259 name=LOC111199259 seq_id=NC_027763.2 type=exon
	MLVTRGDSQDSLSIG
	>rna-XR_002653174.1_10 [1005 - 1031] gene-LOC111199259 name=LOC111199259 seq_id=NC_027763.2 type=exon
	MDLIKGITN
	>rna-XR_002653174.1_11 [1056 - 1073] gene-LOC111199259 name=LOC111199259 seq_id=NC_027763.2 type=exon
	MMNQII
	>rna-XR_002653174.1_12 [1207 - 1233] gene-LOC111199259 name=LOC111199259 seq_id=NC_027763.2 type=exon
	MTDCFQIKL
	>rna-XR_002653174.1_13 [1119 - 1268] gene-LOC111199259 name=LOC111199259 seq_id=NC_027763.2 type=exon
	MSKNQPWPVIIKAVHPFSASVKRVTSQTKHDRLFPNKTLNNSFCFYKLTA
	>rna-XR_002653174.1_14 [1287 - 1325] gene-LOC111199259 name=LOC111199259 seq_id=NC_027763.2 type=exon
	MEIFVSPYIHIFI
	>rna-XR_002653174.1_15 [1364 - 1405] gene-LOC111199259 name=LOC111199259 seq_id=NC_027763.2 type=exon
	MPLNNALEDLNFIQ
	>rna-XR_002653174.1_16 [1333 - 1422] gene-LOC111199259 name=LOC111199259 seq_id=NC_027763.2 type=exon
	MNYMLYRSYHYAFEQCIGGPKLHPVTTVHI
	>rna-XR_002653174.1_17 [1466 - 1489] gene-LOC111199259 name=LOC111199259 seq_id=NC_027763.2 type=exon
	MKDYFFRS
	>rna-XR_002653174.1_18 [1459 - 1539] gene-LOC111199259 name=LOC111199259 seq_id=NC_027763.2 type=exon
	MHNERLFFQIMMISNKSDNHIFFTSLF
	>rna-XR_002653174.1_19 [1559 - 1600] gene-LOC111199259 name=LOC111199259 seq_id=NC_027763.2 type=exon
	MKSNPRVFASLISH
	>rna-XR_002653174.1_20 [1646 - 1687] gene-LOC111199259 name=LOC111199259 seq_id=NC_027763.2 type=exon
	MLIFVFRVIIKVLQ
	>rna-XR_002653184.1_1 [24 - 56] gene-LOC111199262 name=LOC111199262 seq_id=NC_027763.2 type=exon
	MALEKNNIAPT
	>rna-XR_002653184.1_2 [5 - 175] gene-LOC111199262 name=LOC111199262 seq_id=NC_027763.2 type=exon
	MSIIYINGLGEKQHCSHLEREKEFFTATRERIQRDRIDPNQAELFPNNYFNFFSMER
	>rna-XR_002653184.1_3 [210 - 338] gene-LOC111199262 name=LOC111199262 seq_id=NC_027763.2 type=exon
	MRSLRIHPLVASTLVKGFLQSFEDLGHMSRKQEYEFNTTWNRH
	>rna-XR_002653184.1_4 [310 - 342] gene-LOC111199262 name=LOC111199262 seq_id=NC_027763.2 type=exon
	MSLIQRGTDTN
	>rna-XR_002653184.1_5 [425 - 469] gene-LOC111199262 name=LOC111199262 seq_id=NC_027763.2 type=exon
	MFFFCGRSIMLSENI
	>rna-XR_002653184.1_6 [469 - 540] gene-LOC111199262 name=LOC111199262 seq_id=NC_027763.2 type=exon
	MTIGRKFPCNCSMLCENLKRLPIQ
	>rna-XR_002663545.1_1 [91 - 168] gene-LOC106438439 name=LOC106438439 seq_id=NC_027759.2 type=exon
	MYAFSLSLLSPLSPSLCFRSHQVFSA
	>rna-XR_002663545.1_2 [95 - 187] gene-LOC106438439 name=LOC106438439 seq_id=NC_027759.2 type=exon
	MLSLCLSSLLSLHLSVLDLIRSSLLSMWLIW
	>rna-XR_002663545.1_3 [192 - 329] gene-LOC106438439 name=LOC106438439 seq_id=NC_027759.2 type=exon
	MYYIRHTFFFANQNLCCFVSFYCFSCIKYQVQTSECIQDFSFSSLS
	>rna-XR_002663545.1_4 [558 - 629] gene-LOC106438439 name=LOC106438439 seq_id=NC_027759.2 type=exon
	MSVLVIKFEFVRQKITYEKTVRRN
	>rna-XR_002663545.1_5 [741 - 767] gene-LOC106438439 name=LOC106438439 seq_id=NC_027759.2 type=exon
	MGILMMLHR
	>rna-XR_002663545.1_6 [698 - 811] gene-LOC106438439 name=LOC106438439 seq_id=NC_027759.2 type=exon
	MDGGGSLYPKFSCENGNLDDAASVINGYPFPLSFLLKS
	>rna-XR_002663545.1_7 [887 - 910] gene-LOC106438439 name=LOC106438439 seq_id=NC_027759.2 type=exon
	MLTYSLHI
	>rna-XR_002663545.1_8 [968 - 1030] gene-LOC106438439 name=LOC106438439 seq_id=NC_027759.2 type=exon
	MLLASFHTIYEWIHEFSSIHR
	>rna-XR_002663545.1_9 [1073 - 1138] gene-LOC106438439 name=LOC106438439 seq_id=NC_027759.2 type=exon
	MLLPISAWISPTSKYSFFNKKQ
	>rna-XR_002663545.1_10 [1144 - 1173] gene-LOC106438439 name=LOC106438439 seq_id=NC_027759.2 type=exon
	MVMILEVEII
	>rna-XR_002663545.1_11 [1187 - 1267] gene-LOC106438439 name=LOC106438439 seq_id=NC_027759.2 type=exon
	MKVLVSSKERFPRYTVNSFFFLLVGVS
	>rna-XR_002663545.1_12 [1381 - 1443] gene-LOC106438439 name=LOC106438439 seq_id=NC_027759.2 type=exon
	MFFYICKMEQNYFHFFCLFLI
	>rna-XR_002663545.1_13 [1395 - 1499] gene-LOC106438439 name=LOC106438439 seq_id=NC_027759.2 type=exon
	MQNGAKLLSFFLLIFNMIILRLPSIIFIIIHISIY
	>rna-XR_002663545.1_14 [1502 - 1573] gene-LOC106438439 name=LOC106438439 seq_id=NC_027759.2 type=exon
	MNWIQTKPIHRNEFVVFTKRKNQL
	>rna-XR_002663545.1_15 [1536 - 1613] gene-LOC106438439 name=LOC106438439 seq_id=NC_027759.2 type=exon
	MSLWFLLRGKISCRNMAYLLSKSNSK
	>rna-XR_002663545.1_16 [1661 - 1678] gene-LOC106438439 name=LOC106438439 seq_id=NC_027759.2 type=exon
	MCLVMY
	>rna-XR_002663545.1_17 [1689 - 1739] gene-LOC106438439 name=LOC106438439 seq_id=NC_027759.2 type=exon
	MEILCLPPHTFSYSKNK
	>rna-XR_002663545.1_18 [1684 - 1749] gene-LOC106438439 name=LOC106438439 seq_id=NC_027759.2 type=exon
	MSWRFCVSLRTHLVIRKINKII
	>rna-XR_002663545.1_19 [1777 - 1800] gene-LOC106438439 name=LOC106438439 seq_id=NC_027759.2 type=exon
	MVWNMPEL
	>rna-XR_002663545.1_20 [1829 - 1849] gene-LOC106438439 name=LOC106438439 seq_id=NC_027759.2 type=exon
	MIKELHV
	>rna-XR_002663545.1_21 [1845 - 1862] gene-LOC106438439 name=LOC106438439 seq_id=NC_027759.2 type=exon
	MFNQAL
	>rna-XR_002663545.1_22 [1897 - 1938] gene-LOC106438439 name=LOC106438439 seq_id=NC_027759.2 type=exon
	MLSGFQSTSAKSYF
	>rna-XR_002663545.1_23 [2168 - 2188] gene-LOC106438439 name=LOC106438439 seq_id=NC_027759.2 type=exon
	MTTIYRL
	>rna-XR_002663545.1_24 [2161 - 2250] gene-LOC106438439 name=LOC106438439 seq_id=NC_027759.2 type=exon
	MPHDHHLQIMMIFNKPDRPVYFHYLFCISN
	>rna-XR_002663545.1_25 [2297 - 2317] gene-LOC106438439 name=LOC106438439 seq_id=NC_027759.2 type=exon
	MHILCIC
	>rna-XR_002663545.1_26 [2265 - 2330] gene-LOC106438439 name=LOC106438439 seq_id=NC_027759.2 type=exon
	MKCINLHSLFTCISYVFVRTTK
	>rna-XR_002663545.1_27 [2370 - 2429] gene-LOC106438439 name=LOC106438439 seq_id=NC_027759.2 type=exon
	MFCLDSFMCSGYLRTHQNNY
	>rna-XR_002663545.1_28 [2432 - 2476] gene-LOC106438439 name=LOC106438439 seq_id=NC_027759.2 type=exon
	MLLEHFMYKFKEEIH
	>rna-XR_002663545.1_29 [2308 - 2493] gene-LOC106438439 name=LOC106438439 seq_id=NC_027759.2 type=exon
	MYLLELPSEDISYTSMVEFMICFVWIVSCVLVIFALIKITINAIRTFYVQIQRRNSLESV
	RI
	>rna-XR_002663545.1_30 [2523 - 2540] gene-LOC106438439 name=LOC106438439 seq_id=NC_027759.2 type=exon
	MNGLKG
	>rna-XR_002663545.1_31 [2548 - 2568] gene-LOC106438439 name=LOC106438439 seq_id=NC_027759.2 type=exon
	MCVVHSD
	>rna-XR_002663545.1_32 [2513 - 2647] gene-LOC106438439 name=LOC106438439 seq_id=NC_027759.2 type=exon
	MVYNEWLEGVNICVWSIPIETKRNSGYVRTISLYCVLIIPNFLKL
	>rna-XR_002663545.1_33 [2658 - 2696] gene-LOC106438439 name=LOC106438439 seq_id=NC_027759.2 type=exon
	MYSYHQIDLLYTI
	>rna-XR_002663545.1_34 [2708 - 2863] gene-LOC106438439 name=LOC106438439 seq_id=NC_027759.2 type=exon
	MIYSFEYFVWLGIFESNIHNFMQIQTVCSTNINSMCIQKKKCYKKIMSHYYL
	>rna-XR_002663545.1_35 [2880 - 2900] gene-LOC106438439 name=LOC106438439 seq_id=NC_027759.2 type=exon
	MMRRLSF
	>rna-XR_002663545.1_36 [3053 - 3097] gene-LOC106438439 name=LOC106438439 seq_id=NC_027759.2 type=exon
	MVEMIKVTKFILSIN
	>rna-XR_002663545.1_37 [3152 - 3208] gene-LOC106438439 name=LOC106438439 seq_id=NC_027759.2 type=exon
	MSVIGKLIILILKEFEIDK
	>rna-XR_002663545.1_38 [3329 - 3358] gene-LOC106438439 name=LOC106438439 seq_id=NC_027759.2 type=exon
	MSSSSSNQAT
	>rna-XR_002663545.1_39 [3419 - 3490] gene-LOC106438439 name=LOC106438439 seq_id=NC_027759.2 type=exon
	MFWSLLTYLQAHEYFRENNNLGVF
	>rna-XR_002663545.1_40 [3453 - 3515] gene-LOC106438439 name=LOC106438439 seq_id=NC_027759.2 type=exon
	MSILEKIIIWVYFKDKMRRNS
	>rna-XR_002663545.1_41 [3573 - 3593] gene-LOC106438439 name=LOC106438439 seq_id=NC_027759.2 type=exon
	MHAIDQQ
	>rna-XR_002663545.1_42 [3577 - 3609] gene-LOC106438439 name=LOC106438439 seq_id=NC_027759.2 type=exon
	MPSINSEVHKT
	>rna-XR_002663545.1_43 [3692 - 3760] gene-LOC106438439 name=LOC106438439 seq_id=NC_027759.2 type=exon
	MCSAIVLGNTRFQQTTIRIFSRF
	>rna-XR_002663545.1_44 [3830 - 3877] gene-LOC106438439 name=LOC106438439 seq_id=NC_027759.2 type=exon
	MHFIQFMLMNCFAMSE
	>rna-XR_002663545.1_45 [4037 - 4072] gene-LOC106438439 name=LOC106438439 seq_id=NC_027759.2 type=exon
	MIGSAPELIPLS
	>rna-XR_002663545.1_46 [4024 - 4098] gene-LOC106438439 name=LOC106438439 seq_id=NC_027759.2 type=exon
	MDNYDDRFSTRTNSFELVLLETRKS
	>rna-XR_002663545.1_47 [4287 - 4373] gene-LOC106438439 name=LOC106438439 seq_id=NC_027759.2 type=exon
	MGLFLTKFQWRGIGKGKGVLRTNKLTLMG
	>rna-XR_002663545.1_48 [4464 - 4556] gene-LOC106438439 name=LOC106438439 seq_id=NC_027759.2 type=exon
	MLPSSMLSSTLLGLTSIRSRLIGSLPGWTSF
	>rna-XR_002663545.1_49 [4599 - 4715] gene-LOC106438439 name=LOC106438439 seq_id=NC_027759.2 type=exon
	MKPLLRVAWKSINGINHTMCFVCTCEYNLFTNTYYVISY
	>rna-XR_002663545.1_50 [4702 - 4752] gene-LOC106438439 name=LOC106438439 seq_id=NC_027759.2 type=exon
	MSYLINLKISIISYHLY
	>rna-XR_002664046.1_1 [80 - 247] gene-LOC111214693 name=LOC111214693 seq_id=NC_027759.2 type=exon
	MNYEHIFILYLRISHPTFIYGNLFSTIYYICVCALMVVPGSLYATSIYRSRYEICG
	>rna-XR_002664046.1_2 [138 - 272] gene-LOC111214693 name=LOC111214693 seq_id=NC_027759.2 type=exon
	MEIFFLQYIIYVCVLLWSCLAPCMPQVYTDLVTKSVASGVQSSQA
	>rna-XR_002664046.1_3 [272 - 295] gene-LOC111214693 name=LOC111214693 seq_id=NC_027759.2 type=exon
	MTKAFLGV
	>rna-XR_002664046.1_4 [169 - 315] gene-LOC111214693 name=LOC111214693 seq_id=NC_027759.2 type=exon
	MCVCSYGRAWLPVCHKYIPISLRNLWLVAYRVVKHDQSFSWCISSILSL
	>rna-XR_002664046.1_5 [334 - 402] gene-LOC111214693 name=LOC111214693 seq_id=NC_027759.2 type=exon
	MVFYMHFIIRMDYVLLYTSSLFS
	>rna-XR_002664046.1_6 [330 - 449] gene-LOC111214693 name=LOC111214693 seq_id=NC_027759.2 type=exon
	MYGVLYAFYYTHGLCFIVHIFIIFLTSLIRVTCNRVLRNY
	>rna-XR_002664046.1_7 [371 - 457] gene-LOC111214693 name=LOC111214693 seq_id=NC_027759.2 type=exon
	MFYCTHLHYFLNILNTSNVQPCFKKLLDC
	>rna-XR_002664046.1_8 [590 - 682] gene-LOC111214693 name=LOC111214693 seq_id=NC_027759.2 type=exon
	MRELIVTPHFCYAYTCLLNPIFYGKKFPFSF
	>rna-XR_002664046.1_9 [624 - 719] gene-LOC111214693 name=LOC111214693 seq_id=NC_027759.2 type=exon
	MHIHAYLTPFFMGKNFHFRSRSSKQPHLNHII
	>rna-XR_002664046.1_10 [730 - 777] gene-LOC111214693 name=LOC111214693 seq_id=NC_027759.2 type=exon
	MFSVIYGKNVMFYYNL
	>rna-XR_002664046.1_11 [755 - 841] gene-LOC111214693 name=LOC111214693 seq_id=NC_027759.2 type=exon
	MLCFIIIFRLYTFTISTIKVVCTFAELIN
	>rna-XR_002664046.1_12 [856 - 879] gene-LOC111214693 name=LOC111214693 seq_id=NC_027759.2 type=exon
	MFIINPVN
	>rna-XR_002664046.1_13 [951 - 983] gene-LOC111214693 name=LOC111214693 seq_id=NC_027759.2 type=exon
	MVEIVNVYNLN
	>rna-XR_002664046.1_14 [1049 - 1102] gene-LOC111214693 name=LOC111214693 seq_id=NC_027759.2 type=exon
	MNNTCELISCLYKWGLKF
	>rna-XR_002664046.1_15 [1335 - 1361] gene-LOC111214693 name=LOC111214693 seq_id=NC_027759.2 type=exon
	MHLSLPIFF
	>rna-XR_002664046.1_16 [1303 - 1419] gene-LOC111214693 name=LOC111214693 seq_id=NC_027759.2 type=exon
	MRFVKNCLTLSCICPSQFFFNVSFFKIIDTSKAMFQRQL
	>rna-XR_002664046.1_17 [1364 - 1477] gene-LOC111214693 name=LOC111214693 seq_id=NC_027759.2 type=exon
	MFLSSKSSTLVRRCFRGNSRFVHIRVSGLMYSVYLCMI
	>rna-XR_002661141.1_1 [7 - 48] gene-LOC111209711 name=LOC111209711 seq_id=NC_027775.2 type=exon
	MKIFGVLCVASFSS
	>rna-XR_002661141.1_2 [77 - 97] gene-LOC111209711 name=LOC111209711 seq_id=NC_027775.2 type=exon
	MFCPLCM
	>rna-XR_002661141.1_3 [48 - 149] gene-LOC111209711 name=LOC111209711 seq_id=NC_027775.2 type=exon
	MKRNSIYQLKCSVPFACKRDKETDKSHKERGLSE
	>rna-XR_002661141.1_4 [333 - 350] gene-LOC111209711 name=LOC111209711 seq_id=NC_027775.2 type=exon
	MVPCLL
	>rna-XR_002661141.1_5 [232 - 378] gene-LOC111209711 name=LOC111209711 seq_id=NC_027775.2 type=exon
	MFFLDLDKNPRLDFPKGVLNSISFLYSYVCIFSLWFLVYFNLWRWKNCE
	>rna-XR_002661141.1_6 [314 - 382] gene-LOC111209711 name=LOC111209711 seq_id=NC_027775.2 type=exon
	MCVFSLYGSLSTLISGDGRTASE
	>rna-XR_002661141.1_7 [382 - 405] gene-LOC111209711 name=LOC111209711 seq_id=NC_027775.2 type=exon
	MSWDKRKT
	>rna-XR_002661141.1_8 [363 - 425] gene-LOC111209711 name=LOC111209711 seq_id=NC_027775.2 type=exon
	MEELRVNELGQKKNIATDRRE
	>rna-XR_002661141.1_9 [612 - 659] gene-LOC111209711 name=LOC111209711 seq_id=NC_027775.2 type=exon
	MRFKRWLVPCIDFGSI
	>rna-XR_002661141.1_10 [667 - 708] gene-LOC111209711 name=LOC111209711 seq_id=NC_027775.2 type=exon
	MRGESFKLSPFIIL
	>rna-XR_002661141.1_11 [715 - 735] gene-LOC111209711 name=LOC111209711 seq_id=NC_027775.2 type=exon
	MGSIEKA
	>rna-XR_002661141.1_12 [626 - 742] gene-LOC111209711 name=LOC111209711 seq_id=NC_027775.2 type=exon
	MACSLYRFWFDLIACEVRALNFHHSLYFNVWVVSRKLNL
	>rna-XR_002661141.1_13 [762 - 782] gene-LOC111209711 name=LOC111209711 seq_id=NC_027775.2 type=exon
	MKLSMST
	>rna-XR_002661141.1_14 [820 - 867] gene-LOC111209711 name=LOC111209711 seq_id=NC_027775.2 type=exon
	MYILYYHLFFPFLGAF
	>rna-XR_002661141.1_15 [1025 - 1066] gene-LOC111209711 name=LOC111209711 seq_id=NC_027775.2 type=exon
	MVCSYILIPRSIII
	>rna-XR_002661141.1_16 [955 - 1119] gene-LOC111209711 name=LOC111209711 seq_id=NC_027775.2 type=exon
	MLQEYSGHDICIIRKSRWLLGYLNGLLVHFDSTKYNYIIIFYSLYIYQKNNYVGI
	>rna-XR_002661141.1_17 [1109 - 1132] gene-LOC111209711 name=LOC111209711 seq_id=NC_027775.2 type=exon
	MLAYNIIS
	>rna-XR_002661141.1_18 [1170 - 1187] gene-LOC111209711 name=LOC111209711 seq_id=NC_027775.2 type=exon
	MLHLLT
	>rna-XR_002661141.1_19 [1187 - 1231] gene-LOC111209711 name=LOC111209711 seq_id=NC_027775.2 type=exon
	MNILRIFLWWFVFLD
	>rna-XR_002661141.1_20 [1255 - 1281] gene-LOC111209711 name=LOC111209711 seq_id=NC_027775.2 type=exon
	MQTKKAYSV
	>rna-XR_002661141.1_21 [1309 - 1338] gene-LOC111209711 name=LOC111209711 seq_id=NC_027775.2 type=exon
	MCHVFPLLYC
	>rna-XR_002661141.1_22 [1316 - 1390] gene-LOC111209711 name=LOC111209711 seq_id=NC_027775.2 type=exon
	MSFRFCTVEAVEKYCCLSTNINTSN
	>rna-XR_002661141.1_23 [1281 - 1433] gene-LOC111209711 name=LOC111209711 seq_id=NC_027775.2 type=exon
	MKLLCWFHIDVSCLSAFVLLRLLKNIVVCRQISIPVINFRSYCYNCYLSVD
	>rna-XR_002661141.1_24 [1494 - 1541] gene-LOC111209711 name=LOC111209711 seq_id=NC_027775.2 type=exon
	MCVSHRKRSLYILQSL
	>rna-XR_002661141.1_25 [1436 - 1573] gene-LOC111209711 name=LOC111209711 seq_id=NC_027775.2 type=exon
	MSRWAETMVILIPVRIVWSDVCITSEAIFVYIAIVVMFVSQMHNMF
	>rna-XR_002661141.1_26 [1632 - 1661] gene-LOC111209711 name=LOC111209711 seq_id=NC_027775.2 type=exon
	MNHIVYGFLS
	>rna-XR_002661140.1_1 [7 - 48] gene-LOC111209711 name=LOC111209711 seq_id=NC_027775.2 type=exon
	MKIFGVLCVASFSS
	>rna-XR_002661140.1_2 [77 - 97] gene-LOC111209711 name=LOC111209711 seq_id=NC_027775.2 type=exon
	MFCPLCM
	>rna-XR_002661140.1_3 [48 - 149] gene-LOC111209711 name=LOC111209711 seq_id=NC_027775.2 type=exon
	MKRNSIYQLKCSVPFACKRDKETDKSHKERGLSE
	>rna-XR_002661140.1_4 [232 - 345] gene-LOC111209711 name=LOC111209711 seq_id=NC_027775.2 type=exon
	MFFLDLDKNPRLDFPKGVLNSISFLYSYISGDGRTASE
	>rna-XR_002661140.1_5 [345 - 368] gene-LOC111209711 name=LOC111209711 seq_id=NC_027775.2 type=exon
	MSWDKRKT
	>rna-XR_002661140.1_6 [326 - 388] gene-LOC111209711 name=LOC111209711 seq_id=NC_027775.2 type=exon
	MEELRVNELGQKKNIATDRRE
	>rna-XR_002661140.1_7 [575 - 622] gene-LOC111209711 name=LOC111209711 seq_id=NC_027775.2 type=exon
	MRFKRWLVPCIDFGSI
	>rna-XR_002661140.1_8 [630 - 671] gene-LOC111209711 name=LOC111209711 seq_id=NC_027775.2 type=exon
	MRGESFKLSPFIIL
	>rna-XR_002661140.1_9 [678 - 698] gene-LOC111209711 name=LOC111209711 seq_id=NC_027775.2 type=exon
	MGSIEKA
	>rna-XR_002661140.1_10 [589 - 705] gene-LOC111209711 name=LOC111209711 seq_id=NC_027775.2 type=exon
	MACSLYRFWFDLIACEVRALNFHHSLYFNVWVVSRKLNL
	>rna-XR_002661140.1_11 [725 - 745] gene-LOC111209711 name=LOC111209711 seq_id=NC_027775.2 type=exon
	MKLSMST
	>rna-XR_002661140.1_12 [783 - 830] gene-LOC111209711 name=LOC111209711 seq_id=NC_027775.2 type=exon
	MYILYYHLFFPFLGAF
	>rna-XR_002661140.1_13 [988 - 1029] gene-LOC111209711 name=LOC111209711 seq_id=NC_027775.2 type=exon
	MVCSYILIPRSIII
	>rna-XR_002661140.1_14 [918 - 1082] gene-LOC111209711 name=LOC111209711 seq_id=NC_027775.2 type=exon
	MLQEYSGHDICIIRKSRWLLGYLNGLLVHFDSTKYNYIIIFYSLYIYQKNNYVGI
	>rna-XR_002661140.1_15 [1072 - 1095] gene-LOC111209711 name=LOC111209711 seq_id=NC_027775.2 type=exon
	MLAYNIIS
	>rna-XR_002661140.1_16 [1133 - 1150] gene-LOC111209711 name=LOC111209711 seq_id=NC_027775.2 type=exon
	MLHLLT
	>rna-XR_002661140.1_17 [1150 - 1194] gene-LOC111209711 name=LOC111209711 seq_id=NC_027775.2 type=exon
	MNILRIFLWWFVFLD
	>rna-XR_002661140.1_18 [1218 - 1244] gene-LOC111209711 name=LOC111209711 seq_id=NC_027775.2 type=exon
	MQTKKAYSV
	>rna-XR_002661140.1_19 [1272 - 1301] gene-LOC111209711 name=LOC111209711 seq_id=NC_027775.2 type=exon
	MCHVFPLLYC
	>rna-XR_002661140.1_20 [1279 - 1353] gene-LOC111209711 name=LOC111209711 seq_id=NC_027775.2 type=exon
	MSFRFCTVEAVEKYCCLSTNINTSN
	>rna-XR_002661140.1_21 [1244 - 1396] gene-LOC111209711 name=LOC111209711 seq_id=NC_027775.2 type=exon
	MKLLCWFHIDVSCLSAFVLLRLLKNIVVCRQISIPVINFRSYCYNCYLSVD
	>rna-XR_002661140.1_22 [1457 - 1504] gene-LOC111209711 name=LOC111209711 seq_id=NC_027775.2 type=exon
	MCVSHRKRSLYILQSL
	>rna-XR_002661140.1_23 [1399 - 1536] gene-LOC111209711 name=LOC111209711 seq_id=NC_027775.2 type=exon
	MSRWAETMVILIPVRIVWSDVCITSEAIFVYIAIVVMFVSQMHNMF
	>rna-XR_002661140.1_24 [1595 - 1624] gene-LOC111209711 name=LOC111209711 seq_id=NC_027775.2 type=exon
	MNHIVYGFLS
	>rna-XR_002661139.1_1 [7 - 48] gene-LOC111209711 name=LOC111209711 seq_id=NC_027775.2 type=exon
	MKIFGVLCVASFSS
	>rna-XR_002661139.1_2 [77 - 97] gene-LOC111209711 name=LOC111209711 seq_id=NC_027775.2 type=exon
	MFCPLCM
	>rna-XR_002661139.1_3 [48 - 149] gene-LOC111209711 name=LOC111209711 seq_id=NC_027775.2 type=exon
	MKRNSIYQLKCSVPFACKRDKETDKSHKERGLSE
	>rna-XR_002661139.1_4 [232 - 306] gene-LOC111209711 name=LOC111209711 seq_id=NC_027775.2 type=exon
	MFFLDLDKNPRLDFPKDLWRWKNCE
	>rna-XR_002661139.1_5 [310 - 333] gene-LOC111209711 name=LOC111209711 seq_id=NC_027775.2 type=exon
	MSWDKRKT
	>rna-XR_002661139.1_6 [291 - 353] gene-LOC111209711 name=LOC111209711 seq_id=NC_027775.2 type=exon
	MEELRVNELGQKKNIATDRRE
	>rna-XR_002661139.1_7 [540 - 587] gene-LOC111209711 name=LOC111209711 seq_id=NC_027775.2 type=exon
	MRFKRWLVPCIDFGSI
	>rna-XR_002661139.1_8 [595 - 636] gene-LOC111209711 name=LOC111209711 seq_id=NC_027775.2 type=exon
	MRGESFKLSPFIIL
	>rna-XR_002661139.1_9 [643 - 663] gene-LOC111209711 name=LOC111209711 seq_id=NC_027775.2 type=exon
	MGSIEKA
	>rna-XR_002661139.1_10 [554 - 670] gene-LOC111209711 name=LOC111209711 seq_id=NC_027775.2 type=exon
	MACSLYRFWFDLIACEVRALNFHHSLYFNVWVVSRKLNL
	>rna-XR_002661139.1_11 [690 - 710] gene-LOC111209711 name=LOC111209711 seq_id=NC_027775.2 type=exon
	MKLSMST
	>rna-XR_002661139.1_12 [748 - 795] gene-LOC111209711 name=LOC111209711 seq_id=NC_027775.2 type=exon
	MYILYYHLFFPFLGAF
	>rna-XR_002661139.1_13 [953 - 994] gene-LOC111209711 name=LOC111209711 seq_id=NC_027775.2 type=exon
	MVCSYILIPRSIII
	>rna-XR_002661139.1_14 [883 - 1047] gene-LOC111209711 name=LOC111209711 seq_id=NC_027775.2 type=exon
	MLQEYSGHDICIIRKSRWLLGYLNGLLVHFDSTKYNYIIIFYSLYIYQKNNYVGI
	>rna-XR_002661139.1_15 [1037 - 1060] gene-LOC111209711 name=LOC111209711 seq_id=NC_027775.2 type=exon
	MLAYNIIS
	>rna-XR_002661139.1_16 [1098 - 1115] gene-LOC111209711 name=LOC111209711 seq_id=NC_027775.2 type=exon
	MLHLLT
	>rna-XR_002661139.1_17 [1115 - 1159] gene-LOC111209711 name=LOC111209711 seq_id=NC_027775.2 type=exon
	MNILRIFLWWFVFLD
	>rna-XR_002661139.1_18 [1183 - 1209] gene-LOC111209711 name=LOC111209711 seq_id=NC_027775.2 type=exon
	MQTKKAYSV
	>rna-XR_002661139.1_19 [1237 - 1266] gene-LOC111209711 name=LOC111209711 seq_id=NC_027775.2 type=exon
	MCHVFPLLYC
	>rna-XR_002661139.1_20 [1244 - 1318] gene-LOC111209711 name=LOC111209711 seq_id=NC_027775.2 type=exon
	MSFRFCTVEAVEKYCCLSTNINTSN
	>rna-XR_002661139.1_21 [1209 - 1361] gene-LOC111209711 name=LOC111209711 seq_id=NC_027775.2 type=exon
	MKLLCWFHIDVSCLSAFVLLRLLKNIVVCRQISIPVINFRSYCYNCYLSVD
	>rna-XR_002661139.1_22 [1422 - 1469] gene-LOC111209711 name=LOC111209711 seq_id=NC_027775.2 type=exon
	MCVSHRKRSLYILQSL
	>rna-XR_002661139.1_23 [1364 - 1501] gene-LOC111209711 name=LOC111209711 seq_id=NC_027775.2 type=exon
	MSRWAETMVILIPVRIVWSDVCITSEAIFVYIAIVVMFVSQMHNMF
	>rna-XR_002661139.1_24 [1560 - 1589] gene-LOC111209711 name=LOC111209711 seq_id=NC_027775.2 type=exon
	MNHIVYGFLS
	>rna-XR_002661288.1_1 [226 - 297] gene-LOC111209882 name=LOC111209882 seq_id=NC_027775.2 type=exon
	MQESDNTYKIKGNKLICYPFQIQP
	>rna-XR_002661288.1_2 [301 - 324] gene-LOC111209882 name=LOC111209882 seq_id=NC_027775.2 type=exon
	MYLHHRFF
	>rna-XR_002661288.1_3 [430 - 471] gene-LOC111209882 name=LOC111209882 seq_id=NC_027775.2 type=exon
	MDPLIEVMFSCYYS
	>rna-XR_002661288.1_4 [580 - 648] gene-LOC111209882 name=LOC111209882 seq_id=NC_027775.2 type=exon
	MNIHICFSSMYYMLKYGHKINIC
	>rna-XR_002661288.1_5 [594 - 755] gene-LOC111209882 name=LOC111209882 seq_id=NC_027775.2 type=exon
	MFFFNVLHAQIWSQNKYMLMWEKKLTEESEHTKGELYKINLYMVYFCVLILVLS
	>rna-XR_002661288.1_6 [769 - 792] gene-LOC111209882 name=LOC111209882 seq_id=NC_027775.2 type=exon
	MNLGDFVS
	>rna-XR_002661288.1_7 [799 - 852] gene-LOC111209882 name=LOC111209882 seq_id=NC_027775.2 type=exon
	MYTKLCIHVLHAYLPIFL
	>rna-XR_002661288.1_8 [795 - 863] gene-LOC111209882 name=LOC111209882 seq_id=NC_027775.2 type=exon
	MYVYQVMYTCVACISTYFSLIGI
	>rna-XR_002661288.1_9 [821 - 868] gene-LOC111209882 name=LOC111209882 seq_id=NC_027775.2 type=exon
	MCCMHIYLFFFDWHMI
	>rna-XR_002661288.1_10 [931 - 966] gene-LOC111209882 name=LOC111209882 seq_id=NC_027775.2 type=exon
	MCVYTQYLLDLS
	>rna-XR_002661288.1_11 [976 - 1005] gene-LOC111209882 name=LOC111209882 seq_id=NC_027775.2 type=exon
	MSSSIWVTFL
	>rna-XR_002661288.1_12 [888 - 1022] gene-LOC111209882 name=LOC111209882 seq_id=NC_027775.2 type=exon
	MILSYNIFTHDIYVNVCIHTISVRPVIRSNVFFYLGYVSLTNFAC
	>rna-XR_002661288.1_13 [1120 - 1170] gene-LOC111209882 name=LOC111209882 seq_id=NC_027775.2 type=exon
	MAPNYKRGGWTSTTMIL
	>rna-XR_002661288.1_14 [1146 - 1253] gene-LOC111209882 name=LOC111209882 seq_id=NC_027775.2 type=exon
	MDFHDDDSMKIDYYLIKFGLLMFIKLPKEGECVVNT
	>rna-XR_002661288.1_15 [1273 - 1290] gene-LOC111209882 name=LOC111209882 seq_id=NC_027775.2 type=exon
	MQEDLP
	>rna-XR_002661288.1_16 [1238 - 1309] gene-LOC111209882 name=LOC111209882 seq_id=NC_027775.2 type=exon
	MCCEHMIRRLSTCRRTCRRVCRTH
	>rna-XR_002661288.1_17 [1316 - 1390] gene-LOC111209882 name=LOC111209882 seq_id=NC_027775.2 type=exon
	MERYKVEFCEKTAKILRLYSTFEEF
	>rna-XR_001272553.2_1 [26 - 43] gene-LOC106359524 name=LOC106359524 seq_id=NC_027764.2 type=exon
	MGKRYP
	>rna-XR_001272553.2_2 [143 - 271] gene-LOC106359524 name=LOC106359524 seq_id=NC_027764.2 type=exon
	MDLSKLSINHVYDPFLHLNQHQRNILNRAQWLQTYILCLWSWL
	>rna-XR_001272553.2_3 [232 - 327] gene-LOC106359524 name=LOC106359524 seq_id=NC_027764.2 type=exon
	MVANLHIMPLELVINFSHLNVGLLINGFNPCF
	>rna-XR_001272553.2_4 [308 - 358] gene-LOC106359524 name=LOC106359524 seq_id=NC_027764.2 type=exon
	MGLTHVSKYLCTLYFGP
	>rna-XR_001272553.2_5 [364 - 387] gene-LOC106359524 name=LOC106359524 seq_id=NC_027764.2 type=exon
	MSLPLAFS
	>rna-XR_001272553.2_6 [321 - 467] gene-LOC106359524 name=LOC106359524 seq_id=NC_027764.2 type=exon
	MFLNICAHYISGRRDVSPVGIQLGFLNYTLGKPPIYNTHTHDCIFIRRI
	>rna-XR_001272553.2_7 [549 - 575] gene-LOC106359524 name=LOC106359524 seq_id=NC_027764.2 type=exon
	MTLSTLFQM
	>rna-XR_001272553.2_8 [699 - 764] gene-LOC106359524 name=LOC106359524 seq_id=NC_027764.2 type=exon
	MTDRTYLYSIITANNFHNTCIF
	>rna-XR_001272553.2_9 [804 - 824] gene-LOC106359524 name=LOC106359524 seq_id=NC_027764.2 type=exon
	MKNYSES
	>rna-XR_001284807.2_1 [56 - 79] gene-LOC106424115 name=LOC106424115 seq_id=NC_027764.2 type=exon
	MLIKQLDL
	>rna-XR_001284807.2_2 [163 - 225] gene-LOC106424115 name=LOC106424115 seq_id=NC_027764.2 type=exon
	MRDFESFCTENLCGFYLIISC
	>rna-XR_001284807.2_3 [198 - 302] gene-LOC106424115 name=LOC106424115 seq_id=NC_027764.2 type=exon
	MWVLFNYKLLEDREEMQQRKLTEESEHLQGTVMCQ
	>rna-XR_001284807.2_4 [445 - 510] gene-LOC106424115 name=LOC106424115 seq_id=NC_027764.2 type=exon
	MGDVDKTDALSLSFRYVLRFFL
	>rna-XR_001284807.2_5 [452 - 529] gene-LOC106424115 name=LOC106424115 seq_id=NC_027764.2 type=exon
	MWIRLTPFHYHFVMCYVFFFSFLYWC
	>rna-XR_001284807.2_6 [562 - 618] gene-LOC106424115 name=LOC106424115 seq_id=NC_027764.2 type=exon
	MFLLKQFGGVKLRFIYQIL
	>rna-XR_001284807.2_7 [673 - 735] gene-LOC106424115 name=LOC106424115 seq_id=NC_027764.2 type=exon
	MIMNPPPENEINIKWEDTSSI
	>rna-XR_001284807.2_8 [698 - 805] gene-LOC106424115 name=LOC106424115 seq_id=NC_027764.2 type=exon
	MRSISSGKILQVYKFQVESVAIRDAFLSHGGFNGVS
	>rna-XR_001284807.2_9 [904 - 921] gene-LOC106424115 name=LOC106424115 seq_id=NC_027764.2 type=exon
	MWMVSV
	>rna-XR_001284807.2_10 [783 - 935] gene-LOC106424115 name=LOC106424115 seq_id=NC_027764.2 type=exon
	MVDSMGFLDLKLKIGKSTCWLLYSEALVDFSLLFVVKNLVHVDGVSLKVLA
	>rna-XR_001284807.2_11 [942 - 962] gene-LOC106424115 name=LOC106424115 seq_id=NC_027764.2 type=exon
	MIRQNLS
	>rna-XR_001284807.2_12 [1044 - 1064] gene-LOC106424115 name=LOC106424115 seq_id=NC_027764.2 type=exon
	MEKVFSI
	>rna-XR_001284807.2_13 [1101 - 1151] gene-LOC106424115 name=LOC106424115 seq_id=NC_027764.2 type=exon
	MGIIFCPWFKFRVHESD
	>rna-XR_001284807.2_14 [1141 - 1158] gene-LOC106424115 name=LOC106424115 seq_id=NC_027764.2 type=exon
	MKVINQ
	>rna-XR_001284807.2_15 [1233 - 1358] gene-LOC106424115 name=LOC106424115 seq_id=NC_027764.2 type=exon
	MKIERGQLQGQVLFQKHLASNAVLCLWGPNAWFTHATLKYIH
	>rna-XR_001284807.2_16 [1294 - 1365] gene-LOC106424115 name=LOC106424115 seq_id=NC_027764.2 type=exon
	MLCYAYGAQMRGSHMQRSNTSIKR
	>rna-XR_001284807.2_17 [1304 - 1405] gene-LOC106424115 name=LOC106424115 seq_id=NC_027764.2 type=exon
	MLMGPKCVVHTCNAQIHPLKDKWGLPFSFFVLSD
	>rna-XR_001284807.2_18 [1440 - 1499] gene-LOC106424115 name=LOC106424115 seq_id=NC_027764.2 type=exon
	MIGVALNGLMISRWKGLKRF
	>rna-XR_001284807.2_19 [1512 - 1562] gene-LOC106424115 name=LOC106424115 seq_id=NC_027764.2 type=exon
	METGALWLDYTHSSPIH
	>rna-XR_001284807.2_20 [1683 - 1766] gene-LOC106424115 name=LOC106424115 seq_id=NC_027764.2 type=exon
	MKWKTSERKNCDDSRTIASLALRFLIRG
	>rna-XR_001284807.2_21 [1785 - 1850] gene-LOC106424115 name=LOC106424115 seq_id=NC_027764.2 type=exon
	MVVRGNKISYDIVNASFPVSEK
	>rna-XR_001284807.2_22 [1813 - 1878] gene-LOC106424115 name=LOC106424115 seq_id=NC_027764.2 type=exon
	MTLLMHHFQCQRNRRWVSSSQS
	>rna-XR_001284807.2_23 [1857 - 1928] gene-LOC106424115 name=LOC106424115 seq_id=NC_027764.2 type=exon
	MGFFFTELASHSLLLILSTCQDKS
	>rna-XR_001284807.2_24 [2103 - 2135] gene-LOC106424115 name=LOC106424115 seq_id=NC_027764.2 type=exon
	MKPRRVSFPSI
	>rna-XR_001284807.2_25 [2087 - 2149] gene-LOC106424115 name=LOC106424115 seq_id=NC_027764.2 type=exon
	MECKIHEAKEGEFPIHIKCLK
	>rna-XR_001272725.2_1 [176 - 211] gene-LOC106360231 name=LOC106360231 seq_id=NC_027764.2 type=exon
	MLLFCSRFSGAD
	>rna-XR_001272725.2_2 [352 - 399] gene-LOC106360231 name=LOC106360231 seq_id=NC_027764.2 type=exon
	MAKMVITLKSILSVFF
	>rna-XR_001272725.2_3 [416 - 478] gene-LOC106360231 name=LOC106360231 seq_id=NC_027764.2 type=exon
	MMLTSNTNPKIQVQGRKHFYF
	>rna-XR_001272725.2_4 [557 - 598] gene-LOC106360231 name=LOC106360231 seq_id=NC_027764.2 type=exon
	MLALFTIVRMLQQF
	>rna-XR_002657824.1_1 [373 - 435] gene-LOC111205331 name=LOC111205331 seq_id=NC_027770.2 type=exon
	MDRSSSVYFAGTASHVRLLSA
	>rna-XR_002657824.1_2 [438 - 461] gene-LOC111205331 name=LOC111205331 seq_id=NC_027770.2 type=exon
	MLNGVATL
	>rna-XR_001279212.2_1 [21 - 131] gene-LOC106395336 name=LOC106395336 seq_id=NC_027770.2 type=exon
	MCQVKNRLNGEYHVLSSRTIQFYFQSFAFFDSFIFYF
	>rna-XR_001279212.2_2 [176 - 193] gene-LOC106395336 name=LOC106395336 seq_id=NC_027770.2 type=exon
	MNILLT
	>rna-XR_001279212.2_3 [58 - 249] gene-LOC106395336 name=LOC106395336 seq_id=NC_027770.2 type=exon
	MFSLHVQFNSIFSHLPSLILLFFIFDVEYGIISNGSARTYEYLTNVKTIRDIGAVQSEIH
	TLLL
	>rna-XR_001279212.2_4 [309 - 356] gene-LOC106395336 name=LOC106395336 seq_id=NC_027770.2 type=exon
	MLAGVHQGSGVRITQE
	>rna-XR_001279212.2_5 [356 - 391] gene-LOC106395336 name=LOC106395336 seq_id=NC_027770.2 type=exon
	MSVILEYRHRYT
	>rna-XR_001279212.2_6 [432 - 485] gene-LOC106395336 name=LOC106395336 seq_id=NC_027770.2 type=exon
	MLLRGILFLFSYIEYFYS
	>rna-XR_002657946.1_1 [161 - 181] gene-LOC111205394 name=LOC111205394 seq_id=NC_027770.2 type=exon
	MGRGFLF
	>rna-XR_002657946.1_2 [190 - 240] gene-LOC111205394 name=LOC111205394 seq_id=NC_027770.2 type=exon
	MLFGSKTLAIHVRSSSI
	>rna-XR_002657946.1_3 [221 - 274] gene-LOC111205394 name=LOC111205394 seq_id=NC_027770.2 type=exon
	MLDLLRSNRITPPCLRSD
	>rna-XR_002652944.1_1 [71 - 136] gene-LOC111198823 name=LOC111198823 seq_id=NC_027762.2 type=exon
	MLLLSLTLLKVRVLQGSDDVHR
	>rna-XR_002652944.1_2 [123 - 149] gene-LOC111198823 name=LOC111198823 seq_id=NC_027762.2 type=exon
	MMFTGNARY
	>rna-XR_002652944.1_3 [249 - 275] gene-LOC111198823 name=LOC111198823 seq_id=NC_027762.2 type=exon
	MVLLTVKVC
	>rna-XR_002652944.1_4 [272 - 340] gene-LOC111198823 name=LOC111198823 seq_id=NC_027762.2 type=exon
	MLTRDTNPKIQVQLRYNTSIFRK
	>rna-XR_002652944.1_5 [389 - 421] gene-LOC111198823 name=LOC111198823 seq_id=NC_027762.2 type=exon
	MKMLSWVFYRE
	>rna-XR_002652935.1_1 [19 - 72] gene-LOC111198781 name=LOC111198781 seq_id=NC_027762.2 type=exon
	MVTVLSLSISPSSFYLFN
	>rna-XR_002652935.1_2 [116 - 157] gene-LOC111198781 name=LOC111198781 seq_id=NC_027762.2 type=exon
	MLRRPLTRLVQVGN
	>rna-XR_002652935.1_3 [355 - 414] gene-LOC111198781 name=LOC111198781 seq_id=NC_027762.2 type=exon
	MMINGYALKISGSKVFLSYI
	>rna-XR_002652935.1_4 [365 - 427] gene-LOC111198781 name=LOC111198781 seq_id=NC_027762.2 type=exon
	MAMLLKFQDLRCFLAIYRSRI
	>rna-XR_002652935.1_5 [524 - 574] gene-LOC111198781 name=LOC111198781 seq_id=NC_027762.2 type=exon
	MLNGGVETFESQDYDCC
	>rna-XR_002652935.1_6 [477 - 581] gene-LOC111198781 name=LOC111198781 seq_id=NC_027762.2 type=exon
	MHTRFIDVLILNLEALCLMGVLRLLNLRIMIVANV
	>rna-XR_002652935.1_7 [577 - 606] gene-LOC111198781 name=LOC111198781 seq_id=NC_027762.2 type=exon
	MYDRENLFGE
	>rna-XR_002652935.1_8 [581 - 625] gene-LOC111198781 name=LOC111198781 seq_id=NC_027762.2 type=exon
	MTERIFLVNDIIKLD
	>rna-XR_002652935.1_9 [685 - 705] gene-LOC111198781 name=LOC111198781 seq_id=NC_027762.2 type=exon
	MGLFLSI
	>rna-XR_002652935.1_10 [769 - 864] gene-LOC111198781 name=LOC111198781 seq_id=NC_027762.2 type=exon
	MAKRFNPLNPWFRLYTLFSDVNTPLVVEFPII
	>rna-XR_002652935.1_11 [1014 - 1049] gene-LOC111198781 name=LOC111198781 seq_id=NC_027762.2 type=exon
	MLKNLNLIRICL
	>rna-XR_002652935.1_12 [1043 - 1087] gene-LOC111198781 name=LOC111198781 seq_id=NC_027762.2 type=exon
	MSVIVQEKYVTLDQS
	>rna-XR_002652935.1_13 [1091 - 1135] gene-LOC111198781 name=LOC111198781 seq_id=NC_027762.2 type=exon
	MTSLKSDSSNLVKRF
	>rna-XR_002652935.1_14 [1263 - 1427] gene-LOC111198781 name=LOC111198781 seq_id=NC_027762.2 type=exon
	MIFKDRTELQPKGLVLDYYIVFYLLFTCIIFEVKYIFFILLFIINKKTCAREHLI
	>rna-XR_002652935.1_15 [1433 - 1468] gene-LOC111198781 name=LOC111198781 seq_id=NC_027762.2 type=exon
	MDSLYLPMTDYL
	>rna-XR_001280160.2_1 [39 - 104] gene-LOC106399790 name=LOC106399790 seq_id=NC_027771.2 type=exon
	MLLLSLTLLKVRILQGSDDVHR
	>rna-XR_001280160.2_2 [91 - 117] gene-LOC106399790 name=LOC106399790 seq_id=NC_027771.2 type=exon
	MMFTGNARY
	>rna-XR_001280160.2_3 [217 - 243] gene-LOC106399790 name=LOC106399790 seq_id=NC_027771.2 type=exon
	MVLLTVKVC
	>rna-XR_001280160.2_4 [240 - 293] gene-LOC106399790 name=LOC106399790 seq_id=NC_027771.2 type=exon
	MLTRDTRHKPQNPSTAAI
	>rna-XR_001280160.2_5 [384 - 506] gene-LOC106399790 name=LOC106399790 seq_id=NC_027771.2 type=exon
	MKMLSWAFYREDIATIQRIISFDLYLFALLSTVNWLVFNVT
	>rna-XR_002658380.1_1 [51 - 86] gene-LOC111206228 name=LOC111206228 seq_id=NC_027771.2 type=exon
	MLLFCSRFSGAD
	>rna-XR_002658380.1_2 [227 - 250] gene-LOC111206228 name=LOC111206228 seq_id=NC_027771.2 type=exon
	MAKMVINL
	>rna-XR_002658380.1_3 [290 - 352] gene-LOC111206228 name=LOC111206228 seq_id=NC_027771.2 type=exon
	MMLTSNTNHKIQVQGRKHFYF
	>rna-XR_002658380.1_4 [484 - 513] gene-LOC111206228 name=LOC111206228 seq_id=NC_027771.2 type=exon
	MFLVCNYLHL
	>rna-XR_002655830.1_1 [93 - 200] gene-LOC106375391 name=LOC106375391 seq_id=NC_027768.2 type=exon
	MHLLLLRAHCSICQVPAPILFGPFTFSSLIVFPSLS
	>rna-XR_002655830.1_2 [86 - 232] gene-LOC106375391 name=LOC106375391 seq_id=NC_027768.2 type=exon
	MFDAFASLACSLLYLSGSGTDSFWSVHVFFFDCVPISLIVSPTFFLHRF
	>rna-XR_002655830.1_3 [242 - 277] gene-LOC106375391 name=LOC106375391 seq_id=NC_027768.2 type=exon
	MPEMNAVFTVTY
	>rna-XR_002655830.1_4 [317 - 373] gene-LOC106375391 name=LOC106375391 seq_id=NC_027768.2 type=exon
	MFYQLIAAGFTYVYMNDLV
	>rna-XR_002655830.1_5 [490 - 513] gene-LOC106375391 name=LOC106375391 seq_id=NC_027768.2 type=exon
	MSLQLNFA
	>rna-XR_002655830.1_6 [546 - 602] gene-LOC106375391 name=LOC106375391 seq_id=NC_027768.2 type=exon
	MLSSHHLKKLKYYLVIGSS
	>rna-XR_002655830.1_7 [1012 - 1035] gene-LOC106375391 name=LOC106375391 seq_id=NC_027768.2 type=exon
	MRSRWAMT
	>rna-XR_002655830.1_8 [1105 - 1170] gene-LOC106375391 name=LOC106375391 seq_id=NC_027768.2 type=exon
	MWRSYCLTKSETPSSRIPPHHT
	>rna-XR_002655830.1_9 [1199 - 1225] gene-LOC106375391 name=LOC106375391 seq_id=NC_027768.2 type=exon
	MPTTTASSL
	>rna-XR_002655830.1_10 [1380 - 1460] gene-LOC106375391 name=LOC106375391 seq_id=NC_027768.2 type=exon
	MMFFVSLCVVSTYHNNNRMYPKCVRFI
	>rna-XR_002655830.1_11 [1497 - 1556] gene-LOC106375391 name=LOC106375391 seq_id=NC_027768.2 type=exon
	MYQLPVIETINLSLSFFLFF
	>rna-XR_001275257.2_1 [93 - 200] gene-LOC106375391 name=LOC106375391 seq_id=NC_027768.2 type=exon
	MHLLLLRAHCSICQVPAPILFGPFTFSSLIVFPSLS
	>rna-XR_001275257.2_2 [86 - 232] gene-LOC106375391 name=LOC106375391 seq_id=NC_027768.2 type=exon
	MFDAFASLACSLLYLSGSGTDSFWSVHVFFFDCVPISLIVSPTFFLHRF
	>rna-XR_001275257.2_3 [242 - 304] gene-LOC106375391 name=LOC106375391 seq_id=NC_027768.2 type=exon
	MPEMNAVFTKTWRSRARGLFG
	>rna-XR_001275257.2_4 [317 - 340] gene-LOC106375391 name=LOC106375391 seq_id=NC_027768.2 type=exon
	MRSRWAMT
	>rna-XR_001275257.2_5 [410 - 475] gene-LOC106375391 name=LOC106375391 seq_id=NC_027768.2 type=exon
	MWRSYCLTKSETPSSRIPPHHT
	>rna-XR_001275257.2_6 [504 - 530] gene-LOC106375391 name=LOC106375391 seq_id=NC_027768.2 type=exon
	MPTTTASSL
	>rna-XR_001275257.2_7 [685 - 765] gene-LOC106375391 name=LOC106375391 seq_id=NC_027768.2 type=exon
	MMFFVSLCVVSTYHNNNRMYPKCVRFI
	>rna-XR_001275257.2_8 [802 - 861] gene-LOC106375391 name=LOC106375391 seq_id=NC_027768.2 type=exon
	MYQLPVIETINLSLSFFLFF
	>rna-XR_002656669.1_1 [83 - 100] gene-LOC111204292 name=LOC111204292 seq_id=NC_027769.2 type=exon
	MCIQRL
	>rna-XR_002656669.1_2 [73 - 162] gene-LOC111204292 name=LOC111204292 seq_id=NC_027769.2 type=exon
	MRTHVYSKAVMTPRHCNVHLSFHVFSGHPC
	>rna-XR_002656669.1_3 [222 - 275] gene-LOC111204292 name=LOC111204292 seq_id=NC_027769.2 type=exon
	MGQIILEYVVSICSVVTS
	>rna-XR_002656669.1_4 [396 - 461] gene-LOC111204292 name=LOC111204292 seq_id=NC_027769.2 type=exon
	MAQQNHRFGSLSLPSKLSDSNN
	>rna-XR_002656669.1_5 [640 - 690] gene-LOC111204292 name=LOC111204292 seq_id=NC_027769.2 type=exon
	MINRFKLNSHMIHIIDS
	>rna-XR_002656669.1_6 [909 - 947] gene-LOC111204292 name=LOC111204292 seq_id=NC_027769.2 type=exon
	MWENKVKEDDVLK
	>rna-XR_001278178.2_1 [41 - 58] gene-LOC106390022 name=LOC106390022 seq_id=NC_027769.2 type=exon
	MFNSSN
	>rna-XR_001278178.2_2 [95 - 133] gene-LOC106390022 name=LOC106390022 seq_id=NC_027769.2 type=exon
	MAFSPAVLHTRHL
	>rna-XR_001278178.2_3 [24 - 203] gene-LOC106390022 name=LOC106390022 seq_id=NC_027769.2 type=exon
	MNNRIKCLIHQINRKGKSSHTQHIWPFRRLCYTRATFEKPVYRPGVLFYPVTIKHVFETL
	>rna-XR_001278178.2_4 [301 - 387] gene-LOC106390022 name=LOC106390022 seq_id=NC_027769.2 type=exon
	MSPLAESNTHQTARSLCSLGFGEICENGE
	>rna-XR_001278178.2_5 [393 - 455] gene-LOC106390022 name=LOC106390022 seq_id=NC_027769.2 type=exon
	MREFESFCTENLCGFCLIISC
	>rna-XR_001278178.2_6 [428 - 532] gene-LOC106390022 name=LOC106390022 seq_id=NC_027769.2 type=exon
	MWVLFNYKLLEDREEMQQRKLTEESEHLQGTVMCQ
	>rna-XR_001278178.2_7 [817 - 876] gene-LOC106390022 name=LOC106390022 seq_id=NC_027769.2 type=exon
	MIMNPHRRMRSISSGKILQV
	>rna-XR_001278178.2_8 [675 - 899] gene-LOC106390022 name=LOC106390022 seq_id=NC_027769.2 type=exon
	MVMWIRLSPFHYHSQAVWWSKAQIYISDFVKCAMLFSSTGSRKSASFDDHEPPPENEINI
	KWEDTSSIKISTLKV
	>rna-XR_001278178.2_9 [1048 - 1065] gene-LOC106390022 name=LOC106390022 seq_id=NC_027769.2 type=exon
	MWMVSV
	>rna-XR_001278178.2_10 [927 - 1079] gene-LOC106390022 name=LOC106390022 seq_id=NC_027769.2 type=exon
	MVDSMGFLDLKLKIGKSTCWLLYSEALVDFSLLFVVKNLVHVDGVSLKVLA
	>rna-XR_001278178.2_11 [1085 - 1105] gene-LOC106390022 name=LOC106390022 seq_id=NC_027769.2 type=exon
	MIRQNLS
	>rna-XR_001278178.2_12 [1241 - 1291] gene-LOC106390022 name=LOC106390022 seq_id=NC_027769.2 type=exon
	MGIIFCPWFKFRVHESD
	>rna-XR_001278178.2_13 [1439 - 1459] gene-LOC106390022 name=LOC106390022 seq_id=NC_027769.2 type=exon
	MDLWIAV
	>rna-XR_001271588.2_1 [1 - 99] gene-LOC106352368 name=LOC106352368 seq_id=NC_027765.2 type=exon
	MLDYDYKLRHLSSLFFPFNVLLSPPPQNPTSDN
	>rna-XR_001271588.2_2 [56 - 115] gene-LOC106352368 name=LOC106352368 seq_id=NC_027765.2 type=exon
	MFCSLLPLKTQLLITKIFIG
	>rna-XR_001271588.2_3 [217 - 234] gene-LOC106352368 name=LOC106352368 seq_id=NC_027765.2 type=exon
	MLVLGG
	>rna-XR_001271588.2_4 [203 - 256] gene-LOC106352368 name=LOC106352368 seq_id=NC_027765.2 type=exon
	MDLFLCWFWEAEAASMIW
	>rna-XR_001271588.2_5 [319 - 339] gene-LOC106352368 name=LOC106352368 seq_id=NC_027765.2 type=exon
	MYLSNNI
	>rna-XR_001271588.2_6 [394 - 441] gene-LOC106352368 name=LOC106352368 seq_id=NC_027765.2 type=exon
	MCFLLFFMDACMYVCV
	>rna-XR_001271588.2_7 [423 - 449] gene-LOC106352368 name=LOC106352368 seq_id=NC_027765.2 type=exon
	MHVCVCISV
	>rna-XR_001271588.2_8 [419 - 502] gene-LOC106352368 name=LOC106352368 seq_id=NC_027765.2 type=exon
	MHACMCVYKCIDSGTRSSCGFIHSNHQQ
	>rna-XR_001271588.2_9 [502 - 651] gene-LOC106352368 name=LOC106352368 seq_id=NC_027765.2 type=exon
	MNLSFLRKTIPVDFYDFPGLSLEVPLTKDQAFYNIGCDTSNQWLVLDYLR
	>rna-XR_001271588.2_10 [724 - 807] gene-LOC106352368 name=LOC106352368 seq_id=NC_027765.2 type=exon
	MIDIWIVLRSCILISLLILASIMSFVHS
	>rna-XR_001271588.2_11 [735 - 815] gene-LOC106352368 name=LOC106352368 seq_id=NC_027765.2 type=exon
	MDCIKIMHINFLTYTCIHYVFCSFVRI
	>rna-XR_001271588.2_12 [887 - 970] gene-LOC106352368 name=LOC106352368 seq_id=NC_027765.2 type=exon
	MQTVYSLIFFMNVCNMQQSFLLLEFFCR
	>rna-XR_001271588.2_13 [921 - 971] gene-LOC106352368 name=LOC106352368 seq_id=NC_027765.2 type=exon
	MFVICSSLFYCLNFFVG
	>rna-XR_001274070.2_1 [19 - 87] gene-LOC106368582 name=LOC106368582 seq_id=NC_027765.2 type=exon
	MKLYKLKCSVQFNASADICSLCM
	>rna-XR_001274070.2_2 [39 - 131] gene-LOC106368582 name=LOC106368582 seq_id=NC_027765.2 type=exon
	MFCSIQCLGRHLFPLHVREIKKATKAIKKDL
	>rna-XR_001274070.2_3 [56 - 148] gene-LOC106368582 name=LOC106368582 seq_id=NC_027765.2 type=exon
	MPRQTSVPFACKRDKESDKSHKERSLELDEL
	>rna-XR_001274070.2_4 [156 - 278] gene-LOC106368582 name=LOC106368582 seq_id=NC_027765.2 type=exon
	MSWGKRNTQKLTEESEHTKVNCICCICFSCVLTALSVRFPC
	>rna-XR_001274070.2_5 [224 - 391] gene-LOC106368582 name=LOC106368582 seq_id=NC_027765.2 type=exon
	MLHLLLLRAHCSFCQIPVLISLACPCSSLSQSLSLSHTQALSLSLDYFQTKVRIYH
	>rna-XR_001274070.2_6 [396 - 464] gene-LOC106368582 name=LOC106368582 seq_id=NC_027765.2 type=exon
	MMACSCVLILVRSDCMRCEIFKL
	>rna-XR_001274070.2_7 [599 - 637] gene-LOC106368582 name=LOC106368582 seq_id=NC_027765.2 type=exon
	MYILLFIFFFLSF
	>rna-XR_001274070.2_8 [690 - 722] gene-LOC106368582 name=LOC106368582 seq_id=NC_027765.2 type=exon
	MRSSYHLIFRE
	>rna-XR_001274070.2_9 [493 - 777] gene-LOC106368582 name=LOC106368582 seq_id=NC_027765.2 type=exon
	MRNIEKAISLCVNAWLSEIKHGNLVLIRLVLNFSIHVYIIVYFFLFVFLIPCSILYSHIN
	NMSFDSCDHHIISFFVNKMLQDNFVIIRMSRWHFS
	>rna-XR_001274070.2_10 [811 - 849] gene-LOC106368582 name=LOC106368582 seq_id=NC_027765.2 type=exon
	MRHIISLLYKELC
	>rna-XR_001274070.2_11 [846 - 914] gene-LOC106368582 name=LOC106368582 seq_id=NC_027765.2 type=exon
	MLVYTSAKKKLCRYIVSCNYLFL
	>rna-XR_001274070.2_12 [926 - 991] gene-LOC106368582 name=LOC106368582 seq_id=NC_027765.2 type=exon
	MLHFMNLFMLMKIQLYVALLIT
	>rna-XR_001274070.2_13 [1048 - 1113] gene-LOC106368582 name=LOC106368582 seq_id=NC_027765.2 type=exon
	MFLFSLAFQTHILNATNTAYNV
	>rna-XR_001274070.2_14 [1113 - 1172] gene-LOC106368582 name=LOC106368582 seq_id=NC_027765.2 type=exon
	MSFWYWCHMLMCHVFPLLYC
	>rna-XR_001274070.2_15 [1150 - 1218] gene-LOC106368582 name=LOC106368582 seq_id=NC_027765.2 type=exon
	MSFRFCTVKDVEKYCCLSTKYQY
	>rna-XR_001274070.2_16 [1088 - 1225] gene-LOC106368582 name=LOC106368582 seq_id=NC_027765.2 type=exon
	MQLIQPIMYEFLVLVPHVDVSCLSAFVLLRMLKNIVVCRQNINTSN
	>rna-XR_001274070.2_17 [1330 - 1368] gene-LOC106368582 name=LOC106368582 seq_id=NC_027765.2 type=exon
	MHHIRIDISIAIV
	>rna-XR_001274070.2_18 [1274 - 1384] gene-LOC106368582 name=LOC106368582 seq_id=NC_027765.2 type=exon
	MSCWAEIVMMPVRILWSSECIIYESIYPLQLSDAFIS
	>rna-XR_001274070.2_19 [1436 - 1459] gene-LOC106368582 name=LOC106368582 seq_id=NC_027765.2 type=exon
	MEYMRMDF
	>rna-XR_001274070.2_20 [1468 - 1497] gene-LOC106368582 name=LOC106368582 seq_id=NC_027765.2 type=exon
	MISEVLAPAL
	>rna-XR_001274070.2_21 [1519 - 1536] gene-LOC106368582 name=LOC106368582 seq_id=NC_027765.2 type=exon
	MSSLEI
	>rna-XR_001274070.2_22 [1371 - 1562] gene-LOC106368582 name=LOC106368582 seq_id=NC_027765.2 type=exon
	MLLLVKAVFDLDICRENEIWRTWNTCVWIFELDDFRGVGSSFINLLVCVHELSRDLEYKS
	ICKL
	>rna-XR_001274070.2_23 [1572 - 1595] gene-LOC106368582 name=LOC106368582 seq_id=NC_027765.2 type=exon
	MQIHILYR
	>rna-XR_002659848.1_1 [12 - 29] gene-LOC106407493 name=LOC106407493 seq_id=NC_027773.2 type=exon
	MADEQE
	>rna-XR_002659848.1_2 [78 - 110] gene-LOC106407493 name=LOC106407493 seq_id=NC_027773.2 type=exon
	MRSDRRIHWTR
	>rna-XR_002659848.1_3 [144 - 185] gene-LOC106407493 name=LOC106407493 seq_id=NC_027773.2 type=exon
	MCYTRATSGKAGLN
	>rna-XR_002659848.1_4 [125 - 205] gene-LOC106407493 name=LOC106407493 seq_id=NC_027773.2 type=exon
	MSPISPDVLHTRHLWKSWFKLNCFFFL
	>rna-XR_002659848.1_5 [604 - 669] gene-LOC106407493 name=LOC106407493 seq_id=NC_027773.2 type=exon
	MQALLCVHNSACACSPLFLSVA
	>rna-XR_002659848.1_6 [790 - 834] gene-LOC106407493 name=LOC106407493 seq_id=NC_027773.2 type=exon
	MWIRLTPFRYQFHYV
	>rna-XR_002659848.1_7 [830 - 862] gene-LOC106407493 name=LOC106407493 seq_id=NC_027773.2 type=exon
	MCRYYLLFFVC
	>rna-XR_002659848.1_8 [895 - 915] gene-LOC106407493 name=LOC106407493 seq_id=NC_027773.2 type=exon
	MFVLFFS
	>rna-XR_002659848.1_9 [873 - 983] gene-LOC106407493 name=LOC106407493 seq_id=NC_027773.2 type=exon
	MGACTLKNVCSFLFLRKRMFVLKQFGGEKLRFKYVGL
	>rna-XR_002659848.1_10 [983 - 1102] gene-LOC106407493 name=LOC106407493 seq_id=NC_027773.2 type=exon
	MININLKCVLFVFFLVDLGKARVLMIINPHRYMMQVNLGL
	>rna-XR_002659848.1_11 [973 - 1191] gene-LOC106407493 name=LOC106407493 seq_id=NC_027773.2 type=exon
	MWVYDKYKFKVCFICVFSSGSRKSASFDDHKSPPLHDASEPRIMKLFFSFFCLLSFQTRC
	GFQVSDFQLIYFM
	>rna-XR_002659848.1_12 [1149 - 1214] gene-LOC106407493 name=LOC106407493 seq_id=NC_027773.2 type=exon
	MWLSGFRFSVDLFHVDSSSVPF
	>rna-XR_002659848.1_13 [1239 - 1262] gene-LOC106407493 name=LOC106407493 seq_id=NC_027773.2 type=exon
	MNKFAMKH
	>rna-XR_002659848.1_14 [1436 - 1504] gene-LOC106407493 name=LOC106407493 seq_id=NC_027773.2 type=exon
	MKRLNPRPNAFPCKFLHFCFQLC
	>rna-XR_002659848.1_15 [1461 - 1517] gene-LOC106407493 name=LOC106407493 seq_id=NC_027773.2 type=exon
	MLFLANFFIFASNFARKLI
	>rna-XR_002659848.1_16 [1586 - 1603] gene-LOC106407493 name=LOC106407493 seq_id=NC_027773.2 type=exon
	MVPKEF
	>rna-XR_002659848.1_17 [1554 - 1676] gene-LOC106407493 name=LOC106407493 seq_id=NC_027773.2 type=exon
	MLVSVEMLYLIWYQRSFKMLVYTEIVYFLLPKVYKPFFFFY
	>rna-XR_002659848.1_18 [1681 - 1731] gene-LOC106407493 name=LOC106407493 seq_id=NC_027773.2 type=exon
	MIGIMKVSEFTIFHLIY
	>rna-XR_002659848.1_19 [1736 - 1759] gene-LOC106407493 name=LOC106407493 seq_id=NC_027773.2 type=exon
	MIGIILLV
	>rna-XR_002659848.1_20 [1772 - 1837] gene-LOC106407493 name=LOC106407493 seq_id=NC_027773.2 type=exon
	MLVKLNLCLFMIYFYQNQVLCN
	>rna-XR_002659848.1_21 [1887 - 1916] gene-LOC106407493 name=LOC106407493 seq_id=NC_027773.2 type=exon
	MQYNEFNLYV
	>rna-XR_002659848.1_22 [1912 - 1959] gene-LOC106407493 name=LOC106407493 seq_id=NC_027773.2 type=exon
	MYKFVFPLHNIDSIGP
	>rna-XR_002659848.1_23 [2005 - 2022] gene-LOC106407493 name=LOC106407493 seq_id=NC_027773.2 type=exon
	MIEVWK
	>rna-XR_002659848.1_24 [2032 - 2070] gene-LOC106407493 name=LOC106407493 seq_id=NC_027773.2 type=exon
	METEMLEIIYLSS
	>rna-XR_002659848.1_25 [2074 - 2097] gene-LOC106407493 name=LOC106407493 seq_id=NC_027773.2 type=exon
	MVGLKLPD
	>rna-XR_002659848.1_26 [2115 - 2216] gene-LOC106407493 name=LOC106407493 seq_id=NC_027773.2 type=exon
	MLLVLCLFDLYLCCASLFLMSSKRFLSTGCLVLQ
	>rna-XR_002659848.1_27 [2201 - 2263] gene-LOC106407493 name=LOC106407493 seq_id=NC_027773.2 type=exon
	MPGFAMILSSYSYKRHYSNGV
	>rna-XR_002659848.1_28 [2293 - 2334] gene-LOC106407493 name=LOC106407493 seq_id=NC_027773.2 type=exon
	MNEYLFDYTRSIYR
	>rna-XR_002659848.1_29 [2356 - 2379] gene-LOC106407493 name=LOC106407493 seq_id=NC_027773.2 type=exon
	MKSNCKSS
	>rna-XR_002659848.1_30 [2637 - 2654] gene-LOC106407493 name=LOC106407493 seq_id=NC_027773.2 type=exon
	MVHHTI
	>rna-XR_002659848.1_31 [2783 - 2809] gene-LOC106407493 name=LOC106407493 seq_id=NC_027773.2 type=exon
	MSIALFDCK
	>rna-XR_002659848.1_32 [2904 - 2978] gene-LOC106407493 name=LOC106407493 seq_id=NC_027773.2 type=exon
	MRSISSGEMITQIYINFKVGSVATR
	>rna-XR_002659848.1_33 [2990 - 3007] gene-LOC106407493 name=LOC106407493 seq_id=NC_027773.2 type=exon
	MVLWKY
	>rna-XR_002659848.1_34 [2983 - 3093] gene-LOC106407493 name=LOC106407493 seq_id=NC_027773.2 type=exon
	MIDGTMEVLAKISRVFNLLIVEKHHLSLIPFCIMCAF
Severe infection level	>rna-XR_001273710.2_1 [15 - 113] gene-LOC106366705 name=LOC106366705 seq_id=NW_019168592.1 type=exon
	MFDYDYKLRHLSSLFFPCNVLVSPPPQNPTSDN
	>rna-XR_001273710.2_2 [70 - 129] gene-LOC106366705 name=LOC106366705 seq_id=NW_019168592.1 type=exon
	MFWSLLLLKTQLLITKIFIG
	>rna-XR_001273710.2_3 [215 - 238] gene-LOC106366705 name=LOC106366705 seq_id=NW_019168592.1 type=exon
	MDLFLCWF
	>rna-XR_001273710.2_4 [229 - 246] gene-LOC106366705 name=LOC106366705 seq_id=NW_019168592.1 type=exon
	MLVLRG
	>rna-XR_001273710.2_5 [327 - 395] gene-LOC106366705 name=LOC106366705 seq_id=NW_019168592.1 type=exon
	MYPGPAEAQVQGGVDPGSKFFFS
	>rna-XR_001273710.2_6 [319 - 399] gene-LOC106366705 name=LOC106366705 seq_id=NW_019168592.1 type=exon
	MYQCIQGRLRRRYKGAWTQGPNFFFHN
	>rna-XR_001273710.2_7 [410 - 439] gene-LOC106366705 name=LOC106366705 seq_id=NW_019168592.1 type=exon
	MELDFQKKKI
	>rna-XR_001273710.2_8 [530 - 559] gene-LOC106366705 name=LOC106366705 seq_id=NW_019168592.1 type=exon
	MSWPWMYLSN
	>rna-XR_001273710.2_9 [582 - 629] gene-LOC106366705 name=LOC106366705 seq_id=NW_019168592.1 type=exon
	MCFLLFFMDACMYVCV
	>rna-XR_001273710.2_10 [611 - 637] gene-LOC106366705 name=LOC106366705 seq_id=NW_019168592.1 type=exon
	MHVCVCISV
	>rna-XR_001273710.2_11 [607 - 690] gene-LOC106366705 name=LOC106366705 seq_id=NW_019168592.1 type=exon
	MHACMCVYKCIDSGTRSSCGFIHSNHQQ
	>rna-XR_001273710.2_12 [690 - 794] gene-LOC106366705 name=LOC106366705 seq_id=NW_019168592.1 type=exon
	MNLSFLRKTIPAVDFYDFPLLSLEGYKYAGGRTCQ
	>rna-XR_001273710.2_13 [788 - 817] gene-LOC106366705 name=LOC106366705 seq_id=NW_019168592.1 type=exon
	MSIISPKKTF
	>rna-XR_001273710.2_14 [850 - 879] gene-LOC106366705 name=LOC106366705 seq_id=NW_019168592.1 type=exon
	MATSRIILNN
	>rna-XR_001273710.2_15 [990 - 1103] gene-LOC106366705 name=LOC106366705 seq_id=NW_019168592.1 type=exon
	MRYLLSTAMLVYQSIQLVNLKFVTKVNNLLSFFAVCIL
	>rna-XR_001273710.2_16 [1116 - 1145] gene-LOC106366705 name=LOC106366705 seq_id=NW_019168592.1 type=exon
	MKGYDQLIQF
	>rna-XR_001273710.2_17 [1126 - 1161] gene-LOC106366705 name=LOC106366705 seq_id=NW_019168592.1 type=exon
	MINSFSFDYNVY
	>rna-XR_001273710.2_18 [1236 - 1274] gene-LOC106366705 name=LOC106366705 seq_id=NW_019168592.1 type=exon
	MPARLWEEKTQKK
	>rna-XR_001273710.2_19 [1154 - 1339] gene-LOC106366705 name=LOC106366705 seq_id=NW_019168592.1 type=exon
	MYIKNFSAFQQKLTMEDQNKPFTTTRGHAGQIVGRKNSEKVRMRKKKGSLVTGTFQNQIF
	QK
	>rna-XR_001273710.2_20 [1393 - 1443] gene-LOC106366705 name=LOC106366705 seq_id=NW_019168592.1 type=exon
	MFQSLAKDGTIQVMKKS
	>rna-XR_001273710.2_21 [1503 - 1556] gene-LOC106366705 name=LOC106366705 seq_id=NW_019168592.1 type=exon
	MRGIFKTSLITYFRLTLL
	>rna-XR_001273710.2_22 [1561 - 1578] gene-LOC106366705 name=LOC106366705 seq_id=NW_019168592.1 type=exon
	MILAIV
	>rna-XR_001273710.2_23 [1585 - 1653] gene-LOC106366705 name=LOC106366705 seq_id=NW_019168592.1 type=exon
	MLQITDHVEIEIKVMIIVYESQR
	>rna-XR_001273710.2_24 [1713 - 1751] gene-LOC106366705 name=LOC106366705 seq_id=NW_019168592.1 type=exon
	MANTTSLFLDSAH
	>rna-XR_001273710.2_25 [1754 - 1786] gene-LOC106366705 name=LOC106366705 seq_id=NW_019168592.1 type=exon
	MYVWVIAKLPV
	>rna-XR_001273710.2_26 [1814 - 1846] gene-LOC106366705 name=LOC106366705 seq_id=NW_019168592.1 type=exon
	MFSHLKQMNSI
	>rna-XR_001273710.2_27 [1898 - 1918] gene-LOC106366705 name=LOC106366705 seq_id=NW_019168592.1 type=exon
	MLLNLRI
	>rna-XR_001273710.2_28 [1950 - 1976] gene-LOC106366705 name=LOC106366705 seq_id=NW_019168592.1 type=exon
	MFGKKQNFL
	>rna-XR_001273707.2_1 [14 - 112] gene-LOC106366705 name=LOC106366705 seq_id=NW_019168592.1 type=exon
	MFDYDYKLRHLSSLFFPCNVLVSPPPQNPTSDN
	>rna-XR_001273707.2_2 [69 - 128] gene-LOC106366705 name=LOC106366705 seq_id=NW_019168592.1 type=exon
	MFWSLLLLKTQLLITKIFIG
	>rna-XR_001273707.2_3 [214 - 237] gene-LOC106366705 name=LOC106366705 seq_id=NW_019168592.1 type=exon
	MDLFLCWF
	>rna-XR_001273707.2_4 [228 - 245] gene-LOC106366705 name=LOC106366705 seq_id=NW_019168592.1 type=exon
	MLVLRG
	>rna-XR_001273707.2_5 [326 - 394] gene-LOC106366705 name=LOC106366705 seq_id=NW_019168592.1 type=exon
	MYPGPAEAQVQGGVDPGSKFFFS
	>rna-XR_001273707.2_6 [318 - 398] gene-LOC106366705 name=LOC106366705 seq_id=NW_019168592.1 type=exon
	MYQCIQGRLRRRYKGAWTQGPNFFFHN
	>rna-XR_001273707.2_7 [409 - 438] gene-LOC106366705 name=LOC106366705 seq_id=NW_019168592.1 type=exon
	MELDFQKKKI
	>rna-XR_001273707.2_8 [529 - 558] gene-LOC106366705 name=LOC106366705 seq_id=NW_019168592.1 type=exon
	MSWPWMYLSN
	>rna-XR_001273707.2_9 [581 - 628] gene-LOC106366705 name=LOC106366705 seq_id=NW_019168592.1 type=exon
	MCFLLFFMDACMYVCV
	>rna-XR_001273707.2_10 [610 - 636] gene-LOC106366705 name=LOC106366705 seq_id=NW_019168592.1 type=exon
	MHVCVCISV
	>rna-XR_001273707.2_11 [606 - 689] gene-LOC106366705 name=LOC106366705 seq_id=NW_019168592.1 type=exon
	MHACMCVYKCIDSGTRSSCGFIHSNHQQ
	>rna-XR_001273707.2_12 [762 - 794] gene-LOC106366705 name=LOC106366705 seq_id=NW_019168592.1 type=exon
	MPHHQLEGGKC
	>rna-XR_001273707.2_13 [689 - 868] gene-LOC106366705 name=LOC106366705 seq_id=NW_019168592.1 type=exon
	MNLSFLRKTIPAVDFYDFPLLSLENATSSVRRGQMLTRQFLYLKTQMFRLFENFLMGQLL
	>rna-XR_001273707.2_14 [913 - 984] gene-LOC106366705 name=LOC106366705 seq_id=NW_019168592.1 type=exon
	MFDHFVNDGLLGEFNYNEKPIYVL
	>rna-XR_001273707.2_15 [1112 - 1180] gene-LOC106366705 name=LOC106366705 seq_id=NW_019168592.1 type=exon
	MIAITTIKPLSPLLRIDFIIHPW
	>rna-XR_001273707.2_16 [1232 - 1261] gene-LOC106366705 name=LOC106366705 seq_id=NW_019168592.1 type=exon
	MSIISPKKTF
	>rna-XR_001273707.2_17 [1177 - 1269] gene-LOC106366705 name=LOC106366705 seq_id=NW_019168592.1 type=exon
	MVTPECLKPRVINTLEAGHVNNLSQKNILNF
	>rna-XR_001273707.2_18 [1294 - 1323] gene-LOC106366705 name=LOC106366705 seq_id=NW_019168592.1 type=exon
	MATSRIILNN
	>rna-XR_001273707.2_19 [1434 - 1547] gene-LOC106366705 name=LOC106366705 seq_id=NW_019168592.1 type=exon
	MRYLLSTAMLVYQSIQLVNLKFVTKVNNLLSFFAVCIL
	>rna-XR_001273707.2_20 [1560 - 1589] gene-LOC106366705 name=LOC106366705 seq_id=NW_019168592.1 type=exon
	MKGYDQLIQF
	>rna-XR_001273707.2_21 [1570 - 1605] gene-LOC106366705 name=LOC106366705 seq_id=NW_019168592.1 type=exon
	MINSFSFDYNVY
	>rna-XR_001273707.2_22 [1680 - 1718] gene-LOC106366705 name=LOC106366705 seq_id=NW_019168592.1 type=exon
	MPARLWEEKTQKK
	>rna-XR_001273707.2_23 [1598 - 1783] gene-LOC106366705 name=LOC106366705 seq_id=NW_019168592.1 type=exon
	MYIKNFSAFQQKLTMEDQNKPFTTTRGHAGQIVGRKNSEKVRMRKKKGSLVTGTFQNQIF
	QK
	>rna-XR_001273707.2_24 [1837 - 1887] gene-LOC106366705 name=LOC106366705 seq_id=NW_019168592.1 type=exon
	MFQSLAKDGTIQVMKKS
	>rna-XR_001273707.2_25 [1947 - 2000] gene-LOC106366705 name=LOC106366705 seq_id=NW_019168592.1 type=exon
	MRGIFKTSLITYFRLTLL
	>rna-XR_001273707.2_26 [2005 - 2022] gene-LOC106366705 name=LOC106366705 seq_id=NW_019168592.1 type=exon
	MILAIV
	>rna-XR_001273707.2_27 [2029 - 2097] gene-LOC106366705 name=LOC106366705 seq_id=NW_019168592.1 type=exon
	MLQITDHVEIEIKVMIIVYESQR
	>rna-XR_001273707.2_28 [2157 - 2195] gene-LOC106366705 name=LOC106366705 seq_id=NW_019168592.1 type=exon
	MANTTSLFLDSAH
	>rna-XR_001273707.2_29 [2198 - 2230] gene-LOC106366705 name=LOC106366705 seq_id=NW_019168592.1 type=exon
	MYVWVIAKLPV
	>rna-XR_001273707.2_30 [2258 - 2290] gene-LOC106366705 name=LOC106366705 seq_id=NW_019168592.1 type=exon
	MFSHLKQMNSI
	>rna-XR_001273707.2_31 [2342 - 2362] gene-LOC106366705 name=LOC106366705 seq_id=NW_019168592.1 type=exon
	MLLNLRI
	>rna-XR_001273707.2_32 [2394 - 2420] gene-LOC106366705 name=LOC106366705 seq_id=NW_019168592.1 type=exon
	MFGKKQNFL
	>rna-XR_001273708.2_1 [13 - 111] gene-LOC106366705 name=LOC106366705 seq_id=NW_019168592.1 type=exon
	MFDYDYKLRHLSSLFFPCNVLVSPPPQNPTSDN
	>rna-XR_001273708.2_2 [68 - 127] gene-LOC106366705 name=LOC106366705 seq_id=NW_019168592.1 type=exon
	MFWSLLLLKTQLLITKIFIG
	>rna-XR_001273708.2_3 [213 - 236] gene-LOC106366705 name=LOC106366705 seq_id=NW_019168592.1 type=exon
	MDLFLCWF
	>rna-XR_001273708.2_4 [227 - 244] gene-LOC106366705 name=LOC106366705 seq_id=NW_019168592.1 type=exon
	MLVLRG
	>rna-XR_001273708.2_5 [325 - 393] gene-LOC106366705 name=LOC106366705 seq_id=NW_019168592.1 type=exon
	MYPGPAEAQVQGGVDPGSKFFFS
	>rna-XR_001273708.2_6 [317 - 397] gene-LOC106366705 name=LOC106366705 seq_id=NW_019168592.1 type=exon
	MYQCIQGRLRRRYKGAWTQGPNFFFHN
	>rna-XR_001273708.2_7 [408 - 437] gene-LOC106366705 name=LOC106366705 seq_id=NW_019168592.1 type=exon
	MELDFQKKKI
	>rna-XR_001273708.2_8 [528 - 557] gene-LOC106366705 name=LOC106366705 seq_id=NW_019168592.1 type=exon
	MSWPWMYLSN
	>rna-XR_001273708.2_9 [580 - 627] gene-LOC106366705 name=LOC106366705 seq_id=NW_019168592.1 type=exon
	MCFLLFFMDACMYVCV
	>rna-XR_001273708.2_10 [609 - 635] gene-LOC106366705 name=LOC106366705 seq_id=NW_019168592.1 type=exon
	MHVCVCISV
	>rna-XR_001273708.2_11 [605 - 688] gene-LOC106366705 name=LOC106366705 seq_id=NW_019168592.1 type=exon
	MHACMCVYKCIDSGTRSSCGFIHSNHQQ
	>rna-XR_001273708.2_12 [761 - 793] gene-LOC106366705 name=LOC106366705 seq_id=NW_019168592.1 type=exon
	MPHHQLEGGKC
	>rna-XR_001273708.2_13 [688 - 867] gene-LOC106366705 name=LOC106366705 seq_id=NW_019168592.1 type=exon
	MNLSFLRKTIPAVDFYDFPLLSLENATSSVRRGQMLTRQFLYLKTQMFRLFENFLMGQLL
	>rna-XR_001273708.2_14 [912 - 983] gene-LOC106366705 name=LOC106366705 seq_id=NW_019168592.1 type=exon
	MFDHFVNDGLLGEFNYNEKPIYVL
	>rna-XR_001273708.2_15 [1111 - 1179] gene-LOC106366705 name=LOC106366705 seq_id=NW_019168592.1 type=exon
	MIAITTIKPLSPLLRIDFIIHPW
	>rna-XR_001273708.2_16 [1231 - 1260] gene-LOC106366705 name=LOC106366705 seq_id=NW_019168592.1 type=exon
	MSIISPKKTF
	>rna-XR_001273708.2_17 [1176 - 1268] gene-LOC106366705 name=LOC106366705 seq_id=NW_019168592.1 type=exon
	MVTPECLKPRVINTLEAGHVNNLSQKNILNF
	>rna-XR_001273708.2_18 [1293 - 1322] gene-LOC106366705 name=LOC106366705 seq_id=NW_019168592.1 type=exon
	MATSRIILNN
	>rna-XR_001273708.2_19 [1490 - 1528] gene-LOC106366705 name=LOC106366705 seq_id=NW_019168592.1 type=exon
	MPARLWEEKTQKK
	>rna-XR_001273708.2_20 [1450 - 1593] gene-LOC106366705 name=LOC106366705 seq_id=NW_019168592.1 type=exon
	MEDQNKPFTTTRGHAGQIVGRKNSEKVRMRKKKGSLVTGTFQNQIFQK
	>rna-XR_001273708.2_21 [1647 - 1697] gene-LOC106366705 name=LOC106366705 seq_id=NW_019168592.1 type=exon
	MFQSLAKDGTIQVMKKS
	>rna-XR_001273708.2_22 [1757 - 1810] gene-LOC106366705 name=LOC106366705 seq_id=NW_019168592.1 type=exon
	MRGIFKTSLITYFRLTLL
	>rna-XR_001273708.2_23 [1815 - 1832] gene-LOC106366705 name=LOC106366705 seq_id=NW_019168592.1 type=exon
	MILAIV
	>rna-XR_001273708.2_24 [1839 - 1907] gene-LOC106366705 name=LOC106366705 seq_id=NW_019168592.1 type=exon
	MLQITDHVEIEIKVMIIVYESQR
	>rna-XR_001273708.2_25 [1967 - 2005] gene-LOC106366705 name=LOC106366705 seq_id=NW_019168592.1 type=exon
	MANTTSLFLDSAH
	>rna-XR_001273708.2_26 [2008 - 2040] gene-LOC106366705 name=LOC106366705 seq_id=NW_019168592.1 type=exon
	MYVWVIAKLPV
	>rna-XR_001273708.2_27 [2068 - 2100] gene-LOC106366705 name=LOC106366705 seq_id=NW_019168592.1 type=exon
	MFSHLKQMNSI
	>rna-XR_001273708.2_28 [2152 - 2172] gene-LOC106366705 name=LOC106366705 seq_id=NW_019168592.1 type=exon
	MLLNLRI
	>rna-XR_001273708.2_29 [2204 - 2230] gene-LOC106366705 name=LOC106366705 seq_id=NW_019168592.1 type=exon
	MFGKKQNFL
	>rna-XR_002658214.1_1 [243 - 296] gene-LOC111205685 name=LOC111205685 seq_id=NC_027758.2 type=exon
	MFIMFPLKPTHKPSNIHI
	>rna-XR_002658214.1_2 [377 - 400] gene-LOC111205685 name=LOC111205685 seq_id=NC_027758.2 type=exon
	MKSIASGV
	>rna-XR_002658214.1_3 [415 - 438] gene-LOC111205685 name=LOC111205685 seq_id=NC_027758.2 type=exon
	MTKAFLDI
	>rna-XR_002658214.1_4 [465 - 506] gene-LOC111205685 name=LOC111205685 seq_id=NC_027758.2 type=exon
	MSIKFLVYVYMNYV
	>rna-XR_002658214.1_5 [502 - 549] gene-LOC111205685 name=LOC111205685 seq_id=NC_027758.2 type=exon
	MFRNFCFFSYASSLFS
	>rna-XR_002658214.1_6 [530 - 595] gene-LOC111205685 name=LOC111205685 seq_id=NC_027758.2 type=exon
	MHLHYFLSVLYLLMFYLVLSRY
	>rna-XR_002658214.1_7 [676 - 708] gene-LOC111205685 name=LOC111205685 seq_id=NC_027758.2 type=exon
	MLKNIGVSIYQ
	>rna-XR_002658214.1_8 [770 - 853] gene-LOC111205685 name=LOC111205685 seq_id=NC_027758.2 type=exon
	MLSRSNCSISLFTLTKSCNDSFARCVHG
	>rna-XR_002658214.1_9 [825 - 887] gene-LOC111205685 name=LOC111205685 seq_id=NC_027758.2 type=exon
	MIALQGVYMDRTCQLSKRVKL
	>rna-XR_002658214.1_10 [963 - 1016] gene-LOC111205685 name=LOC111205685 seq_id=NC_027758.2 type=exon
	MLSFLVQQKNIEQHISLH
	>rna-XR_002658214.1_11 [1067 - 1099] gene-LOC111205685 name=LOC111205685 seq_id=NC_027758.2 type=exon
	MHLFLSDLSNF
	>rna-XR_002658214.1_12 [1190 - 1210] gene-LOC111205685 name=LOC111205685 seq_id=NC_027758.2 type=exon
	MFYFWMT
	>rna-XR_002658214.1_13 [1150 - 1233] gene-LOC111205685 name=LOC111205685 seq_id=NC_027758.2 type=exon
	MFQSISNFVNIRINVLLLDDVNKNLFTL
	>rna-XR_002658214.1_14 [1245 - 1280] gene-LOC111205685 name=LOC111205685 seq_id=NC_027758.2 type=exon
	MITDRFMGCKMN
	>rna-XR_002658214.1_15 [1340 - 1468] gene-LOC111205685 name=LOC111205685 seq_id=NC_027758.2 type=exon
	MLLQLLMFLTTASSSLHSSICFLMYVTVRGWDCSWRATILGRS
	>rna-XR_002658214.1_16 [1471 - 1518] gene-LOC111205685 name=LOC111205685 seq_id=NC_027758.2 type=exon
	MISSQWRLYFTSMYSL
	>rna-XR_002658214.1_17 [1413 - 1550] gene-LOC111205685 name=LOC111205685 seq_id=NC_027758.2 type=exon
	MSLSEAGIALGELQSLVDLNDFISVATIFHIDVLSVTPTLISQKKA
	>rna-XR_002658214.1_18 [1602 - 1646] gene-LOC111205685 name=LOC111205685 seq_id=NC_027758.2 type=exon
	MMIMMMMKKACVYII
	>rna-XR_002658214.1_19 [1651 - 1695] gene-LOC111205685 name=LOC111205685 seq_id=NC_027758.2 type=exon
	MLRPISKPNMFSTCL
[truncated: 749 more rows]

## Sheet: Potential regulated miRNA
Weak infection level	>rna-XR_001273710.2 gene-LOC106366705 name=LOC106366705 seq_id=NW_019168592.1 type=exon
	GTGTGGGTGTGAAGATGTTCGATTACGATTACAAGTTGAGACACCTGTCGTCTCTTTTCTTTCCTTGTAATGTTTTggtctctcctcctcctcaaaaccCAACTTCtgataactaaaattttcattGGATAGCAATTCATTTCTCTGTATTTCCgtaattaattaataagtttCGATTATATAGCTAGGGTTGATGTGAGATTTGTATATCTAGATGGATCTATTTCTATGTTGGTTTTGAGAGGCTGAAGCTGCCAGCATGATCTGGTAATCGCTACATAcgacatatatacatatacatactAATTTAATTTACACATGTATCAATGTATCCAGGGCCGGCTGAGGCGCAGGTACAAGGGGGCGTGGACCCAgggtccaaattttttttttcataat…
	>rna-XR_001273707.2 gene-LOC106366705 name=LOC106366705 seq_id=NW_019168592.1 type=exon
	TGTGGGTGTGAAGATGTTCGATTACGATTACAAGTTGAGACACCTGTCGTCTCTTTTCTTTCCTTGTAATGTTTTggtctctcctcctcctcaaaaccCAACTTCtgataactaaaattttcattGGATAGCAATTCATTTCTCTGTATTTCCgtaattaattaataagtttCGATTATATAGCTAGGGTTGATGTGAGATTTGTATATCTAGATGGATCTATTTCTATGTTGGTTTTGAGAGGCTGAAGCTGCCAGCATGATCTGGTAATCGCTACATAcgacatatatacatatacatactAATTTAATTTACACATGTATCAATGTATCCAGGGCCGGCTGAGGCGCAGGTACAAGGGGGCGTGGACCCAgggtccaaattttttttttcataatt…
	>rna-XR_001273708.2 gene-LOC106366705 name=LOC106366705 seq_id=NW_019168592.1 type=exon
	GTGGGTGTGAAGATGTTCGATTACGATTACAAGTTGAGACACCTGTCGTCTCTTTTCTTTCCTTGTAATGTTTTggtctctcctcctcctcaaaaccCAACTTCtgataactaaaattttcattGGATAGCAATTCATTTCTCTGTATTTCCgtaattaattaataagtttCGATTATATAGCTAGGGTTGATGTGAGATTTGTATATCTAGATGGATCTATTTCTATGTTGGTTTTGAGAGGCTGAAGCTGCCAGCATGATCTGGTAATCGCTACATAcgacatatatacatatacatactAATTTAATTTACACATGTATCAATGTATCCAGGGCCGGCTGAGGCGCAGGTACAAGGGGGCGTGGACCCAgggtccaaattttttttttcataatta…
	>rna-XR_002661141.1 gene-LOC111209711 name=LOC111209711 seq_id=NC_027775.2 type=exon
	TCAAGTATGAAGATCTTTGGAGTCTTGTGCGTTGCGTCTTTTAGCTCATGAAACGGAACtctatatatcaattaaaatgtTCTGTCCCCTTTGCATGTAagagagataaagaaaccgACAAAAGCCATAAAGAAAGGGGACTCTCTGAATGAGCAAGAGATAAGGCTCCTCTTATCTTCTCATCAgatctttgtttctttgtttcttctttttttttttgcttttttggttatgttttttCTCGATTTAGACAAAAACCCTAGACTTGATTTTCCAAAAGGTGTCTTAAATAGTATCTCTTTCCTCTATTCATATGTGTGTATTTTCTCTCTATGGTTCCTTGTCTACTTTAATCTCTGGAGATGGAAGAACTGCGAGTGAATGAGTTgggacaaaaga…
	>rna-XR_002661140.1 gene-LOC111209711 name=LOC111209711 seq_id=NC_027775.2 type=exon
	TCAAGTATGAAGATCTTTGGAGTCTTGTGCGTTGCGTCTTTTAGCTCATGAAACGGAACtctatatatcaattaaaatgtTCTGTCCCCTTTGCATGTAagagagataaagaaaccgACAAAAGCCATAAAGAAAGGGGACTCTCTGAATGAGCAAGAGATAAGGCTCCTCTTATCTTCTCATCAgatctttgtttctttgtttcttctttttttttttgcttttttggttatgttttttCTCGATTTAGACAAAAACCCTAGACTTGATTTTCCAAAAGGTGTCTTAAATAGTATCTCTTTCCTCTATTCATATATCTCTGGAGATGGAAGAACTGCGAGTGAATGAGTTgggacaaaagaaaaacatagcaACTGACAGAAGAGAGTGAGCACACAA…
	>rna-XR_002661139.1 gene-LOC111209711 name=LOC111209711 seq_id=NC_027775.2 type=exon
	TCAAGTATGAAGATCTTTGGAGTCTTGTGCGTTGCGTCTTTTAGCTCATGAAACGGAACtctatatatcaattaaaatgtTCTGTCCCCTTTGCATGTAagagagataaagaaaccgACAAAAGCCATAAAGAAAGGGGACTCTCTGAATGAGCAAGAGATAAGGCTCCTCTTATCTTCTCATCAgatctttgtttctttgtttcttctttttttttttgcttttttggttatgttttttCTCGATTTAGACAAAAACCCTAGACTTGATTTTCCAAAAGATCTCTGGAGATGGAAGAACTGCGAGTGAATGAGTTgggacaaaagaaaaacatagcaACTGACAGAAGAGAGTGAGCACACAAAGGTAATTTGCATATACTGCATTTACTTCTCTTGC…
	>rna-XR_001284807.2 gene-LOC106424115 name=LOC106424115 seq_id=NC_027764.2 type=exon
	tctctctctctctctcccctttaTATACCGACTGTGTCGCCATTGGCAGAAAGCAATGCTCATCAAACAGCTAGATCTCTGAGAATTAAAATACGATCGAATTGAGGATTTTCTCTTGTGTTCACTAGGGTTTGGAGAGATCTGTGAGAACGGGGAGTGAGGATGAGAGATTTTGAGTCTTTTTGCACAGAAAATCTATGtgggttttatttaattataagttGCTAGAAGACAGAGAAGAAATGCAACAGAGAAAACTGACAGAAGAGAGTGAGCACTTGCAAGGCACTGTTATGTGTCAATAACTTTGCGTGTGCGTGCTCACCTCTCTTTCTGTCAGTTGCCTGACTTctcgctttctctctctcttctctcaacTTTGTTGGCCTTTTTATCATC…
	>rna-XR_001278178.2 gene-LOC106390022 name=LOC106390022 seq_id=NC_027769.2 type=exon
	AATACATAAAAAGGGTGGCTTATATGAACAACAGaattaaatgtttaattcaTCAAATTAATAGAAAGGGAAAAAGTAGTCACACACAACACATATGGCCTTTTCGCCGGCTGTGTTACACACGCGCCACCTTTGAAAAGCCGGTTTACAGACCAGGTGTGCTCTTCTACCCAGTCACTATAAAACACGTGTTTGAAACTCTGTAGAACTCTTAGCAACGAGCCAAGGATTGGacaattcaaaacaaaacaaaagaaagaagatctctctctctctctctcccccctTTATATACGGACTATGTCGCCATTGGCAGAAAGCAATACTCATCAAACAGCTAGATCTCTGTGTTCACTAGGGTTTGGAGAGATCTGTGAGAACGGGGAGTGAGGATGAGAG…
	>rna-XR_001271588.2 gene-LOC106352368 name=LOC106352368 seq_id=NC_027765.2 type=exon
	ATGCTCGATTACGATTACAAGTTGAGACACTTGTCGtctcttttctttccttttaatGTTTTGCTCTCTCCTCCCCCTCAAAACCCAACTTCtgataactaaaattttcattGGATAGCAATTCATATTCTCTGTATCTTCCgtaattaattaataagtttCGAGTATATAGCTAGGGTTGATGTGAGATTTGTATATCTAGATGGATCTATTTCTATGTTGGTTTTGGGAGGCTGAAGCTGCCAGCATGATCTGGTAATCGCTACATACgacatatatacatacacatgcTAATTTAATTTACTTCCACATATATCAATGTatctctcaaataatatataatcttttttttttttgctaacattTGGATCATATATAATCTTAGTgttaaaaatgtgt…
	>rna-XR_001274070.2 gene-LOC106368582 name=LOC106368582 seq_id=NC_027765.2 type=exon
	ACCATTTTACCTCATAAGatgaaactctataaattaaaatgttctGTTCAATTCAATGCCTCGGCAGACATCTGTTCCCTTTGCATGTAAGAGAGATAAAGAAAGCGACAAAAGCCATAAAGAAAGATCTCTAGAGTTGGATGAATTGTGAGTGAATGAGCTGGGGCAAAAGAAACACACAGAAACTGACAGAAGAGAGTGAGCACACAAAAGTAAATTGCATATGTTGCATTTGCTTCTCTTGCGTGCTCACTGCTCTTTCTGTCAGATTCCCGTGCTGATCTCTTTGGCCTGTCCTTGTTCCTCTTTGtctcagtctctctctctctcacatacacaagctctctctctctctcttgattaTTTCCAAACTAAGGTAAGAATATACCACTGAAATGA…
	>rna-XR_002659848.1 gene-LOC106407493 name=LOC106407493 seq_id=NC_027773.2 type=exon
	TGTTAAGCATAATGGCCGACGAACAAGAATGATTGTTTGAACTCTTAACAACATACACACAAAAGGGTGGCTTATAGATGAGGTCTGACAGAAGAATTCACTGGACAAGATAAGTCGCAGACATATGAGTCCTATTTCGCCCGATGTGTTACACACGCGCCACCTCTGGAAAAGCTGGTTTAAAttgaactgttttttttttttgtaaaactaaatTGAACTGTTTATTTGACTGACCAGGTGTGCTCTTCTATCCACACAATAGAACACGTGTCTGAAACCctgttaaaagttaaaaactctCTTAACTGAGATTGGACCCTAAAAAAgacaattaaaagaaaagtgaaaaaaaCCACAATCTCCGCTATCTTCAaatcctttctctctctttatata…
Moderate infection level	>rna-XR_001273710.2 gene-LOC106366705 name=LOC106366705 seq_id=NW_019168592.1 type=exon
	GTGTGGGTGTGAAGATGTTCGATTACGATTACAAGTTGAGACACCTGTCGTCTCTTTTCTTTCCTTGTAATGTTTTggtctctcctcctcctcaaaaccCAACTTCtgataactaaaattttcattGGATAGCAATTCATTTCTCTGTATTTCCgtaattaattaataagtttCGATTATATAGCTAGGGTTGATGTGAGATTTGTATATCTAGATGGATCTATTTCTATGTTGGTTTTGAGAGGCTGAAGCTGCCAGCATGATCTGGTAATCGCTACATAcgacatatatacatatacatactAATTTAATTTACACATGTATCAATGTATCCAGGGCCGGCTGAGGCGCAGGTACAAGGGGGCGTGGACCCAgggtccaaattttttttttcataat…
	>rna-XR_001273707.2 gene-LOC106366705 name=LOC106366705 seq_id=NW_019168592.1 type=exon
	TGTGGGTGTGAAGATGTTCGATTACGATTACAAGTTGAGACACCTGTCGTCTCTTTTCTTTCCTTGTAATGTTTTggtctctcctcctcctcaaaaccCAACTTCtgataactaaaattttcattGGATAGCAATTCATTTCTCTGTATTTCCgtaattaattaataagtttCGATTATATAGCTAGGGTTGATGTGAGATTTGTATATCTAGATGGATCTATTTCTATGTTGGTTTTGAGAGGCTGAAGCTGCCAGCATGATCTGGTAATCGCTACATAcgacatatatacatatacatactAATTTAATTTACACATGTATCAATGTATCCAGGGCCGGCTGAGGCGCAGGTACAAGGGGGCGTGGACCCAgggtccaaattttttttttcataatt…
	>rna-XR_001273708.2 gene-LOC106366705 name=LOC106366705 seq_id=NW_019168592.1 type=exon
	GTGGGTGTGAAGATGTTCGATTACGATTACAAGTTGAGACACCTGTCGTCTCTTTTCTTTCCTTGTAATGTTTTggtctctcctcctcctcaaaaccCAACTTCtgataactaaaattttcattGGATAGCAATTCATTTCTCTGTATTTCCgtaattaattaataagtttCGATTATATAGCTAGGGTTGATGTGAGATTTGTATATCTAGATGGATCTATTTCTATGTTGGTTTTGAGAGGCTGAAGCTGCCAGCATGATCTGGTAATCGCTACATAcgacatatatacatatacatactAATTTAATTTACACATGTATCAATGTATCCAGGGCCGGCTGAGGCGCAGGTACAAGGGGGCGTGGACCCAgggtccaaattttttttttcataatta…
	>rna-XR_002658214.1 gene-LOC111205685 name=LOC111205685 seq_id=NC_027758.2 type=exon
	aagaaacattttatttttaaaggtaATTATATTGTTCcagttataaataaatttattcatatttgCCTTCAGATCCAACTTTCGTTCCCTCTTTCGAATTTTTTTAAGTACCAGCAAAGTTTGGTTAATTCTTTCCCCCTCTATATATTTGTACCTCCACTCCTCTTACATCTCCACAAATCCTTGACAAAGAATAATTCTTCGGTTTCATTTTCCTCCCATCCAAATAAAATTACATACATATGTTTATTATGTTCCCTTTAAAACCGACGCATAAGCCATCCAACATTCATATTTAGAAGTCTTGTATACGTAACGTATGGAATAATAGTCGTGCCTGGCTCCCTGTATACCACAAGCAAACACCGATCTCATTATGAAATCGATCGCTAGTGGTGT…
	>rna-XR_002660319.1 gene-LOC111208321 name=LOC111208321 seq_id=NC_027757.2 type=exon
	CCATTTATACACACGTCTCCAGAAATCCTTGACAAAGAATAACTCCATTTTTTCTCTGGTTCCATTTCTCCCACCCAAATGAAACTacagaaacatttttttttctattggaATCAAGACCGAACGACTATATAAGCCATCCATGATTCATATTTGGAAGTCTGGTATACACCACACATATATATGATACGAAGTCATGCCTGGCTCCCTGTATGCCACAAGTAAATACCGATCTCATTATGAAATCGGACACTAGTGGCGTACAGAGTAGTCAAGCATAACCACTGATATTCTTGATATATGAGTACTTTGTTTTTGTAACACAAGATATATATGTGTGGATGGTGGCTAGCTATAAGATATATGTTATATGCATGGATTATGTCTAGAACTGTTATA…
	>rna-XR_002660886.1 gene-LOC111209134 name=LOC111209134 seq_id=NC_027774.2 type=exon
	TTGGTTAATTCTTTCCCCCTCTATATATTTGTACCTCCACTCGTCTTACATCTCCACAAATCCTTGACAAAGAATAATTCTTCGGTTTCATTTTCCTCCCCATCCAAATAAAATTACATACACATGTTTATTATGTTCCCTTTACAACCGACGCATAAGCCATCCAACATTCATATTTAGAAGTcttgtatacatatatactacGTATGGAATAATAGTCGTGCCTGGCTCCCTGTATACCACAAGAAAACACCGATCTCATTATGAAATCGATCGCTAGTGGTGTATAGAGTAGTCAAGCATGACCAAAGCTTTTCTTGATATATAAGTACTTTGTCTTTGTAACGCATAATGTCTATAAAATTTCTGGTATATGTATGCATGaattatgtttagaaa…
	>rna-XR_001272838.2 gene-LOC106360797 name=LOC106360797 seq_id=NC_027774.2 type=exon
	GAAAAAACACCATTGCTcccacttagagagagagagagagagaaagaaagagagttcTTCACAGGCTCAGAGCAACTAGAGAAAGGATCCAAAGGGATCGCATTGATCCTAATTAAGCTGAATTTATTCCCaaataattgttatatttttctcaatCTAAAGAAAAAGTCCCAAAAATCTGCTTCGTTTTCAGGATCATGCGATCTATTTGGATTCATCCTTTGGTTGCTTCCATTTTGGTCAAAGTGTTTCACTGCCGGGGACTTCACCGGCGGGAAAATCTCCAGTGGGTCGATCCATGCCTCTTGGTCAGCGCAGGGAACTAGCCAACTTGGTGCAAAACAGTTGACGAATGGGGACCCAAAAACTCGTGATCTTCCTCCTTTAGCAAGGGAGTCA…
	>rna-XR_001278112.2 gene-LOC106389769 name=LOC106389769 seq_id=NC_027774.2 type=exon
	CCTCATAAGatgaaactctataaattaaaatgttctGTTCAATTCAATGCCTCGCCAGACATCTGTTCCCTTTGCATGTAAGAGAGATAAAGAAAGCGACAAAAGCCATAAAGAAAGATAAGACTCTTTGAATGATAGAGAGATAAGGCTCCTCTTATCTTCTCAACAgatctttgtttctttcttcttttcttttcgttttttccttttttggttATGTTTGTTCTCGATTTAGACAAAAAAACCCTAGACTTGATCTTCCAAAGGGTGTCTGAATTTCTTCCCTTTGTACAGATTTGTATTCTTTCTCTTTGTGGTTCTTTGCCTTCTTTAGTTAAAACTTAGATCTAACCATTAATCTCTTATCTTTTCACTGACCCAATGACTCTTATTCTTCGT…
	>rna-XR_002664208.1 gene-LOC111215065 name=LOC111215065 seq_id=NC_027760.2 type=exon
	CTTTGGAGTCTTGTGCGTTGCGTCTTTTAGCTCATGAAACGAAACtctatatatcaattaaaatgtTCTGTCCCCTTTGCATGTAAGAGAGATAAACAAACCGACAAAAGCCATAAAGAAAGATCTCTGGAGATGGAAGAACTGCGAGTGAATGAGTTgggacaaaagaaaaacatagcaACTGACAGAAGAGAGTGAGCACACAAAAGTAATCTGCATATACTGCATTTGCTTCTCTTGCGTGCTCACTGCTCTTTCTGTCAGATTCTAGTGCTGATCTCTTTGGCCTGTCCTTGTTCTCTTTgtctcaatctctctctctctctctcacatacGCAATCTCTCTCTACTTCTCTTGTTCATCTCAAATAAAGGTAAGCTTAATATGCGATTTAAACG…
	>rna-XR_002664209.1 gene-LOC111215065 name=LOC111215065 seq_id=NC_027760.2 type=exon
	CTCCTCTTATCTTCTCATCAgatctttgtttctttcttcttcttctttttttttgcttttttggttatgtttttCTCGATTTAGACAAAAACCCTAGACTTGATTTTCCAAAAGATCTCTGGAGATGGAAGAACTGCGAGTGAATGAGTTgggacaaaagaaaaacatagcaACTGACAGAAGAGAGTGAGCACACAAAAGTAATCTGCATATACTGCATTTGCTTCTCTTGCGTGCTCACTGCTCTTTCTGTCAGATTCTAGTGCTGATCTCTTTGGCCTGTCCTTGTTCTCTTTgtctcaatctctctctctctctctcacatacGCAATCTCTCTCTACTTCTCTTGTTCATCTCAAATAAAGGTAAGCTTAATATGCGATTTAAACGATGGCTTG…
	>rna-XR_002664210.1 gene-LOC111215065 name=LOC111215065 seq_id=NC_027760.2 type=exon
	AGTATCTCTTTCCTCTATTcatgtttgtgtgttttctcTCTATGGTTCCTTGTCTACTTTAATCTCTGGAGATGGAAGAACTGCGAGTGAATGAGTTgggacaaaagaaaaacatagcaACTGACAGAAGAGAGTGAGCACACAAAAGTAATCTGCATATACTGCATTTGCTTCTCTTGCGTGCTCACTGCTCTTTCTGTCAGATTCTAGTGCTGATCTCTTTGGCCTGTCCTTGTTCTCTTTgtctcaatctctctctctctctctcacatacGCAATCTCTCTCTACTTCTCTTGTTCATCTCAAATAAAGGTAAGCTTAATATGCGATTTAAACGATGGCTTGTTCCTTGTATAGATCTGATTGCATGCGAGGTGATAGCTTTAAACTTTCACCAT…
	>rna-XR_002653174.1 gene-LOC111199259 name=LOC111199259 seq_id=NC_027763.2 type=exon
	ctctctctctcttctctctctatctctctgctTTAGATCTCAGTCTCATCAGGTCTTATCTGCTTAGTAACTGGCTTCCACGATCTGGTTACATGTATATATGTCATTCCCTTTTTgcaaatcaaaattttgtatgGTTTAATCTTATTTTGCTGTTTTGGCTGTATATATCAGAGGGTGTTTTTTACATCCCCCTCTCTCATCTCTATCGCTTAGGGTTTCGCTTCTTCtgtgttttagttttgttttgttccaaTTAAGTAGAAGAGAGTAAAATTCCGTAATTTTTTTACTTCTCATCTAATCATACCAAGCCATTTCGAATAGTTCGTCAAGTTTCTCCtctcatatgtatatatatatatatgtattgtatATGCATAACTATGTATTTTGTAC…
	>rna-XR_002663545.1 gene-LOC106438439 name=LOC106438439 seq_id=NC_027759.2 type=exon
	aacattttgtCACAAGTATAAAGcatacattatataatttatttatttattttatatacacacacacttCTCTTGTATATTCACACAAAGATGTATGCTTTCTCTTtgtctctcctctctcctctctctccatctctctgtTTTAGATCTCATCAGGTCTTCTCTGCTTAGTATGTGGCTTATCTGGTAACATGTATTATATAcgtcatacttttttttttgcaaatcaaaatttgtgttgttttgtttcattttactGTTTTAGCTGTATAAAATACCAAGTTCAGACTTCAGAGTGTATTCAAGATTTTTcattctcctctctctcttagGGTTTcgcttcttctgtttttttttctttttttggtctgGTTCCAATTAAGTAGAAGAGAGTAAAAT…
	>rna-XR_002664046.1 gene-LOC111214693 name=LOC111214693 seq_id=NC_027759.2 type=exon
	TCCTCTTACACCTATCTGCAAAAATCCTTAAAGAACAATCGCCATTTTTTCTCTGATTTCATTTCTCTCCTAATCCCAAATGAACTACGAACACATCTTTATTCTTTACCTACGTATAAGCCATCCAACATTCATTTATGGAAATCTTTTTtctacaatatattatatatgtgtgtgtgctCTTATGGTCGTGCCTGGCTCCCTGTATGCCACAAGTATATACCGATCTCGTTACGAAATCTGTGGCTAGTGGCGTACAGAGTAGTCAAGCATGACCAAAGCTTTTCTTGGTGTATAAGTAGTATTTTGTCTTTATAACAACATATAGCATGTATGGTGTTTTATATGCATTTTATTATACGCATGGATTATGTTTTATTGTACACatcttcattattt…
	>rna-XR_002661141.1 gene-LOC111209711 name=LOC111209711 seq_id=NC_027775.2 type=exon
	TCAAGTATGAAGATCTTTGGAGTCTTGTGCGTTGCGTCTTTTAGCTCATGAAACGGAACtctatatatcaattaaaatgtTCTGTCCCCTTTGCATGTAagagagataaagaaaccgACAAAAGCCATAAAGAAAGGGGACTCTCTGAATGAGCAAGAGATAAGGCTCCTCTTATCTTCTCATCAgatctttgtttctttgtttcttctttttttttttgcttttttggttatgttttttCTCGATTTAGACAAAAACCCTAGACTTGATTTTCCAAAAGGTGTCTTAAATAGTATCTCTTTCCTCTATTCATATGTGTGTATTTTCTCTCTATGGTTCCTTGTCTACTTTAATCTCTGGAGATGGAAGAACTGCGAGTGAATGAGTTgggacaaaaga…
	>rna-XR_002661140.1 gene-LOC111209711 name=LOC111209711 seq_id=NC_027775.2 type=exon
	TCAAGTATGAAGATCTTTGGAGTCTTGTGCGTTGCGTCTTTTAGCTCATGAAACGGAACtctatatatcaattaaaatgtTCTGTCCCCTTTGCATGTAagagagataaagaaaccgACAAAAGCCATAAAGAAAGGGGACTCTCTGAATGAGCAAGAGATAAGGCTCCTCTTATCTTCTCATCAgatctttgtttctttgtttcttctttttttttttgcttttttggttatgttttttCTCGATTTAGACAAAAACCCTAGACTTGATTTTCCAAAAGGTGTCTTAAATAGTATCTCTTTCCTCTATTCATATATCTCTGGAGATGGAAGAACTGCGAGTGAATGAGTTgggacaaaagaaaaacatagcaACTGACAGAAGAGAGTGAGCACACAA…
	>rna-XR_002661139.1 gene-LOC111209711 name=LOC111209711 seq_id=NC_027775.2 type=exon
	TCAAGTATGAAGATCTTTGGAGTCTTGTGCGTTGCGTCTTTTAGCTCATGAAACGGAACtctatatatcaattaaaatgtTCTGTCCCCTTTGCATGTAagagagataaagaaaccgACAAAAGCCATAAAGAAAGGGGACTCTCTGAATGAGCAAGAGATAAGGCTCCTCTTATCTTCTCATCAgatctttgtttctttgtttcttctttttttttttgcttttttggttatgttttttCTCGATTTAGACAAAAACCCTAGACTTGATTTTCCAAAAGATCTCTGGAGATGGAAGAACTGCGAGTGAATGAGTTgggacaaaagaaaaacatagcaACTGACAGAAGAGAGTGAGCACACAAAGGTAATTTGCATATACTGCATTTACTTCTCTTGC…
	>rna-XR_002661288.1 gene-LOC111209882 name=LOC111209882 seq_id=NC_027775.2 type=exon
	CAAAGCCTGGCCATTGATTAAGACACGTTTCTCTTTCCGACGAACCATAACCAAGCGTTTCTCATCCGTACTCACTTTTCtctcctccctctctctctctgtttctcacCTTCTTTTCTGCTTCCAAAGAATCTAGCTTCAGTCCTAGGGTTTTACGATTCTCTATTTAACTTCCCTCTTCTTTCGATAGCGAGCAAACCGAGCCGACACATATACATTCTTTGCATGCAAGAGAGTGATAATACATATAAGATTAAAGGAAATAAACTCATCTGTTATCCGTTCCAGATTCAACCCTGAATGTATCTCCATCACCGATTTTTCTAgatccagtttttttttttctagattcAGTTCTTTCTAGACTAGGTtcttttgaaaccctaatttacaTTATTG…
	>rna-XR_001272553.2 gene-LOC106359524 name=LOC106359524 seq_id=NC_027764.2 type=exon
	aaaactaaacatgTTTTGCAAGTGAATGGGAAAGAGATATCCTTAGGGACGAGAATCTAGCCAGCCTTGAGCATTTGCAAGTTTATGCGCTCGTAGACAAGCTTAATACACTACATGGAAGCATACGTTTGATTTCCGACCAATGGATCTATCCAAATTGTCCATCAACCACGTTTACGACCCATTTCTCCACCTCAACCAACACCAACGGAACATTTTGAACCGAGCTCAATGGTTGCAAACTTACATATTATGCCTTTGGAGTTGGTTATAAACTTTAGTCATTTGAATGTTGGGCTTCTGATAAATGGGTTTAACCCATGTTTCTAAATATTTGTGCACACTATATTTCGGGCCGTAGAGATGTCTCTCCCGTTGGCATTCAGCTAGGGTTTCTAA…
	>rna-XR_001284807.2 gene-LOC106424115 name=LOC106424115 seq_id=NC_027764.2 type=exon
	tctctctctctctctcccctttaTATACCGACTGTGTCGCCATTGGCAGAAAGCAATGCTCATCAAACAGCTAGATCTCTGAGAATTAAAATACGATCGAATTGAGGATTTTCTCTTGTGTTCACTAGGGTTTGGAGAGATCTGTGAGAACGGGGAGTGAGGATGAGAGATTTTGAGTCTTTTTGCACAGAAAATCTATGtgggttttatttaattataagttGCTAGAAGACAGAGAAGAAATGCAACAGAGAAAACTGACAGAAGAGAGTGAGCACTTGCAAGGCACTGTTATGTGTCAATAACTTTGCGTGTGCGTGCTCACCTCTCTTTCTGTCAGTTGCCTGACTTctcgctttctctctctcttctctcaacTTTGTTGGCCTTTTTATCATC…
	>rna-XR_001272725.2 gene-LOC106360231 name=LOC106360231 seq_id=NC_027764.2 type=exon
	AGTCCCATAGACTTTGTAAAATAGccaaactcttcttcttttctcccTTGATTCTTCTCCTTACTACTTTTGACGTTGCCTAAGAGTTTTGTAAGGATCCAGTGACCTTTCCCGGTAAAGTAAGTTTTTTGTGCCGACAATCAtttcttatataatttgatttgatgTATAGTTGATGCTACTCTTTTGTTCTCGATTTTCTGGAGCTGACTAGTGATAATCGGGTGAGACTGGTGTTGATGTAAAGGTAACGCGAGATATTAGTGCGGTTCAATCAAATAGTCGTACTCTTAGCTATTAGAGATCGGTTTTGTTCGATTGAGCCGTGCCAATATCACGCATAAAACCAACATGGCAAAGATGGTTATTACCCTTAAAAGTATATTGTCAGTCTTCTTT…
	>rna-XR_002657824.1 gene-LOC111205331 name=LOC111205331 seq_id=NC_027770.2 type=exon
	TTCACTTTCCTCTCAAGTCTCtttatcatttttcatttttagtaacaagaaaaaaagaaagtagaGAAGAATCTGTAAAGCTCAGGAGGGATAGCGCCATCATATATAATCTCATTCACATCGATATTTTTGGCGCTGTCCATCCTGAGTTTCATTGGCTCTCCTTACTGCAGTGAAAAAGGCTTTCACAGATACATCAACAACttcaaaaatcaatatcaatTTTGTTTAGAGTTTCACTTTAGCTCTTTTAATATCACCACCACCTTTTTCTTgctttcttcctttttctctttGATCAAAGAAAATTAGTCTCTTTCTCCGGTGAAGTCAGCCACCAACAGGTATTCGAGAAGTAAATAATGTCAAAGGATGGATAGGTCTTCTTCTGTATATTTT…
	>rna-XR_001279212.2 gene-LOC106395336 name=LOC106395336 seq_id=NC_027770.2 type=exon
	ttgtcttttttctttttcatatgtGCCAAGTAAAAAACCGGCTTAACGGTGAGTACCATGTTCTCTCTTCACGTACAATTCAATTCTATTTTCAGTCATTTGCcttctttgattcttttattttttatttttgatgttgAGTATGGGATAATAAGCAACGGATCGGCGAGAACGTATGAATATCTTACTAACGTAAAGACAATACGAGATATTGGTGCGGTTCAATCAGAAATCCACACTCTTTTGTTGTAGAGATCGGTTTGTTTGATTGAGCCGTGCCAATATCACGAGTGTAATTGGCCTCCACCATGCTAGCTGGTGTTCatcaagGTTCTGGAGTTCGGATAACACAAGAATGAGCGTAATCCTTGAATATAGACATCGATATACCTAATCTGC…
	>rna-XR_002652935.1 gene-LOC111198781 name=LOC111198781 seq_id=NC_027762.2 type=exon
	AACAAAACTTTGCCAGATATGGTAactgttctctctctctctatctctccttcttctttctatcttttcaattgagagagagagaagagaaggtccGAGGAGGAGGACTAAAAAGATGTTACGGCGGCCTCTGACTCGCTTGGTGCAGGTCGGGAACTGATTGGCTGACACCGCCACGTGGCTTTCCATGGTTGGCTTGTGAGCAGGGATCGGATCCCGCCTTGTATCAAGTGAATCCGAGTCCgacgtgaaaaaaaaaaaaaagtccacaGCTTTCAGATCTGACACACTCATCAAATATCTTGTAATTGGGGATTTATTCTTCTTTGTTAatcttttatttagttttgacGCATGATGATTAATGGCTATGCTCTTAAAATTTCAGGATCTAAGGTG…
	>rna-XR_002655830.1 gene-LOC106375391 name=LOC106375391 seq_id=NC_027768.2 type=exon
	CCATATTGAGTGAGTGTTTTGGGACAAGTTTTAGAGAAACGCAAAGAAACTGACAGAAGAGAGTGAGCACACAAAGGCACTTTGCATGTTCGATGCATTTGCTTCTCTTGCGTGCTCACTGCTCTATCTGTCAGGTTCCGGCACCGATTCTTTTTGGTCCGTTCACGTTTTCTTCTTTGATTGTGTTCCCATCTCTCTCATAGTCTCACCCACTTTCTTTCTCCATAGGTTTTGATTGTCTATGCCAGAGATGAACGCAGTGTTTACGGTAACCTATTAACTTGTACTTGGGAtgttgatttagggtttttgtgTCATGTTTTATCAGTTGATTGCCGCAGGTTtcacatatgtatatatgaatgaTCTAGTTTAGAGTCAGGATATTAAACAATGTTT…
	>rna-XR_001275257.2 gene-LOC106375391 name=LOC106375391 seq_id=NC_027768.2 type=exon
	CCATATTGAGTGAGTGTTTTGGGACAAGTTTTAGAGAAACGCAAAGAAACTGACAGAAGAGAGTGAGCACACAAAGGCACTTTGCATGTTCGATGCATTTGCTTCTCTTGCGTGCTCACTGCTCTATCTGTCAGGTTCCGGCACCGATTCTTTTTGGTCCGTTCACGTTTTCTTCTTTGATTGTGTTCCCATCTCTCTCATAGTCTCACCCACTTTCTTTCTCCATAGGTTTTGATTGTCTATGCCAGAGATGAACGCAGTGTTTACGAAAACATGGAGGAGTCGAGCGAGAGGGTTGTTCGGTTAGAGCAACACGATGAGATCACGATGGGCGATGACTTGATTATCCATTCCATCCCACAGGACCTAGCACTAGCAGTATCGGCGATATATGATCTC…
	>rna-XR_002656669.1 gene-LOC111204292 name=LOC111204292 seq_id=NC_027769.2 type=exon
	ACGAAGAACATTATTGCTGgtttaaaagagagaaaaatatctTCGAGGGTAGAGGACCTCGACAGGGTGGACATGAGAACACATGTGTATTCAAAGGCTGTAATGACGCCACGTCACTGTAACGTACATCTCTCTTTTCATGTGTTCTCAGGTCACCCCTGCTGAGCTCTTTCTCTACCATCCATCTTTATCAATGCTCGGTGGCTTCACTCATTCACCAAATGGGACAAATAATTCTGGAGTACGTAGTTTCTATCTGCAGTGTGGTTACAAGTTAAATGGgacaaagaagatgaaactCACGTTACGCACCTACCTTAACTTCACAAGTCATCAACACACCTTTACCAAATCATACCATCCACAAATCCCCCCACccaaaaaagagaaacaaaatgg…
	>rna-XR_001278178.2 gene-LOC106390022 name=LOC106390022 seq_id=NC_027769.2 type=exon
	AATACATAAAAAGGGTGGCTTATATGAACAACAGaattaaatgtttaattcaTCAAATTAATAGAAAGGGAAAAAGTAGTCACACACAACACATATGGCCTTTTCGCCGGCTGTGTTACACACGCGCCACCTTTGAAAAGCCGGTTTACAGACCAGGTGTGCTCTTCTACCCAGTCACTATAAAACACGTGTTTGAAACTCTGTAGAACTCTTAGCAACGAGCCAAGGATTGGacaattcaaaacaaaacaaaagaaagaagatctctctctctctctctcccccctTTATATACGGACTATGTCGCCATTGGCAGAAAGCAATACTCATCAAACAGCTAGATCTCTGTGTTCACTAGGGTTTGGAGAGATCTGTGAGAACGGGGAGTGAGGATGAGAG…
	>rna-XR_001271588.2 gene-LOC106352368 name=LOC106352368 seq_id=NC_027765.2 type=exon
	ATGCTCGATTACGATTACAAGTTGAGACACTTGTCGtctcttttctttccttttaatGTTTTGCTCTCTCCTCCCCCTCAAAACCCAACTTCtgataactaaaattttcattGGATAGCAATTCATATTCTCTGTATCTTCCgtaattaattaataagtttCGAGTATATAGCTAGGGTTGATGTGAGATTTGTATATCTAGATGGATCTATTTCTATGTTGGTTTTGGGAGGCTGAAGCTGCCAGCATGATCTGGTAATCGCTACATACgacatatatacatacacatgcTAATTTAATTTACTTCCACATATATCAATGTatctctcaaataatatataatcttttttttttttgctaacattTGGATCATATATAATCTTAGTgttaaaaatgtgt…
	>rna-XR_001274070.2 gene-LOC106368582 name=LOC106368582 seq_id=NC_027765.2 type=exon
	ACCATTTTACCTCATAAGatgaaactctataaattaaaatgttctGTTCAATTCAATGCCTCGGCAGACATCTGTTCCCTTTGCATGTAAGAGAGATAAAGAAAGCGACAAAAGCCATAAAGAAAGATCTCTAGAGTTGGATGAATTGTGAGTGAATGAGCTGGGGCAAAAGAAACACACAGAAACTGACAGAAGAGAGTGAGCACACAAAAGTAAATTGCATATGTTGCATTTGCTTCTCTTGCGTGCTCACTGCTCTTTCTGTCAGATTCCCGTGCTGATCTCTTTGGCCTGTCCTTGTTCCTCTTTGtctcagtctctctctctctcacatacacaagctctctctctctctcttgattaTTTCCAAACTAAGGTAAGAATATACCACTGAAATGA…
	>rna-XR_002659848.1 gene-LOC106407493 name=LOC106407493 seq_id=NC_027773.2 type=exon
	TGTTAAGCATAATGGCCGACGAACAAGAATGATTGTTTGAACTCTTAACAACATACACACAAAAGGGTGGCTTATAGATGAGGTCTGACAGAAGAATTCACTGGACAAGATAAGTCGCAGACATATGAGTCCTATTTCGCCCGATGTGTTACACACGCGCCACCTCTGGAAAAGCTGGTTTAAAttgaactgttttttttttttgtaaaactaaatTGAACTGTTTATTTGACTGACCAGGTGTGCTCTTCTATCCACACAATAGAACACGTGTCTGAAACCctgttaaaagttaaaaactctCTTAACTGAGATTGGACCCTAAAAAAgacaattaaaagaaaagtgaaaaaaaCCACAATCTCCGCTATCTTCAaatcctttctctctctttatata…
Severe infection level	>rna-XR_001273710.2 gene-LOC106366705 name=LOC106366705 seq_id=NW_019168592.1 type=exon
	GTGTGGGTGTGAAGATGTTCGATTACGATTACAAGTTGAGACACCTGTCGTCTCTTTTCTTTCCTTGTAATGTTTTggtctctcctcctcctcaaaaccCAACTTCtgataactaaaattttcattGGATAGCAATTCATTTCTCTGTATTTCCgtaattaattaataagtttCGATTATATAGCTAGGGTTGATGTGAGATTTGTATATCTAGATGGATCTATTTCTATGTTGGTTTTGAGAGGCTGAAGCTGCCAGCATGATCTGGTAATCGCTACATAcgacatatatacatatacatactAATTTAATTTACACATGTATCAATGTATCCAGGGCCGGCTGAGGCGCAGGTACAAGGGGGCGTGGACCCAgggtccaaattttttttttcataat…
	>rna-XR_001273707.2 gene-LOC106366705 name=LOC106366705 seq_id=NW_019168592.1 type=exon
	TGTGGGTGTGAAGATGTTCGATTACGATTACAAGTTGAGACACCTGTCGTCTCTTTTCTTTCCTTGTAATGTTTTggtctctcctcctcctcaaaaccCAACTTCtgataactaaaattttcattGGATAGCAATTCATTTCTCTGTATTTCCgtaattaattaataagtttCGATTATATAGCTAGGGTTGATGTGAGATTTGTATATCTAGATGGATCTATTTCTATGTTGGTTTTGAGAGGCTGAAGCTGCCAGCATGATCTGGTAATCGCTACATAcgacatatatacatatacatactAATTTAATTTACACATGTATCAATGTATCCAGGGCCGGCTGAGGCGCAGGTACAAGGGGGCGTGGACCCAgggtccaaattttttttttcataatt…
	>rna-XR_001273708.2 gene-LOC106366705 name=LOC106366705 seq_id=NW_019168592.1 type=exon
	GTGGGTGTGAAGATGTTCGATTACGATTACAAGTTGAGACACCTGTCGTCTCTTTTCTTTCCTTGTAATGTTTTggtctctcctcctcctcaaaaccCAACTTCtgataactaaaattttcattGGATAGCAATTCATTTCTCTGTATTTCCgtaattaattaataagtttCGATTATATAGCTAGGGTTGATGTGAGATTTGTATATCTAGATGGATCTATTTCTATGTTGGTTTTGAGAGGCTGAAGCTGCCAGCATGATCTGGTAATCGCTACATAcgacatatatacatatacatactAATTTAATTTACACATGTATCAATGTATCCAGGGCCGGCTGAGGCGCAGGTACAAGGGGGCGTGGACCCAgggtccaaattttttttttcataatta…
	>rna-XR_002658214.1 gene-LOC111205685 name=LOC111205685 seq_id=NC_027758.2 type=exon
	aagaaacattttatttttaaaggtaATTATATTGTTCcagttataaataaatttattcatatttgCCTTCAGATCCAACTTTCGTTCCCTCTTTCGAATTTTTTTAAGTACCAGCAAAGTTTGGTTAATTCTTTCCCCCTCTATATATTTGTACCTCCACTCCTCTTACATCTCCACAAATCCTTGACAAAGAATAATTCTTCGGTTTCATTTTCCTCCCATCCAAATAAAATTACATACATATGTTTATTATGTTCCCTTTAAAACCGACGCATAAGCCATCCAACATTCATATTTAGAAGTCTTGTATACGTAACGTATGGAATAATAGTCGTGCCTGGCTCCCTGTATACCACAAGCAAACACCGATCTCATTATGAAATCGATCGCTAGTGGTGT…
	>rna-XR_002660319.1 gene-LOC111208321 name=LOC111208321 seq_id=NC_027757.2 type=exon
	CCATTTATACACACGTCTCCAGAAATCCTTGACAAAGAATAACTCCATTTTTTCTCTGGTTCCATTTCTCCCACCCAAATGAAACTacagaaacatttttttttctattggaATCAAGACCGAACGACTATATAAGCCATCCATGATTCATATTTGGAAGTCTGGTATACACCACACATATATATGATACGAAGTCATGCCTGGCTCCCTGTATGCCACAAGTAAATACCGATCTCATTATGAAATCGGACACTAGTGGCGTACAGAGTAGTCAAGCATAACCACTGATATTCTTGATATATGAGTACTTTGTTTTTGTAACACAAGATATATATGTGTGGATGGTGGCTAGCTATAAGATATATGTTATATGCATGGATTATGTCTAGAACTGTTATA…
	>rna-XR_002660886.1 gene-LOC111209134 name=LOC111209134 seq_id=NC_027774.2 type=exon
	TTGGTTAATTCTTTCCCCCTCTATATATTTGTACCTCCACTCGTCTTACATCTCCACAAATCCTTGACAAAGAATAATTCTTCGGTTTCATTTTCCTCCCCATCCAAATAAAATTACATACACATGTTTATTATGTTCCCTTTACAACCGACGCATAAGCCATCCAACATTCATATTTAGAAGTcttgtatacatatatactacGTATGGAATAATAGTCGTGCCTGGCTCCCTGTATACCACAAGAAAACACCGATCTCATTATGAAATCGATCGCTAGTGGTGTATAGAGTAGTCAAGCATGACCAAAGCTTTTCTTGATATATAAGTACTTTGTCTTTGTAACGCATAATGTCTATAAAATTTCTGGTATATGTATGCATGaattatgtttagaaa…
	>rna-XR_001278112.2 gene-LOC106389769 name=LOC106389769 seq_id=NC_027774.2 type=exon
	CCTCATAAGatgaaactctataaattaaaatgttctGTTCAATTCAATGCCTCGCCAGACATCTGTTCCCTTTGCATGTAAGAGAGATAAAGAAAGCGACAAAAGCCATAAAGAAAGATAAGACTCTTTGAATGATAGAGAGATAAGGCTCCTCTTATCTTCTCAACAgatctttgtttctttcttcttttcttttcgttttttccttttttggttATGTTTGTTCTCGATTTAGACAAAAAAACCCTAGACTTGATCTTCCAAAGGGTGTCTGAATTTCTTCCCTTTGTACAGATTTGTATTCTTTCTCTTTGTGGTTCTTTGCCTTCTTTAGTTAAAACTTAGATCTAACCATTAATCTCTTATCTTTTCACTGACCCAATGACTCTTATTCTTCGT…
	>rna-XR_002664208.1 gene-LOC111215065 name=LOC111215065 seq_id=NC_027760.2 type=exon
	CTTTGGAGTCTTGTGCGTTGCGTCTTTTAGCTCATGAAACGAAACtctatatatcaattaaaatgtTCTGTCCCCTTTGCATGTAAGAGAGATAAACAAACCGACAAAAGCCATAAAGAAAGATCTCTGGAGATGGAAGAACTGCGAGTGAATGAGTTgggacaaaagaaaaacatagcaACTGACAGAAGAGAGTGAGCACACAAAAGTAATCTGCATATACTGCATTTGCTTCTCTTGCGTGCTCACTGCTCTTTCTGTCAGATTCTAGTGCTGATCTCTTTGGCCTGTCCTTGTTCTCTTTgtctcaatctctctctctctctctcacatacGCAATCTCTCTCTACTTCTCTTGTTCATCTCAAATAAAGGTAAGCTTAATATGCGATTTAAACG…
	>rna-XR_002664209.1 gene-LOC111215065 name=LOC111215065 seq_id=NC_027760.2 type=exon
	CTCCTCTTATCTTCTCATCAgatctttgtttctttcttcttcttctttttttttgcttttttggttatgtttttCTCGATTTAGACAAAAACCCTAGACTTGATTTTCCAAAAGATCTCTGGAGATGGAAGAACTGCGAGTGAATGAGTTgggacaaaagaaaaacatagcaACTGACAGAAGAGAGTGAGCACACAAAAGTAATCTGCATATACTGCATTTGCTTCTCTTGCGTGCTCACTGCTCTTTCTGTCAGATTCTAGTGCTGATCTCTTTGGCCTGTCCTTGTTCTCTTTgtctcaatctctctctctctctctcacatacGCAATCTCTCTCTACTTCTCTTGTTCATCTCAAATAAAGGTAAGCTTAATATGCGATTTAAACGATGGCTTG…
	>rna-XR_002664210.1 gene-LOC111215065 name=LOC111215065 seq_id=NC_027760.2 type=exon
	AGTATCTCTTTCCTCTATTcatgtttgtgtgttttctcTCTATGGTTCCTTGTCTACTTTAATCTCTGGAGATGGAAGAACTGCGAGTGAATGAGTTgggacaaaagaaaaacatagcaACTGACAGAAGAGAGTGAGCACACAAAAGTAATCTGCATATACTGCATTTGCTTCTCTTGCGTGCTCACTGCTCTTTCTGTCAGATTCTAGTGCTGATCTCTTTGGCCTGTCCTTGTTCTCTTTgtctcaatctctctctctctctctcacatacGCAATCTCTCTCTACTTCTCTTGTTCATCTCAAATAAAGGTAAGCTTAATATGCGATTTAAACGATGGCTTGTTCCTTGTATAGATCTGATTGCATGCGAGGTGATAGCTTTAAACTTTCACCAT…
	>rna-XR_002664046.1 gene-LOC111214693 name=LOC111214693 seq_id=NC_027759.2 type=exon
	TCCTCTTACACCTATCTGCAAAAATCCTTAAAGAACAATCGCCATTTTTTCTCTGATTTCATTTCTCTCCTAATCCCAAATGAACTACGAACACATCTTTATTCTTTACCTACGTATAAGCCATCCAACATTCATTTATGGAAATCTTTTTtctacaatatattatatatgtgtgtgtgctCTTATGGTCGTGCCTGGCTCCCTGTATGCCACAAGTATATACCGATCTCGTTACGAAATCTGTGGCTAGTGGCGTACAGAGTAGTCAAGCATGACCAAAGCTTTTCTTGGTGTATAAGTAGTATTTTGTCTTTATAACAACATATAGCATGTATGGTGTTTTATATGCATTTTATTATACGCATGGATTATGTTTTATTGTACACatcttcattattt…
	>rna-XR_002661141.1 gene-LOC111209711 name=LOC111209711 seq_id=NC_027775.2 type=exon
	TCAAGTATGAAGATCTTTGGAGTCTTGTGCGTTGCGTCTTTTAGCTCATGAAACGGAACtctatatatcaattaaaatgtTCTGTCCCCTTTGCATGTAagagagataaagaaaccgACAAAAGCCATAAAGAAAGGGGACTCTCTGAATGAGCAAGAGATAAGGCTCCTCTTATCTTCTCATCAgatctttgtttctttgtttcttctttttttttttgcttttttggttatgttttttCTCGATTTAGACAAAAACCCTAGACTTGATTTTCCAAAAGGTGTCTTAAATAGTATCTCTTTCCTCTATTCATATGTGTGTATTTTCTCTCTATGGTTCCTTGTCTACTTTAATCTCTGGAGATGGAAGAACTGCGAGTGAATGAGTTgggacaaaaga…
	>rna-XR_002661140.1 gene-LOC111209711 name=LOC111209711 seq_id=NC_027775.2 type=exon
	TCAAGTATGAAGATCTTTGGAGTCTTGTGCGTTGCGTCTTTTAGCTCATGAAACGGAACtctatatatcaattaaaatgtTCTGTCCCCTTTGCATGTAagagagataaagaaaccgACAAAAGCCATAAAGAAAGGGGACTCTCTGAATGAGCAAGAGATAAGGCTCCTCTTATCTTCTCATCAgatctttgtttctttgtttcttctttttttttttgcttttttggttatgttttttCTCGATTTAGACAAAAACCCTAGACTTGATTTTCCAAAAGGTGTCTTAAATAGTATCTCTTTCCTCTATTCATATATCTCTGGAGATGGAAGAACTGCGAGTGAATGAGTTgggacaaaagaaaaacatagcaACTGACAGAAGAGAGTGAGCACACAA…
	>rna-XR_002661139.1 gene-LOC111209711 name=LOC111209711 seq_id=NC_027775.2 type=exon
	TCAAGTATGAAGATCTTTGGAGTCTTGTGCGTTGCGTCTTTTAGCTCATGAAACGGAACtctatatatcaattaaaatgtTCTGTCCCCTTTGCATGTAagagagataaagaaaccgACAAAAGCCATAAAGAAAGGGGACTCTCTGAATGAGCAAGAGATAAGGCTCCTCTTATCTTCTCATCAgatctttgtttctttgtttcttctttttttttttgcttttttggttatgttttttCTCGATTTAGACAAAAACCCTAGACTTGATTTTCCAAAAGATCTCTGGAGATGGAAGAACTGCGAGTGAATGAGTTgggacaaaagaaaaacatagcaACTGACAGAAGAGAGTGAGCACACAAAGGTAATTTGCATATACTGCATTTACTTCTCTTGC…
	>rna-XR_002661288.1 gene-LOC111209882 name=LOC111209882 seq_id=NC_027775.2 type=exon
	CAAAGCCTGGCCATTGATTAAGACACGTTTCTCTTTCCGACGAACCATAACCAAGCGTTTCTCATCCGTACTCACTTTTCtctcctccctctctctctctgtttctcacCTTCTTTTCTGCTTCCAAAGAATCTAGCTTCAGTCCTAGGGTTTTACGATTCTCTATTTAACTTCCCTCTTCTTTCGATAGCGAGCAAACCGAGCCGACACATATACATTCTTTGCATGCAAGAGAGTGATAATACATATAAGATTAAAGGAAATAAACTCATCTGTTATCCGTTCCAGATTCAACCCTGAATGTATCTCCATCACCGATTTTTCTAgatccagtttttttttttctagattcAGTTCTTTCTAGACTAGGTtcttttgaaaccctaatttacaTTATTG…
	>rna-XR_001272553.2 gene-LOC106359524 name=LOC106359524 seq_id=NC_027764.2 type=exon
	aaaactaaacatgTTTTGCAAGTGAATGGGAAAGAGATATCCTTAGGGACGAGAATCTAGCCAGCCTTGAGCATTTGCAAGTTTATGCGCTCGTAGACAAGCTTAATACACTACATGGAAGCATACGTTTGATTTCCGACCAATGGATCTATCCAAATTGTCCATCAACCACGTTTACGACCCATTTCTCCACCTCAACCAACACCAACGGAACATTTTGAACCGAGCTCAATGGTTGCAAACTTACATATTATGCCTTTGGAGTTGGTTATAAACTTTAGTCATTTGAATGTTGGGCTTCTGATAAATGGGTTTAACCCATGTTTCTAAATATTTGTGCACACTATATTTCGGGCCGTAGAGATGTCTCTCCCGTTGGCATTCAGCTAGGGTTTCTAA…
	>rna-XR_001272725.2 gene-LOC106360231 name=LOC106360231 seq_id=NC_027764.2 type=exon
	AGTCCCATAGACTTTGTAAAATAGccaaactcttcttcttttctcccTTGATTCTTCTCCTTACTACTTTTGACGTTGCCTAAGAGTTTTGTAAGGATCCAGTGACCTTTCCCGGTAAAGTAAGTTTTTTGTGCCGACAATCAtttcttatataatttgatttgatgTATAGTTGATGCTACTCTTTTGTTCTCGATTTTCTGGAGCTGACTAGTGATAATCGGGTGAGACTGGTGTTGATGTAAAGGTAACGCGAGATATTAGTGCGGTTCAATCAAATAGTCGTACTCTTAGCTATTAGAGATCGGTTTTGTTCGATTGAGCCGTGCCAATATCACGCATAAAACCAACATGGCAAAGATGGTTATTACCCTTAAAAGTATATTGTCAGTCTTCTTT…
	>rna-XR_002657824.1 gene-LOC111205331 name=LOC111205331 seq_id=NC_027770.2 type=exon
	TTCACTTTCCTCTCAAGTCTCtttatcatttttcatttttagtaacaagaaaaaaagaaagtagaGAAGAATCTGTAAAGCTCAGGAGGGATAGCGCCATCATATATAATCTCATTCACATCGATATTTTTGGCGCTGTCCATCCTGAGTTTCATTGGCTCTCCTTACTGCAGTGAAAAAGGCTTTCACAGATACATCAACAACttcaaaaatcaatatcaatTTTGTTTAGAGTTTCACTTTAGCTCTTTTAATATCACCACCACCTTTTTCTTgctttcttcctttttctctttGATCAAAGAAAATTAGTCTCTTTCTCCGGTGAAGTCAGCCACCAACAGGTATTCGAGAAGTAAATAATGTCAAAGGATGGATAGGTCTTCTTCTGTATATTTT…
	>rna-XR_001279212.2 gene-LOC106395336 name=LOC106395336 seq_id=NC_027770.2 type=exon
	ttgtcttttttctttttcatatgtGCCAAGTAAAAAACCGGCTTAACGGTGAGTACCATGTTCTCTCTTCACGTACAATTCAATTCTATTTTCAGTCATTTGCcttctttgattcttttattttttatttttgatgttgAGTATGGGATAATAAGCAACGGATCGGCGAGAACGTATGAATATCTTACTAACGTAAAGACAATACGAGATATTGGTGCGGTTCAATCAGAAATCCACACTCTTTTGTTGTAGAGATCGGTTTGTTTGATTGAGCCGTGCCAATATCACGAGTGTAATTGGCCTCCACCATGCTAGCTGGTGTTCatcaagGTTCTGGAGTTCGGATAACACAAGAATGAGCGTAATCCTTGAATATAGACATCGATATACCTAATCTGC…
	>rna-XR_002652935.1 gene-LOC111198781 name=LOC111198781 seq_id=NC_027762.2 type=exon
	AACAAAACTTTGCCAGATATGGTAactgttctctctctctctatctctccttcttctttctatcttttcaattgagagagagagaagagaaggtccGAGGAGGAGGACTAAAAAGATGTTACGGCGGCCTCTGACTCGCTTGGTGCAGGTCGGGAACTGATTGGCTGACACCGCCACGTGGCTTTCCATGGTTGGCTTGTGAGCAGGGATCGGATCCCGCCTTGTATCAAGTGAATCCGAGTCCgacgtgaaaaaaaaaaaaaagtccacaGCTTTCAGATCTGACACACTCATCAAATATCTTGTAATTGGGGATTTATTCTTCTTTGTTAatcttttatttagttttgacGCATGATGATTAATGGCTATGCTCTTAAAATTTCAGGATCTAAGGTG…
	>rna-XR_002655830.1 gene-LOC106375391 name=LOC106375391 seq_id=NC_027768.2 type=exon
	CCATATTGAGTGAGTGTTTTGGGACAAGTTTTAGAGAAACGCAAAGAAACTGACAGAAGAGAGTGAGCACACAAAGGCACTTTGCATGTTCGATGCATTTGCTTCTCTTGCGTGCTCACTGCTCTATCTGTCAGGTTCCGGCACCGATTCTTTTTGGTCCGTTCACGTTTTCTTCTTTGATTGTGTTCCCATCTCTCTCATAGTCTCACCCACTTTCTTTCTCCATAGGTTTTGATTGTCTATGCCAGAGATGAACGCAGTGTTTACGGTAACCTATTAACTTGTACTTGGGAtgttgatttagggtttttgtgTCATGTTTTATCAGTTGATTGCCGCAGGTTtcacatatgtatatatgaatgaTCTAGTTTAGAGTCAGGATATTAAACAATGTTT…
	>rna-XR_001275257.2 gene-LOC106375391 name=LOC106375391 seq_id=NC_027768.2 type=exon
	CCATATTGAGTGAGTGTTTTGGGACAAGTTTTAGAGAAACGCAAAGAAACTGACAGAAGAGAGTGAGCACACAAAGGCACTTTGCATGTTCGATGCATTTGCTTCTCTTGCGTGCTCACTGCTCTATCTGTCAGGTTCCGGCACCGATTCTTTTTGGTCCGTTCACGTTTTCTTCTTTGATTGTGTTCCCATCTCTCTCATAGTCTCACCCACTTTCTTTCTCCATAGGTTTTGATTGTCTATGCCAGAGATGAACGCAGTGTTTACGAAAACATGGAGGAGTCGAGCGAGAGGGTTGTTCGGTTAGAGCAACACGATGAGATCACGATGGGCGATGACTTGATTATCCATTCCATCCCACAGGACCTAGCACTAGCAGTATCGGCGATATATGATCTC…
	>rna-XR_002656669.1 gene-LOC111204292 name=LOC111204292 seq_id=NC_027769.2 type=exon
	ACGAAGAACATTATTGCTGgtttaaaagagagaaaaatatctTCGAGGGTAGAGGACCTCGACAGGGTGGACATGAGAACACATGTGTATTCAAAGGCTGTAATGACGCCACGTCACTGTAACGTACATCTCTCTTTTCATGTGTTCTCAGGTCACCCCTGCTGAGCTCTTTCTCTACCATCCATCTTTATCAATGCTCGGTGGCTTCACTCATTCACCAAATGGGACAAATAATTCTGGAGTACGTAGTTTCTATCTGCAGTGTGGTTACAAGTTAAATGGgacaaagaagatgaaactCACGTTACGCACCTACCTTAACTTCACAAGTCATCAACACACCTTTACCAAATCATACCATCCACAAATCCCCCCACccaaaaaagagaaacaaaatgg…
	>rna-XR_001271588.2 gene-LOC106352368 name=LOC106352368 seq_id=NC_027765.2 type=exon
	ATGCTCGATTACGATTACAAGTTGAGACACTTGTCGtctcttttctttccttttaatGTTTTGCTCTCTCCTCCCCCTCAAAACCCAACTTCtgataactaaaattttcattGGATAGCAATTCATATTCTCTGTATCTTCCgtaattaattaataagtttCGAGTATATAGCTAGGGTTGATGTGAGATTTGTATATCTAGATGGATCTATTTCTATGTTGGTTTTGGGAGGCTGAAGCTGCCAGCATGATCTGGTAATCGCTACATACgacatatatacatacacatgcTAATTTAATTTACTTCCACATATATCAATGTatctctcaaataatatataatcttttttttttttgctaacattTGGATCATATATAATCTTAGTgttaaaaatgtgt…
	>rna-XR_002659848.1 gene-LOC106407493 name=LOC106407493 seq_id=NC_027773.2 type=exon
	TGTTAAGCATAATGGCCGACGAACAAGAATGATTGTTTGAACTCTTAACAACATACACACAAAAGGGTGGCTTATAGATGAGGTCTGACAGAAGAATTCACTGGACAAGATAAGTCGCAGACATATGAGTCCTATTTCGCCCGATGTGTTACACACGCGCCACCTCTGGAAAAGCTGGTTTAAAttgaactgttttttttttttgtaaaactaaatTGAACTGTTTATTTGACTGACCAGGTGTGCTCTTCTATCCACACAATAGAACACGTGTCTGAAACCctgttaaaagttaaaaactctCTTAACTGAGATTGGACCCTAAAAAAgacaattaaaagaaaagtgaaaaaaaCCACAATCTCCGCTATCTTCAaatcctttctctctctttatata…

## Sheet: predicted pathoPEPs genes
Weak infection level	Pldbra_eH_r1s001g00368_3	ATGCCCTTACGAAGGCGGCTACGACCTTGCATTGGGAACGTC
	Pldbra_eH_r1s001g00596_5	ATGTCGACGTTTCTGAAAAAACAT
	Pldbra_eH_r1s002g01101_1	ATGCGTTCGCGTTGCGCCTCGACG
	Pldbra_eH_r1s002g01204_9	ATGCGTCCGTATCGAATACGGTCACCCAGCATC
	Pldbra_eH_r1s003g01485_3	ATGGCGACGTCGAGGAGCGTGTCGAGGTCT
	Pldbra_eH_r1s003g01620_6	ATGCACGTGGCATGTTATTGTACTATCACA
	Pldbra_eH_r1s003g01924_5	ATGAATACATTTGCGCTAGTTCGTTCTCAC
	Pldbra_eH_r1s004g02262_2	ATGTTAGAGCTCTGGTTC
	Pldbra_eH_r1s004g02369_6	ATGTGCGCGCCCATTGTACATTGT
	Pldbra_eH_r1s004g02622_7	ATGCTTGGAATATCGCTCATCGTT
	Pldbra_eH_r1s004g02631_6	ATGTGCTCCCCATATCCGGTATTAACGGCACCCTGT
	Pldbra_eH_r1s005g03020_6	ATGATACCCTGCGATATC
	Pldbra_eH_r1s005g03207_1	ATGCCGCATCGGCAACTGGAGCGAAGACTA
	Pldbra_eH_r1s005g03221_4	ATGCCATCCCACGAACGCGGATCGCGTTGC
	Pldbra_eH_r1s006g03405_4	ATGTGGCGCGTCAGTACC
	Pldbra_eH_r1s007g04078_7	ATGAATCACATGCTAAACGGCGGCGTCTTGGAT
	Pldbra_eH_r1s007g04083_1	ATGTCATGGCCCGACACGCGAAGGCCA
	Pldbra_eH_r1s007g04097_11	ATGCATATTTGCAGATGCGTGATT
	Pldbra_eH_r1s007g04176_5	ATGTTGGTGCAGACCTTGACGCTC
	Pldbra_eH_r1s007g04268_11	ATGCCATACCAACCCTGGCCAAATCGAGACTTTGAAAGCATA
	Pldbra_eH_r1s008g04591_9	ATGCTTCTTTGGGCCTTT
	Pldbra_eH_r1s008g04595_2	ATGAACTCGTGGCCATGGTTGGCGCCCTGTTGC
	Pldbra_eH_r1s009g05284_11	ATGGTGCAGCACGACGTC
	Pldbra_eH_r1s010g05720_6	ATGTTCCCCATGTGTCTC
	Pldbra_eH_r1s010g05765_8	ATGGTTCGTCTGAAAACGCCGACT
	Pldbra_eH_r1s011g05987_1	ATGCGACTCCGCATGGACTAC
	Pldbra_eH_r1s011g06030_26	ATGTTTTCCTCCAGCAAT
	Pldbra_eH_r1s015g07375_3	ATGCTTTATCAACAAACAGACTCC
	Pldbra_eH_r1s016g07800_5	ATGCTGTCCAGAATGCTGGCGAATTCATTG
	Pldbra_eH_r1s017g08231_11	ATGCGCGTGCCGTTGTGTGTA
	Pldbra_eH_r1s017g08386_11	ATGTTCCTAATGTTCTCCTCC
	Pldbra_eH_r1s018g08594_1	ATGCTCGTTCTGCACGGC
	Pldbra_eH_r1s018g08677_3	ATGTTGTCGCCCGTGACGGCACCCTGGCAG
	Pldbra_eH_r1s020g09116_2	ATGAATGGAGTCAAGTCTCCCGAG
	Pldbra_eH_r1s021g09284_16	ATGCCTTCCTGGATACCTGTC
	Pldbra_eH_r1s025g10276_3	ATGGATGGACCGCTCTGCACGTGGCTG
	Pldbra_eH_r1s031g11360_1	ATGCTGCTGCCGACCTGCTGGCCC
	Pldbra_eH_r1s033g11481_8	ATGTTCGGCGTCTGGCGG
	Pldbra_eH_r1s043g12252_9	ATGAATTATGTTGTTTATTTCATTTGCAGT
	Pldbra_eH_r1s046g12334_3	ATGAAACCGTCCATGTCTTCA
Moderate infection level	Pldbra_eH_r1s001g00056_2	ATGACTGCGGGCAGTACAATGGGTTCCGGCCCGACGGTTCGTACGACCGCGACC
	Pldbra_eH_r1s001g00096_4	ATGTTTGTTGCACAAAGCTAC
	Pldbra_eH_r1s001g00098_14	ATGTGCATCAGCCGGCGA
	Pldbra_eH_r1s001g00337_11	ATGCATCTTGGTCAACGATTGTTC
	Pldbra_eH_r1s001g00368_3	ATGCCCTTACGAAGGCGGCTACGACCTTGCATTGGGAACGTC
	Pldbra_eH_r1s001g00517_4	ATGGGCATGTTTCTTGTTCAG
	Pldbra_eH_r1s001g00596_5	ATGTCGACGTTTCTGAAAAAACAT
	Pldbra_eH_r1s001g00616_5	ATGCACACAGTGCACCATCAGGTGCTGGGCAACTCATGC
	Pldbra_eH_r1s001g00682_1	ATGCTGTTGTATACAGCTCACAGT
	Pldbra_eH_r1s001g00731_12	ATGCGGCCCCACCGCTGTGTGATC
	Pldbra_eH_r1s002g01101_1	ATGCGTTCGCGTTGCGCCTCGACG
	Pldbra_eH_r1s002g01141_1	ATGTTTCAAAGGCCGTCG
	Pldbra_eH_r1s002g01204_9	ATGCGTCCGTATCGAATACGGTCACCCAGCATC
	Pldbra_eH_r1s002g01224_3	ATGCCCGGTCTGCGCCAAAACGTTCACAAGACGGGG
	Pldbra_eH_r1s003g01620_6	ATGCACGTGGCATGTTATTGTACTATCACA
	Pldbra_eH_r1s003g01924_5	ATGAATACATTTGCGCTAGTTCGTTCTCAC
	Pldbra_eH_r1s003g01978_4	ATGGAACACCGACGACGACGAGAT
	Pldbra_eH_r1s004g02262_2	ATGTTAGAGCTCTGGTTC
	Pldbra_eH_r1s004g02369_6	ATGTGCGCGCCCATTGTACATTGT
	Pldbra_eH_r1s004g02522_10	ATGCCGTCAAGGTGGCCGACAACC
	Pldbra_eH_r1s004g02579_4	ATGGACAACGTCATCGGGTGCCGTCCCAAT
	Pldbra_eH_r1s004g02622_7	ATGCTTGGAATATCGCTCATCGTT
	Pldbra_eH_r1s004g02631_6	ATGTGCTCCCCATATCCGGTATTAACGGCACCCTGT
	Pldbra_eH_r1s005g02741_17	ATGCAGTCTCATCGACAT
	Pldbra_eH_r1s005g02906_3	ATGTTCCTGGGCGATTCGACGACA
	Pldbra_eH_r1s005g03020_6	ATGATACCCTGCGATATC
	Pldbra_eH_r1s005g03207_1	ATGCCGCATCGGCAACTGGAGCGAAGACTA
	Pldbra_eH_r1s005g03221_4	ATGCCATCCCACGAACGCGGATCGCGTTGC
	Pldbra_eH_r1s006g03405_4	ATGTGGCGCGTCAGTACC
	Pldbra_eH_r1s006g03684_5	ATGTTGCCGTACCTGATGTCGGTGCATATA
	Pldbra_eH_r1s007g03961_11	ATGCTGCGATGGTTGAAGCTGATCATCTCGTGCATT
	Pldbra_eH_r1s007g04078_7	ATGAATCACATGCTAAACGGCGGCGTCTTGGAT
	Pldbra_eH_r1s007g04083_1	ATGTCATGGCCCGACACGCGAAGGCCA
	Pldbra_eH_r1s007g04097_11	ATGCATATTTGCAGATGCGTGATT
	Pldbra_eH_r1s007g04107_7	ATGTTTGTGATCGTGAAATATGTC
	Pldbra_eH_r1s007g04140_2	ATGGCCTTATCCATGCCCGCTATATTC
	Pldbra_eH_r1s007g04176_5	ATGTTGGTGCAGACCTTGACGCTC
	Pldbra_eH_r1s007g04268_11	ATGCCATACCAACCCTGGCCAAATCGAGACTTTGAAAGCATA
	Pldbra_eH_r1s007g04392_2	ATGATTACCACCGTGGATTTATCAAACTTC
	Pldbra_eH_r1s008g04480_6	ATGATTGCGCATCTGCAC
	Pldbra_eH_r1s008g04572_4	ATGTGCTCAGCGTGTCCCAGGACCCTGCCCTGC
	Pldbra_eH_r1s008g04591_9	ATGCTTCTTTGGGCCTTT
	Pldbra_eH_r1s008g04595_2	ATGAACTCGTGGCCATGGTTGGCGCCCTGTTGC
	Pldbra_eH_r1s008g04783_4	ATGGGAATTCTCAACGGACTCCACCGT
	Pldbra_eH_r1s008g04845_6	ATGGCGTCAACGATGCCCCGGCTC
	Pldbra_eH_r1s009g05044_1	ATGATCGGCGAAACGCTGCCTGGA
	Pldbra_eH_r1s009g05346_4	ATGGATAACCTATATTACCCTACCTACCTAGTG
	Pldbra_eH_r1s010g05482_2	ATGGTCTGGGCATGGCCGTCGGCC
	Pldbra_eH_r1s010g05642_6	ATGAACAATGTGGGGCGGTTTCGCGAGCCC
	Pldbra_eH_r1s010g05711_1	ATGGTGTGGCAGATGCCGAGGTCAGTC
	Pldbra_eH_r1s010g05720_6	ATGTTCCCCATGTGTCTC
	Pldbra_eH_r1s010g05765_8	ATGGTTCGTCTGAAAACGCCGACT
	Pldbra_eH_r1s011g05845_9	ATGCGATCACGATGGCGGGCGAGA
	Pldbra_eH_r1s011g05873_3	ATGGCCTTGGACGTGACAGACTTCCGCGAAACA
	Pldbra_eH_r1s011g05987_1	ATGCGACTCCGCATGGACTAC
	Pldbra_eH_r1s011g06030_26	ATGTTTTCCTCCAGCAAT
	Pldbra_eH_r1s011g06079_3	ATGTTGTCGGCGGTGGCCTGGTTG
	Pldbra_eH_r1s011g06095_3	ATGCCGCAGAAGCGGCGAGAATCCGCGCTTGTGGCGGATTCA
	Pldbra_eH_r1s012g06393_4	ATGAACTTGGGGCCAAACCCGTATGTCTCG
	Pldbra_eH_r1s012g06400_16	ATGTTGGCGGGTTCCTCGACATTA
	Pldbra_eH_r1s012g06406_1	ATGTTCGTTAGCCAACCGCCTGGA
	Pldbra_eH_r1s013g06676_1	ATGCGGCCCTGGTCCCCGCGT
	Pldbra_eH_r1s013g06771_1	ATGGAGGTGCGCCGACGACGCGCC
	Pldbra_eH_r1s013g06910_3	ATGCCCCTCAGGAGCAGATTGACCCTCAGCTTCTCGCAA
	Pldbra_eH_r1s013g06911_11	ATGATTGGACACACACAC
	Pldbra_eH_r1s014g06983_6	ATGCGGTTTCCGTTCTGCAACAGCTGCTTGCGC
	Pldbra_eH_r1s014g07179_2	ATGCTTTCAGGCGTCATCACTCCC
	Pldbra_eH_r1s014g07303_3	ATGCTCACATTCGCCCTTCGCACT
	Pldbra_eH_r1s015g07353_5	ATGTATGATAGACACCGCCAGGTGGATCAATATATCATT
	Pldbra_eH_r1s015g07375_3	ATGCTTTATCAACAAACAGACTCC
	Pldbra_eH_r1s015g07452_1	ATGCACTGTCACTGGAATCTGTTCGGCGAA
	Pldbra_eH_r1s016g07800_5	ATGCTGTCCAGAATGCTGGCGAATTCATTG
	Pldbra_eH_r1s016g07830_1	ATGCTGGCGTGGTCGTCGCATCTT
	Pldbra_eH_r1s017g08123_1	ATGCCGAGACCGAAGCCGAATCTAATGTCGTCAGAGTTC
	Pldbra_eH_r1s017g08231_11	ATGCGCGTGCCGTTGTGTGTA
	Pldbra_eH_r1s017g08284_19	ATGCACTTGCACGACAAGCAA
	Pldbra_eH_r1s017g08386_11	ATGTTCCTAATGTTCTCCTCC
	Pldbra_eH_r1s018g08568_6	ATGACTGTAGTGTTTCTAAATACA
	Pldbra_eH_r1s018g08594_1	ATGCTCGTTCTGCACGGC
	Pldbra_eH_r1s018g08607_7	ATGGTGTCTGGGTTGCCTCATATT
	Pldbra_eH_r1s018g08677_3	ATGTTGTCGCCCGTGACGGCACCCTGGCAG
	Pldbra_eH_r1s019g08721_7	ATGGTCTGGATCATGGATGCTGCT
	Pldbra_eH_r1s019g08859_35	ATGTCACTGGAAGTCCCGTTCCAC
	Pldbra_eH_r1s019g08936_2	ATGCGACTACCTATGAGATTCCAA
	Pldbra_eH_r1s019g08975_1	ATGTTAAACGGTGCTGCGTCGAGC
	Pldbra_eH_r1s020g09116_2	ATGAATGGAGTCAAGTCTCCCGAG
	Pldbra_eH_r1s020g09166_16	ATGTCATTCGGTTTGGCTCGAAGGCAACGATATTCT
	Pldbra_eH_r1s021g09284_16	ATGCCTTCCTGGATACCTGTC
	Pldbra_eH_r1s022g09671_23	ATGATCCATATACGATTGCATATA
	Pldbra_eH_r1s025g10276_3	ATGGATGGACCGCTCTGCACGTGGCTG
	Pldbra_eH_r1s026g10465_5	ATGTTAGACGGGTCATCATCATACGGCAACTGGTTG
	Pldbra_eH_r1s027g10606_5	ATGCCGCTATCAACGCTTCGGAGAATA
	Pldbra_eH_r1s030g11148_6	ATGATATCACAGGCTCCACACTTTCAACGT
	Pldbra_eH_r1s031g11360_1	ATGCTGCTGCCGACCTGCTGGCCC
	Pldbra_eH_r1s033g11481_8	ATGTTCGGCGTCTGGCGG
	Pldbra_eH_r1s035g11692_1	ATGACAAGGATCATGTCGTGC
	Pldbra_eH_r1s037g11863_8	ATGTTCCCACCGCACGTGTCCTGGGCG
	Pldbra_eH_r1s039g12044_6	ATGTGCCACTGGCATCAG
	Pldbra_eH_r1s042g12179_2	ATGGCGTTGTTGTGCATTGCCTGC
	Pldbra_eH_r1s043g12224_8	ATGCTGATTTTGATATTTCAGATAGTATTTATGGTTCAACTTTTTATT
	Pldbra_eH_r1s043g12252_9	ATGAATTATGTTGTTTATTTCATTTGCAGT
	Pldbra_eH_r1s047g12392_2	ATGCTTAATCAGTGTATA
Severe infection level	Pldbra_eH_r1s001g00056_2	ATGACTGCGGGCAGTACAATGGGTTCCGGCCCGACGGTTCGTACGACCGCGACC
	Pldbra_eH_r1s001g00096_4	ATGTTTGTTGCACAAAGCTAC
	Pldbra_eH_r1s001g00098_14	ATGTGCATCAGCCGGCGA
	Pldbra_eH_r1s001g00337_11	ATGCATCTTGGTCAACGATTGTTC
	Pldbra_eH_r1s001g00368_3	ATGCCCTTACGAAGGCGGCTACGACCTTGCATTGGGAACGTC
	Pldbra_eH_r1s001g00517_4	ATGGGCATGTTTCTTGTTCAG
	Pldbra_eH_r1s001g00596_5	ATGTCGACGTTTCTGAAAAAACAT
	Pldbra_eH_r1s001g00616_5	ATGCACACAGTGCACCATCAGGTGCTGGGCAACTCATGC
	Pldbra_eH_r1s001g00731_12	ATGCGGCCCCACCGCTGTGTGATC
	Pldbra_eH_r1s002g01101_1	ATGCGTTCGCGTTGCGCCTCGACG
	Pldbra_eH_r1s002g01406_1	ATGGTTCGAGGAGTTTTGCCGGTTTGCCGACGC
	Pldbra_eH_r1s003g01620_6	ATGCACGTGGCATGTTATTGTACTATCACA
	Pldbra_eH_r1s003g01924_5	ATGAATACATTTGCGCTAGTTCGTTCTCAC
	Pldbra_eH_r1s003g01978_4	ATGGAACACCGACGACGACGAGAT
	Pldbra_eH_r1s004g02262_2	ATGTTAGAGCTCTGGTTC
	Pldbra_eH_r1s004g02369_6	ATGTGCGCGCCCATTGTACATTGT
	Pldbra_eH_r1s004g02522_10	ATGCCGTCAAGGTGGCCGACAACC
	Pldbra_eH_r1s004g02579_4	ATGGACAACGTCATCGGGTGCCGTCCCAAT
	Pldbra_eH_r1s004g02622_7	ATGCTTGGAATATCGCTCATCGTT
	Pldbra_eH_r1s004g02631_6	ATGTGCTCCCCATATCCGGTATTAACGGCACCCTGT
	Pldbra_eH_r1s005g03020_6	ATGATACCCTGCGATATC
	Pldbra_eH_r1s005g03207_1	ATGCCGCATCGGCAACTGGAGCGAAGACTA
	Pldbra_eH_r1s005g03221_4	ATGCCATCCCACGAACGCGGATCGCGTTGC
	Pldbra_eH_r1s007g03961_11	ATGCTGCGATGGTTGAAGCTGATCATCTCGTGCATT
	Pldbra_eH_r1s007g04078_7	ATGAATCACATGCTAAACGGCGGCGTCTTGGAT
	Pldbra_eH_r1s007g04083_1	ATGTCATGGCCCGACACGCGAAGGCCA
	Pldbra_eH_r1s007g04097_11	ATGCATATTTGCAGATGCGTGATT
	Pldbra_eH_r1s007g04107_7	ATGTTTGTGATCGTGAAATATGTC
	Pldbra_eH_r1s007g04140_2	ATGGCCTTATCCATGCCCGCTATATTC
	Pldbra_eH_r1s007g04268_11	ATGCCATACCAACCCTGGCCAAATCGAGACTTTGAAAGCATA
	Pldbra_eH_r1s007g04392_2	ATGATTACCACCGTGGATTTATCAAACTTC
	Pldbra_eH_r1s008g04572_4	ATGTGCTCAGCGTGTCCCAGGACCCTGCCCTGC
	Pldbra_eH_r1s008g04591_9	ATGCTTCTTTGGGCCTTT
	Pldbra_eH_r1s008g04595_2	ATGAACTCGTGGCCATGGTTGGCGCCCTGTTGC
	Pldbra_eH_r1s009g05044_1	ATGATCGGCGAAACGCTGCCTGGA
	Pldbra_eH_r1s009g05346_4	ATGGATAACCTATATTACCCTACCTACCTAGTG
	Pldbra_eH_r1s010g05642_6	ATGAACAATGTGGGGCGGTTTCGCGAGCCC
	Pldbra_eH_r1s010g05720_6	ATGTTCCCCATGTGTCTC
	Pldbra_eH_r1s010g05765_8	ATGGTTCGTCTGAAAACGCCGACT
	Pldbra_eH_r1s011g05845_9	ATGCGATCACGATGGCGGGCGAGA
	Pldbra_eH_r1s011g05873_3	ATGGCCTTGGACGTGACAGACTTCCGCGAAACA
	Pldbra_eH_r1s011g06079_3	ATGTTGTCGGCGGTGGCCTGGTTG
	Pldbra_eH_r1s012g06393_4	ATGAACTTGGGGCCAAACCCGTATGTCTCG
	Pldbra_eH_r1s012g06400_16	ATGTTGGCGGGTTCCTCGACATTA
	Pldbra_eH_r1s012g06406_1	ATGTTCGTTAGCCAACCGCCTGGA
	Pldbra_eH_r1s013g06676_1	ATGCGGCCCTGGTCCCCGCGT
	Pldbra_eH_r1s013g06771_1	ATGGAGGTGCGCCGACGACGCGCC
	Pldbra_eH_r1s014g07179_2	ATGCTTTCAGGCGTCATCACTCCC
	Pldbra_eH_r1s015g07452_1	ATGCACTGTCACTGGAATCTGTTCGGCGAA
	Pldbra_eH_r1s017g08123_1	ATGCCGAGACCGAAGCCGAATCTAATGTCGTCAGAGTTC
	Pldbra_eH_r1s017g08231_11	ATGCGCGTGCCGTTGTGTGTA
	Pldbra_eH_r1s017g08386_11	ATGTTCCTAATGTTCTCCTCC
	Pldbra_eH_r1s018g08568_6	ATGACTGTAGTGTTTCTAAATACA
	Pldbra_eH_r1s018g08594_1	ATGCTCGTTCTGCACGGC
	Pldbra_eH_r1s019g08859_35	ATGTCACTGGAAGTCCCGTTCCAC
	Pldbra_eH_r1s019g08936_2	ATGCGACTACCTATGAGATTCCAA
	Pldbra_eH_r1s019g08975_1	ATGTTAAACGGTGCTGCGTCGAGC
	Pldbra_eH_r1s020g09116_2	ATGAATGGAGTCAAGTCTCCCGAG
	Pldbra_eH_r1s020g09166_16	ATGTCATTCGGTTTGGCTCGAAGGCAACGATATTCT
	Pldbra_eH_r1s025g10276_3	ATGGATGGACCGCTCTGCACGTGGCTG
	Pldbra_eH_r1s027g10606_5	ATGCCGCTATCAACGCTTCGGAGAATA
	Pldbra_eH_r1s031g11360_1	ATGCTGCTGCCGACCTGCTGGCCC
	Pldbra_eH_r1s033g11481_8	ATGTTCGGCGTCTGGCGG
	Pldbra_eH_r1s035g11692_1	ATGACAAGGATCATGTCGTGC
	Pldbra_eH_r1s037g11863_8	ATGTTCCCACCGCACGTGTCCTGGGCG
	Pldbra_eH_r1s043g12224_8	ATGCTGATTTTGATATTTCAGATAGTATTTATGGTTCAACTTTTTATT
	Pldbra_eH_r1s043g12252_9	ATGAATTATGTTGTTTATTTCATTTGCAGT

## Sheet: distinct predicted pathoPEPs
>Pldbra_eH_r1s001g00056_2 [170 - 223] gene:Pldbra_eH_r1s001g00056 name=Pldbra_eH_r1s001g00056 seq_id=Pldbra_eH_r1s001 type=exon
MTAGSTMGSGPTVRTTAT
>Pldbra_eH_r1s001g00096_4 [361 - 381] gene:Pldbra_eH_r1s001g00096 name=Pldbra_eH_r1s001g00096 seq_id=Pldbra_eH_r1s001 type=exon
MFVAQSY
>Pldbra_eH_r1s001g00098_14 [2649 - 2666] gene:Pldbra_eH_r1s001g00098 name=Pldbra_eH_r1s001g00098 seq_id=Pldbra_eH_r1s001 type=exon
MCISRR
>Pldbra_eH_r1s001g00337_11 [1409 - 1432] gene:Pldbra_eH_r1s001g00337 name=Pldbra_eH_r1s001g00337 seq_id=Pldbra_eH_r1s001 type=exon
MHLGQRLF
>Pldbra_eH_r1s001g00368_3 [552 - 593] gene:Pldbra_eH_r1s001g00368 name=Pldbra_eH_r1s001g00368 seq_id=Pldbra_eH_r1s001 type=exon
MPLRRRLRPCIGNV
>Pldbra_eH_r1s001g00517_4 [683 - 703] gene:Pldbra_eH_r1s001g00517 name=Pldbra_eH_r1s001g00517 seq_id=Pldbra_eH_r1s001 type=exon
MGMFLVQ
>Pldbra_eH_r1s001g00596_5 [660 - 683] gene:Pldbra_eH_r1s001g00596 name=Pldbra_eH_r1s001g00596 seq_id=Pldbra_eH_r1s001 type=exon
MSTFLKKH
>Pldbra_eH_r1s001g00616_5 [668 - 706] gene:Pldbra_eH_r1s001g00616 name=Pldbra_eH_r1s001g00616 seq_id=Pldbra_eH_r1s001 type=exon
MHTVHHQVLGNSC
>Pldbra_eH_r1s001g00682_1 [74 - 97] gene:Pldbra_eH_r1s001g00682 name=Pldbra_eH_r1s001g00682 seq_id=Pldbra_eH_r1s001 type=exon
MLLYTAHS
>Pldbra_eH_r1s001g00731_12 [2313 - 2336] gene:Pldbra_eH_r1s001g00731 name=Pldbra_eH_r1s001g00731 seq_id=Pldbra_eH_r1s001 type=exon
MRPHRCVI
>Pldbra_eH_r1s002g01101_1 [50 - 73] gene:Pldbra_eH_r1s002g01101 name=Pldbra_eH_r1s002g01101 seq_id=Pldbra_eH_r1s002 type=exon
MRSRCAST
>Pldbra_eH_r1s002g01141_1 [189 - 206] gene:Pldbra_eH_r1s002g01141 name=Pldbra_eH_r1s002g01141 seq_id=Pldbra_eH_r1s002 type=exon
MFQRPS
>Pldbra_eH_r1s002g01204_9 [1239 - 1271] gene:Pldbra_eH_r1s002g01204 name=Pldbra_eH_r1s002g01204 seq_id=Pldbra_eH_r1s002 type=exon
MRPYRIRSPSI
>Pldbra_eH_r1s002g01224_3 [351 - 386] gene:Pldbra_eH_r1s002g01224 name=Pldbra_eH_r1s002g01224 seq_id=Pldbra_eH_r1s002 type=exon
MPGLRQNVHKTG
>Pldbra_eH_r1s003g01620_6 [874 - 903] gene:Pldbra_eH_r1s003g01620 name=Pldbra_eH_r1s003g01620 seq_id=Pldbra_eH_r1s003 type=exon
MHVACYCTIT
>Pldbra_eH_r1s003g01924_5 [2149 - 2178] gene:Pldbra_eH_r1s003g01924 name=Pldbra_eH_r1s003g01924 seq_id=Pldbra_eH_r1s003 type=exon
MNTFALVRSH
>Pldbra_eH_r1s003g01978_4 [1375 - 1398] gene:Pldbra_eH_r1s003g01978 name=Pldbra_eH_r1s003g01978 seq_id=Pldbra_eH_r1s003 type=exon
MEHRRRRD
>Pldbra_eH_r1s004g02262_2 [244 - 261] gene:Pldbra_eH_r1s004g02262 name=Pldbra_eH_r1s004g02262 seq_id=Pldbra_eH_r1s004 type=exon
MLELWF
>Pldbra_eH_r1s004g02369_6 [1875 - 1898] gene:Pldbra_eH_r1s004g02369 name=Pldbra_eH_r1s004g02369 seq_id=Pldbra_eH_r1s004 type=exon
MCAPIVHC
>Pldbra_eH_r1s004g02522_10 [2696 - 2719] gene:Pldbra_eH_r1s004g02522 name=Pldbra_eH_r1s004g02522 seq_id=Pldbra_eH_r1s004 type=exon
MPSRWPTT
>Pldbra_eH_r1s004g02579_4 [1020 - 1049] gene:Pldbra_eH_r1s004g02579 name=Pldbra_eH_r1s004g02579 seq_id=Pldbra_eH_r1s004 type=exon
MDNVIGCRPN
>Pldbra_eH_r1s004g02622_7 [1361 - 1384] gene:Pldbra_eH_r1s004g02622 name=Pldbra_eH_r1s004g02622 seq_id=Pldbra_eH_r1s004 type=exon
MLGISLIV
>Pldbra_eH_r1s004g02631_6 [474 - 509] gene:Pldbra_eH_r1s004g02631 name=Pldbra_eH_r1s004g02631 seq_id=Pldbra_eH_r1s004 type=exon
MCSPYPVLTAPC
>Pldbra_eH_r1s005g02741_17 [3564 - 3581] gene:Pldbra_eH_r1s005g02741 name=Pldbra_eH_r1s005g02741 seq_id=Pldbra_eH_r1s005 type=exon
MQSHRH
>Pldbra_eH_r1s005g02906_3 [368 - 391] gene:Pldbra_eH_r1s005g02906 name=Pldbra_eH_r1s005g02906 seq_id=Pldbra_eH_r1s005 type=exon
MFLGDSTT
>Pldbra_eH_r1s005g03020_6 [782 - 799] gene:Pldbra_eH_r1s005g03020 name=Pldbra_eH_r1s005g03020 seq_id=Pldbra_eH_r1s005 type=exon
MIPCDI
>Pldbra_eH_r1s005g03207_1 [27 - 56] gene:Pldbra_eH_r1s005g03207 name=Pldbra_eH_r1s005g03207 seq_id=Pldbra_eH_r1s005 type=exon
MPHRQLERRL
>Pldbra_eH_r1s005g03221_4 [521 - 550] gene:Pldbra_eH_r1s005g03221 name=Pldbra_eH_r1s005g03221 seq_id=Pldbra_eH_r1s005 type=exon
MPSHERGSRC
>Pldbra_eH_r1s006g03405_4 [963 - 980] gene:Pldbra_eH_r1s006g03405 name=Pldbra_eH_r1s006g03405 seq_id=Pldbra_eH_r1s006 type=exon
MWRVST
>Pldbra_eH_r1s006g03684_5 [1377 - 1406] gene:Pldbra_eH_r1s006g03684 name=Pldbra_eH_r1s006g03684 seq_id=Pldbra_eH_r1s006 type=exon
MLPYLMSVHI
>Pldbra_eH_r1s007g03961_11 [1490 - 1525] gene:Pldbra_eH_r1s007g03961 name=Pldbra_eH_r1s007g03961 seq_id=Pldbra_eH_r1s007 type=exon
MLRWLKLIISCI
>Pldbra_eH_r1s007g04078_7 [1016 - 1048] gene:Pldbra_eH_r1s007g04078 name=Pldbra_eH_r1s007g04078 seq_id=Pldbra_eH_r1s007 type=exon
MNHMLNGGVLD
>Pldbra_eH_r1s007g04083_1 [845 - 871] gene:Pldbra_eH_r1s007g04083 name=Pldbra_eH_r1s007g04083 seq_id=Pldbra_eH_r1s007 type=exon
MSWPDTRRP
>Pldbra_eH_r1s007g04097_11 [1600 - 1623] gene:Pldbra_eH_r1s007g04097 name=Pldbra_eH_r1s007g04097 seq_id=Pldbra_eH_r1s007 type=exon
MHICRCVI
>Pldbra_eH_r1s007g04107_7 [1093 - 1116] gene:Pldbra_eH_r1s007g04107 name=Pldbra_eH_r1s007g04107 seq_id=Pldbra_eH_r1s007 type=exon
MFVIVKYV
>Pldbra_eH_r1s007g04140_2 [339 - 365] gene:Pldbra_eH_r1s007g04140 name=Pldbra_eH_r1s007g04140 seq_id=Pldbra_eH_r1s007 type=exon
MALSMPAIF
>Pldbra_eH_r1s007g04176_5 [521 - 544] gene:Pldbra_eH_r1s007g04176 name=Pldbra_eH_r1s007g04176 seq_id=Pldbra_eH_r1s007 type=exon
MLVQTLTL
>Pldbra_eH_r1s007g04268_11 [1068 - 1109] gene:Pldbra_eH_r1s007g04268 name=Pldbra_eH_r1s007g04268 seq_id=Pldbra_eH_r1s007 type=exon
MPYQPWPNRDFESI
>Pldbra_eH_r1s007g04392_2 [146 - 175] gene:Pldbra_eH_r1s007g04392 name=Pldbra_eH_r1s007g04392 seq_id=Pldbra_eH_r1s007 type=exon
MITTVDLSNF
>Pldbra_eH_r1s008g04480_6 [584 - 601] gene:Pldbra_eH_r1s008g04480 name=Pldbra_eH_r1s008g04480 seq_id=Pldbra_eH_r1s008 type=exon
MIAHLH
>Pldbra_eH_r1s008g04572_4 [665 - 697] gene:Pldbra_eH_r1s008g04572 name=Pldbra_eH_r1s008g04572 seq_id=Pldbra_eH_r1s008 type=exon
MCSACPRTLPC
>Pldbra_eH_r1s008g04591_9 [1521 - 1538] gene:Pldbra_eH_r1s008g04591 name=Pldbra_eH_r1s008g04591 seq_id=Pldbra_eH_r1s008 type=exon
MLLWAF
>Pldbra_eH_r1s008g04595_2 [374 - 406] gene:Pldbra_eH_r1s008g04595 name=Pldbra_eH_r1s008g04595 seq_id=Pldbra_eH_r1s008 type=exon
MNSWPWLAPCC
>Pldbra_eH_r1s008g04783_4 [1005 - 1031] gene:Pldbra_eH_r1s008g04783 name=Pldbra_eH_r1s008g04783 seq_id=Pldbra_eH_r1s008 type=exon
MGILNGLHR
>Pldbra_eH_r1s008g04845_6 [1880 - 1903] gene:Pldbra_eH_r1s008g04845 name=Pldbra_eH_r1s008g04845 seq_id=Pldbra_eH_r1s008 type=exon
MASTMPRL
>Pldbra_eH_r1s009g05044_1 [161 - 184] gene:Pldbra_eH_r1s009g05044 name=Pldbra_eH_r1s009g05044 seq_id=Pldbra_eH_r1s009 type=exon
MIGETLPG
>Pldbra_eH_r1s009g05346_4 [1438 - 1470] gene:Pldbra_eH_r1s009g05346 name=Pldbra_eH_r1s009g05346 seq_id=Pldbra_eH_r1s009 type=exon
MDNLYYPTYLV
>Pldbra_eH_r1s010g05482_2 [443 - 466] gene:Pldbra_eH_r1s010g05482 name=Pldbra_eH_r1s010g05482 seq_id=Pldbra_eH_r1s010 type=exon
MVWAWPSA
>Pldbra_eH_r1s010g05642_6 [618 - 647] gene:Pldbra_eH_r1s010g05642 name=Pldbra_eH_r1s010g05642 seq_id=Pldbra_eH_r1s010 type=exon
MNNVGRFREP
>Pldbra_eH_r1s010g05711_1 [59 - 85] gene:Pldbra_eH_r1s010g05711 name=Pldbra_eH_r1s010g05711 seq_id=Pldbra_eH_r1s010 type=exon
MVWQMPRSV
>Pldbra_eH_r1s010g05720_6 [691 - 708] gene:Pldbra_eH_r1s010g05720 name=Pldbra_eH_r1s010g05720 seq_id=Pldbra_eH_r1s010 type=exon
MFPMCL
>Pldbra_eH_r1s010g05765_8 [1001 - 1024] gene:Pldbra_eH_r1s010g05765 name=Pldbra_eH_r1s010g05765 seq_id=Pldbra_eH_r1s010 type=exon
MVRLKTPT
>Pldbra_eH_r1s011g05845_9 [1868 - 1891] gene:Pldbra_eH_r1s011g05845 name=Pldbra_eH_r1s011g05845 seq_id=Pldbra_eH_r1s011 type=exon
MRSRWRAR
>Pldbra_eH_r1s011g05873_3 [446 - 478] gene:Pldbra_eH_r1s011g05873 name=Pldbra_eH_r1s011g05873 seq_id=Pldbra_eH_r1s011 type=exon
MALDVTDFRET
>Pldbra_eH_r1s011g05987_1 [53 - 73] gene:Pldbra_eH_r1s011g05987 name=Pldbra_eH_r1s011g05987 seq_id=Pldbra_eH_r1s011 type=exon
MRLRMDY
>Pldbra_eH_r1s011g06030_26 [4145 - 4162] gene:Pldbra_eH_r1s011g06030 name=Pldbra_eH_r1s011g06030 seq_id=Pldbra_eH_r1s011 type=exon
MFSSSN
>Pldbra_eH_r1s011g06079_3 [572 - 595] gene:Pldbra_eH_r1s011g06079 name=Pldbra_eH_r1s011g06079 seq_id=Pldbra_eH_r1s011 type=exon
MLSAVAWL
>Pldbra_eH_r1s011g06095_3 [518 - 559] gene:Pldbra_eH_r1s011g06095 name=Pldbra_eH_r1s011g06095 seq_id=Pldbra_eH_r1s011 type=exon
MPQKRRESALVADS
>Pldbra_eH_r1s012g06393_4 [602 - 631] gene:Pldbra_eH_r1s012g06393 name=Pldbra_eH_r1s012g06393 seq_id=Pldbra_eH_r1s012 type=exon
MNLGPNPYVS
>Pldbra_eH_r1s012g06400_16 [3102 - 3125] gene:Pldbra_eH_r1s012g06400 name=Pldbra_eH_r1s012g06400 seq_id=Pldbra_eH_r1s012 type=exon
MLAGSSTL
>Pldbra_eH_r1s012g06406_1 [135 - 158] gene:Pldbra_eH_r1s012g06406 name=Pldbra_eH_r1s012g06406 seq_id=Pldbra_eH_r1s012 type=exon
MFVSQPPG
>Pldbra_eH_r1s013g06676_1 [890 - 910] gene:Pldbra_eH_r1s013g06676 name=Pldbra_eH_r1s013g06676 seq_id=Pldbra_eH_r1s013 type=exon
MRPWSPR
>Pldbra_eH_r1s013g06771_1 [59 - 82] gene:Pldbra_eH_r1s013g06771 name=Pldbra_eH_r1s013g06771 seq_id=Pldbra_eH_r1s013 type=exon
MEVRRRRA
>Pldbra_eH_r1s013g06910_3 [309 - 347] gene:Pldbra_eH_r1s013g06910 name=Pldbra_eH_r1s013g06910 seq_id=Pldbra_eH_r1s013 type=exon
MPLRSRLTLSFSQ
>Pldbra_eH_r1s013g06911_11 [1555 - 1572] gene:Pldbra_eH_r1s013g06911 name=Pldbra_eH_r1s013g06911 seq_id=Pldbra_eH_r1s013 type=exon
MIGHTH
>Pldbra_eH_r1s014g06983_6 [1250 - 1282] gene:Pldbra_eH_r1s014g06983 name=Pldbra_eH_r1s014g06983 seq_id=Pldbra_eH_r1s014 type=exon
MRFPFCNSCLR
>Pldbra_eH_r1s014g07179_2 [368 - 391] gene:Pldbra_eH_r1s014g07179 name=Pldbra_eH_r1s014g07179 seq_id=Pldbra_eH_r1s014 type=exon
MLSGVITP
>Pldbra_eH_r1s014g07303_3 [1226 - 1249] gene:Pldbra_eH_r1s014g07303 name=Pldbra_eH_r1s014g07303 seq_id=Pldbra_eH_r1s014 type=exon
MLTFALRT
>Pldbra_eH_r1s015g07353_5 [859 - 897] gene:Pldbra_eH_r1s015g07353 name=Pldbra_eH_r1s015g07353 seq_id=Pldbra_eH_r1s015 type=exon
MYDRHRQVDQYII
>Pldbra_eH_r1s015g07375_3 [327 - 350] gene:Pldbra_eH_r1s015g07375 name=Pldbra_eH_r1s015g07375 seq_id=Pldbra_eH_r1s015 type=exon
MLYQQTDS
>Pldbra_eH_r1s015g07452_1 [291 - 320] gene:Pldbra_eH_r1s015g07452 name=Pldbra_eH_r1s015g07452 seq_id=Pldbra_eH_r1s015 type=exon
MHCHWNLFGE
>Pldbra_eH_r1s016g07800_5 [1461 - 1490] gene:Pldbra_eH_r1s016g07800 name=Pldbra_eH_r1s016g07800 seq_id=Pldbra_eH_r1s016 type=exon
MLSRMLANSL
>Pldbra_eH_r1s016g07830_1 [9 - 32] gene:Pldbra_eH_r1s016g07830 name=Pldbra_eH_r1s016g07830 seq_id=Pldbra_eH_r1s016 type=exon
MLAWSSHL
>Pldbra_eH_r1s017g08123_1 [83 - 121] gene:Pldbra_eH_r1s017g08123 name=Pldbra_eH_r1s017g08123 seq_id=Pldbra_eH_r1s017 type=exon
MPRPKPNLMSSEF
>Pldbra_eH_r1s017g08231_11 [1743 - 1763] gene:Pldbra_eH_r1s017g08231 name=Pldbra_eH_r1s017g08231 seq_id=Pldbra_eH_r1s017 type=exon
MRVPLCV
>Pldbra_eH_r1s017g08284_19 [2092 - 2112] gene:Pldbra_eH_r1s017g08284 name=Pldbra_eH_r1s017g08284 seq_id=Pldbra_eH_r1s017 type=exon
MHLHDKQ
>Pldbra_eH_r1s017g08386_11 [1835 - 1855] gene:Pldbra_eH_r1s017g08386 name=Pldbra_eH_r1s017g08386 seq_id=Pldbra_eH_r1s017 type=exon
MFLMFSS
>Pldbra_eH_r1s018g08568_6 [1500 - 1523] gene:Pldbra_eH_r1s018g08568 name=Pldbra_eH_r1s018g08568 seq_id=Pldbra_eH_r1s018 type=exon
MTVVFLNT
>Pldbra_eH_r1s018g08594_1 [507 - 524] gene:Pldbra_eH_r1s018g08594 name=Pldbra_eH_r1s018g08594 seq_id=Pldbra_eH_r1s018 type=exon
MLVLHG
>Pldbra_eH_r1s018g08607_7 [628 - 651] gene:Pldbra_eH_r1s018g08607 name=Pldbra_eH_r1s018g08607 seq_id=Pldbra_eH_r1s018 type=exon
MVSGLPHI
>Pldbra_eH_r1s018g08677_3 [2030 - 2059] gene:Pldbra_eH_r1s018g08677 name=Pldbra_eH_r1s018g08677 seq_id=Pldbra_eH_r1s018 type=exon
MLSPVTAPWQ
>Pldbra_eH_r1s019g08721_7 [984 - 1007] gene:Pldbra_eH_r1s019g08721 name=Pldbra_eH_r1s019g08721 seq_id=Pldbra_eH_r1s019 type=exon
MVWIMDAA
>Pldbra_eH_r1s019g08859_35 [7087 - 7110] gene:Pldbra_eH_r1s019g08859 name=Pldbra_eH_r1s019g08859 seq_id=Pldbra_eH_r1s019 type=exon
MSLEVPFH
>Pldbra_eH_r1s019g08936_2 [262 - 285] gene:Pldbra_eH_r1s019g08936 name=Pldbra_eH_r1s019g08936 seq_id=Pldbra_eH_r1s019 type=exon
MRLPMRFQ
>Pldbra_eH_r1s019g08975_1 [50 - 73] gene:Pldbra_eH_r1s019g08975 name=Pldbra_eH_r1s019g08975 seq_id=Pldbra_eH_r1s019 type=exon
MLNGAASS
>Pldbra_eH_r1s020g09116_2 [91 - 114] gene:Pldbra_eH_r1s020g09116 name=Pldbra_eH_r1s020g09116 seq_id=Pldbra_eH_r1s020 type=exon
MNGVKSPE
>Pldbra_eH_r1s020g09166_16 [1496 - 1531] gene:Pldbra_eH_r1s020g09166 name=Pldbra_eH_r1s020g09166 seq_id=Pldbra_eH_r1s020 type=exon
MSFGLARRQRYS
>Pldbra_eH_r1s021g09284_16 [1438 - 1458] gene:Pldbra_eH_r1s021g09284 name=Pldbra_eH_r1s021g09284 seq_id=Pldbra_eH_r1s021 type=exon
MPSWIPV
>Pldbra_eH_r1s022g09671_23 [3592 - 3615] gene:Pldbra_eH_r1s022g09671 name=Pldbra_eH_r1s022g09671 seq_id=Pldbra_eH_r1s022 type=exon
MIHIRLHI
>Pldbra_eH_r1s025g10276_3 [692 - 718] gene:Pldbra_eH_r1s025g10276 name=Pldbra_eH_r1s025g10276 seq_id=Pldbra_eH_r1s025 type=exon
MDGPLCTWL
>Pldbra_eH_r1s026g10465_5 [827 - 862] gene:Pldbra_eH_r1s026g10465 name=Pldbra_eH_r1s026g10465 seq_id=Pldbra_eH_r1s026 type=exon
MLDGSSSYGNWL
>Pldbra_eH_r1s027g10606_5 [916 - 942] gene:Pldbra_eH_r1s027g10606 name=Pldbra_eH_r1s027g10606 seq_id=Pldbra_eH_r1s027 type=exon
MPLSTLRRI
>Pldbra_eH_r1s030g11148_6 [1490 - 1519] gene:Pldbra_eH_r1s030g11148 name=Pldbra_eH_r1s030g11148 seq_id=Pldbra_eH_r1s030 type=exon
MISQAPHFQR
>Pldbra_eH_r1s031g11360_1 [62 - 85] gene:Pldbra_eH_r1s031g11360 name=Pldbra_eH_r1s031g11360 seq_id=Pldbra_eH_r1s031 type=exon
MLLPTCWP
>Pldbra_eH_r1s033g11481_8 [1740 - 1757] gene:Pldbra_eH_r1s033g11481 name=Pldbra_eH_r1s033g11481 seq_id=Pldbra_eH_r1s033 type=exon
MFGVWR
>Pldbra_eH_r1s035g11692_1 [134 - 154] gene:Pldbra_eH_r1s035g11692 name=Pldbra_eH_r1s035g11692 seq_id=Pldbra_eH_r1s035 type=exon
MTRIMSC
>Pldbra_eH_r1s037g11863_8 [2411 - 2437] gene:Pldbra_eH_r1s037g11863 name=Pldbra_eH_r1s037g11863 seq_id=Pldbra_eH_r1s037 type=exon
MFPPHVSWA
>Pldbra_eH_r1s039g12044_6 [758 - 775] gene:Pldbra_eH_r1s039g12044 name=Pldbra_eH_r1s039g12044 seq_id=Pldbra_eH_r1s039 type=exon
MCHWHQ
>Pldbra_eH_r1s042g12179_2 [281 - 304] gene:Pldbra_eH_r1s042g12179 name=Pldbra_eH_r1s042g12179 seq_id=Pldbra_eH_r1s042 type=exon
MALLCIAC
>Pldbra_eH_r1s043g12224_8 [581 - 628] gene:Pldbra_eH_r1s043g12224 name=cox3 seq_id=Pldbra_eH_r1s043 type=exon
MLILIFQIVFMVQLFI
>Pldbra_eH_r1s043g12252_9 [618 - 647] gene:Pldbra_eH_r1s043g12252 name=nad4 seq_id=Pldbra_eH_r1s043 type=exon
MNYVVYFICS
>Pldbra_eH_r1s047g12392_2 [174 - 191] gene:Pldbra_eH_r1s047g12392 name=Pldbra_eH_r1s047g12392 seq_id=Pldbra_eH_r1s047 type=exon
MLNQCI
>Pldbra_eH_r1s046g12334_3 [767 - 787] gene:Pldbra_eH_r1s046g12334 name=Pldbra_eH_r1s046g12334 seq_id=Pldbra_eH_r1s046 type=exon
MKPSMSS
>Pldbra_eH_r1s009g05284_11 [1454 - 1471] gene:Pldbra_eH_r1s009g05284 name=Pldbra_eH_r1s009g05284 seq_id=Pldbra_eH_r1s009 type=exon
MVQHDV
>Pldbra_eH_r1s003g01485_3 [342 - 371] gene:Pldbra_eH_r1s003g01485 name=Pldbra_eH_r1s003g01485 seq_id=Pldbra_eH_r1s003 type=exon
MATSRSVSRS
>Pldbra_eH_r1s002g01406_1 [15 - 47] gene:Pldbra_eH_r1s002g01406 name=Pldbra_eH_r1s002g01406 seq_id=Pldbra_eH_r1s002 type=exon
MVRGVLPVCRR

## Sheet: pathoPEPs predicted in UTRs
Pldbra_eH_r1s019g08859_35	MSLEVPFH
Pldbra_eH_r1s006g03405_4	MWRVST
Pldbra_eH_r1s020g09116_2	MNGVKSPE
Pldbra_eH_r1s003g01924_5	MNTFALVRSH
Pldbra_eH_r1s009g05284_11	MVQHDV
Pldbra_eH_r1s002g01204_9	MRPYRIRSPSI
Pldbra_eH_r1s005g03020_6	MIPCDI
Pldbra_eH_r1s046g12334_3	MKPSMSS
Pldbra_eH_r1s010g05720_6	MFPMCL
Pldbra_eH_r1s012g06393_4	MNLGPNPYVS
Pldbra_eH_r1s019g08936_2	MRLPMRFQ
Pldbra_eH_r1s001g00096_4	MFVAQSY
Pldbra_eH_r1s018g08568_6	MTVVFLNT
Pldbra_eH_r1s037g11863_8	MFPPHVSWA
Pldbra_eH_r1s001g00731_12	MRPHRCVI
Pldbra_eH_r1s003g01620_6	MHVACYCTIT
Pldbra_eH_r1s003g01485_3	MATSRSVSRS
Pldbra_eH_r1s009g05346_4	MDNLYYPTYLV
Pldbra_eH_r1s020g09166_16	MSFGLARRQRYS
Pldbra_eH_r1s022g09671_23	MIHIRLHI
Pldbra_eH_r1s016g07830_1	MLAWSSHL
Pldbra_eH_r1s001g00682_1	MLLYTAHS
Pldbra_eH_r1s006g03684_5	MLPYLMSVHI
Pldbra_eH_r1s015g07353_5	MYDRHRQVDQYII
Pldbra_eH_r1s013g06910_3	MPLRSRLTLSFSQ
Pldbra_eH_r1s008g04480_6	MIAHLH
Pldbra_eH_r1s013g06911_11	MIGHTH
