# Supplementary material
Source: HighWire-hosted journal article supplement (doi:10.1101/rna.080819.125)
Supplement: Supplemental_Legends.docx [file Supplemental_Legends.docx]

**Figure S1.** Volcano plot of differential gene expression of *B. napus* uninfected compared to weak **(A)**, moderate **(B),** or severe **(C)** *P. brassicae* infection levels.

Each point represents a gene, indicating its significance (p-value) relative to the log2FoldChange. These two parameters are calculated by DESeq2 using three biological replicates. A difference in expression is deemed significant for a p-value of 0.01 (red broken horizontal line). The 7, 24 and 18 miRNA genes of *B. napus* that are targeted by the pathoPEPs predicted from *P. brassicae* transcripts are shown in purple (A), light red (B) and green (C).

**Figure S2.** Clubroot development.

Clubroot symptoms **(A)** were assessed using the disease index **(B)** and the quantification of *P. brassicae* DNA by qPCR **(C)**, calculated as a ratio of the 18S DNA amount to total DNA. The data represent the means of three biological replicates (12 plants per replicate), with error bars indicating standard errors of the means. Different letters denote statistically significant differences between genotypes at *P* < 0.05.

**Figure S3.** Distribution of the nucleotide length of ribosomal protected fragments derived from Ribo-seq reads for the three biological replicates of the infected Tenor genotype.

**Figure S4.** Plot of the ribosome footprint of pathoPEP candidate.

Coverage of ribo-seq along the 3 frames of *P. brassicae* transcripts Pldbra_eH_r1s016g07830 **(A)**, Pldbra_eH_r1s020g09116 **(B)**, and Pldbra_eH_r1s019g08936 **(C).** T-A (red), T-B (blue), and T-C (green) are the biological replicates of *B. napus* Tenor infected with *P. brassicae*. Purple lines denote the start and stop codons of the CDS. The yellow highlighter indicates the position of the pathoPEP candidate in frame 3 of the transcript. Vertical black bars on the different frames mark canonical stop codons (UAA, UAG or UGA), while vertical white bars denote AUG start codons.

**Figure S5.** Comparative analysis of Yudal and Tenor genotypes.

Volcano plots of **(A)** the differentially expressed genes DEGs, and (B) the differentially translated genes DTGs**,** targeted by the 3 miRNAs. The log2FC indicates the mean expression level for each gene. Each dot represents a single gene. Black dots indicate no significant DEGs or DTGs, blue dots represent down-regulated genes in Tenor compared to Yudal, and red dots indicate up-regulated genes in Tenor compared to Yudal.

**Table S1.** List of *P. brassicae* pathoPEPs targeting the miRNA genes of *B. napus* across the three infection levels.

**Table S2.** Position, region and ribosome coverage of the 27 pathoPEPs predicted in the untranslated regions (UTR). A "-" indicates no ribosomal coverage, while one to three "+" signs indicate ribosomal coverage observed in one, two, or three biological replicates, respectively.

## File S1. Supplementary methods

### Experimental design, plant material, pathogen inoculation, and disease assessment employed in Ribo-seq.

**File S2.** Candidate sequences of the study.
