# Supplementary material
Source: HighWire-hosted journal article supplement (doi:10.1101/rna.080819.125)
Supplement: Supplemental_methods.docx [file Supplemental_methods.docx]

## File S1 Supplementary methods

### *Experimental design, plant material, pathogen inoculation, and disease assessment employed in Ribo-seq.*

The genotypes Tenor and Yudal of *B. napus*, along with the eH isolate of *P. brassicae* (pathotype P1) were used in this study (Daval et al., 2019). *B. napus* seeds were sown in pots containing 400 g of soil and incubated in a climatic chamber. For each condition (Yudal and Tenor inoculated with *P. brassicae*), three replicates of 12 plants were prepared. The plants were inoculated with a resting spore suspension of the *P. brassicae* eH isolate. The inoculum was prepared by collecting clubs from the universal susceptible host Chinese cabbage (*B. rapa* ssp *pekinensis* cv. *Granaat*) blended with sterile water, and filtered through layers of cheesecloth. Resting spores were further filtered through 500, 100, and 55 µM sieves to remove plant cell debris. Spore concentration was determined using a Malassez cell and adjusted to 1 × 10⁷ spores ml-1. Ten-day-old seedlings were inoculated by applying 1 ml of the spore suspension (1 × 10⁷ spores ml-1) to the base of each stem. Plants were maintained at 22°C during the day and 19°C at night, under a 16-hour photoperiod. They were watered periodically with Hoagland nutritive solution to ensure nutrient supply and maintain a water retention capacity of 70–100%. Roots from 12 plants were sampled 45 days after inoculation.

In each replicate, eight plants were selected for disease assessment and pathogen quantification. Clubroot symptoms were evaluated using a disease index based on gall localization and size (Manzanares-Dauleux et al., 2000). Roots were excised below the collar at a depth of -1 to -6 cm, separated from the soil, and washed twice in sterile water for 10 seconds each using vortexing. The roots were then cut into small pieces, frozen in liquid nitrogen, and stored at -80°C. Following lyophilization, dry root biomass was measured, and the resulting powder was used for DNA extraction and pathogen quantification via qPCR (Daval et al., 2020).

For quantitative PCR, 1 µl of DNA extracted from root samples was analyzed using the LightCycler® 480 Real-Time PCR System (Roche) to quantify *P. brassicae*. This involved amplifying a 164 pb sequence of the 18S gene with primers: 5ʹ-TTGGGTAATTTGCGCGCCTG-3ʹ (forward) and 5ʹ-CAGCGGCAGGTCATTCAACA-3ʹ (reverse). Each 20 µl qPCR reaction contained 10 µl of SYBR Green Master Mix (Roche), 0.08 µl of each primer (100 µM), and 1 µl of template DNA. The PCR conditions consisted of an initial denaturation at 95°C for 5 min, followed by 45 cycles at 95°C for 10 s and 64°C for 40 s. Standard curves were generated using serial dilutions of *P. brassicae* DNA extracted from resting spores. Quantitative results were normalized to represent the mean *P. brassicae* DNA content in the total root-extracted DNA.

In each replicate (n=3), roots from the four remaining plants were sampled, washed in sterile water, cut into small pieces, and frozen in liquid nitrogen before storage at -80°C for subsequent ribosomal profiling.

Daval, S., Belcour, A., Gazengel, K., Legrand, L., Gouzy, J., Cottret, L., Lebreton, L., Aigu, Y., Mougel, C., and Manzanares-Dauleux, M. J. (2019). Computational analysis of the Plasmodiophora brassicae genome: mitochondrial sequence description and metabolic pathway database design. *Genomics* 111:1629–1640. doi:10.1016/J.YGENO.2018.11.013.

Daval, S., Gazengel, K., Belcour, A., Linglin, J., Guillerm-Erckelboudt, A. Y., Sarniguet, A., Manzanares-Dauleux, M. J., Lebreton, L., and Mougel, C. (2020). Soil microbiota influences clubroot disease by modulating Plasmodiophora brassicae and Brassica napus transcriptomes. *Microb. Biotechnol.* 13:1648–1672. doi:10.1111/1751-7915.13634.

Manzanares-Dauleux, M.J., Divaret, I., Baron, F., and Thomas, G. (2000) Evaluation of French *Brassica oleracea* landraces for resistance to *Plasmodiophora brassicae*. *Euphytica* 113: 211–218.
